# Supplementary material for: Tetrazole amides as hydrogen-bonding donor catalysts in the chemoselective oxidation of sulphides and disulphides
Source: Royal Society of Chemistry journal article supplement (doi:10.1039/c4cy00086b), 2014-01-01
Supplement: c4cy00086b1.pdf [file c4cy00086b1.pdf]

## Supporting Information

### Tetrazole Amides as Hydrogen-Bonding Donor Catalysts in the Chemoselective Oxidation of Sulphides and Disulphides

Francesco Secci\*, Massimiliano Arca, Angelo Frongia, Pier Paolo Piras\*

*Dipartimento di Scienze Chimiche e Geologiche, Università degli studi di Cagliari, Complesso  
Universitario di Monserrato, S.S. 554, Bivio per Sestu,*

I-09042, Monserrato, Cagliari, Italy. Phone number (+39) 070 675 4384, e-mail fsecci@unica.it

|                                                     |   |
|-----------------------------------------------------|---|
| 1. Synthesis .....                                  | 3 |
| 1.1 General methods .....                           | 3 |
| 1.2 Synthesis of sulphides 5g, 5i, 5l, 5n, 5s ..... | 4 |
| Synthesis of sulphide 5g. ....                      | 4 |
| Synthesis of sulphide 5i. ....                      | 4 |
| Synthesis of sulphide 5l. ....                      | 4 |
| Synthesis of sulphide 5n. ....                      | 5 |
| Synthesis of sulphide 5s. ....                      | 5 |
| 1.3 Synthesis of sulfoxides 6a-6t. ....             | 6 |
| Sulfoxide 6b .....                                  | 6 |
| Sulfoxide 6c.....                                   | 6 |
| Sulfoxide 6d .....                                  | 6 |
| Sulfoxide 6e .....                                  | 7 |
| Sulfoxide 6f. ....                                  | 7 |
| Sulfoxide 6g. ....                                  | 7 |
| Sulfoxide 6h. ....                                  | 7 |
| Sulfoxide 6i. ....                                  | 8 |
| Sulfoxide 6j. ....                                  | 8 |
| Sulfoxide 6k. ....                                  | 8 |
| Sulfoxide 6l. ....                                  | 8 |
| Sulfoxide 6m. ....                                  | 8 |
| Sulfoxide 6n. ....                                  | 8 |
| Sulfoxide 6o. ....                                  | 9 |

|                                                                                             |    |
|---------------------------------------------------------------------------------------------|----|
| Sulfoxide 6p.....                                                                           | 9  |
| Sulfoxide 6s.....                                                                           | 9  |
| Sulfoxide 6t.....                                                                           | 9  |
| 2. Spectroscopic NMR data.....                                                              | 10 |
| 2.1 <sup>1</sup> H and <sup>13</sup> C NMR spectra data of compound 5g, 5i, 5l, 5n, 5s..... | 10 |
| 2.2 <sup>1</sup> H and <sup>13</sup> C NMR spectra data of compound 6a–6p, 6s, 6t.....      | 15 |
| 2.3 <sup>1</sup> H NMR spectra and titration of compound 2a with TBHP.....                  | 31 |
| 3. DFT-Optimized metric parameters.....                                                     | 39 |
| 3.2 Energy Surface Investigation for 2a.....                                                | 42 |
| 4. Catalyst recovery and scaling-up experiments.....                                        | 43 |
| 4.1 Scaling-up reactions.....                                                               | 43 |
| 4.2 Catalyst recovery procedures.....                                                       | 43 |
| 5. References.....                                                                          | 45 |

## 1. Synthesis

### 1.1 General methods

<sup>1</sup>H NMR spectra were recorded on 400 and 500 MHz Varian spectrometers at 27°C using CDCl<sub>3</sub>, DMF-*d*<sub>7</sub> or DMSO-*d*<sub>6</sub> as solvent. <sup>13</sup>C NMR were recorded at 100 and 125 MHz at 27°C using CDCl<sub>3</sub>, DMF-*d*<sub>7</sub> or DMSO-*d*<sub>6</sub> as solvent. Chemical shifts ( $\delta$ ) are given in ppm. Coupling constants (*J*) are reported in Hz. Infrared spectra were recorded on a FT-IR Bruker spectrophotometer and are reported in wavenumbers. Low Mass spectra analysis were recorded on an Agilent-HP GC-MS (E.I. 70eV).

Analytical thin layer chromatography was performed using 0.25 mm silica gel 60-F plates. Flash chromatography was performed using 70-200 mesh silica gel. Yields refer to chromatography and spectroscopically pure materials. Analytical standards of tetrazoles **2a**, **2d**, **2e** were purchased from Sigma Aldrich and used to value the purity of the corresponding synthesized tetrazoles. Sulphides **5a-f**, **5h**, **5j**, **5k**, **5m**, **5o**, **5p**, **5q**, **5r** were purchased from Sigma Aldrich. Sulphides **5g**, **5i**, **5l**, **5n**, **5s**, were synthesized as described below.

## 1.2 Synthesis of sulphides **5g**, **5i**, **5l**, **5n**, **5s**

### Synthesis of sulphide **5g**.

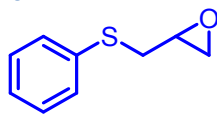

To a stirring suspension of NaH (1.45g, ~60%, 0.036 mol) in dry THF, (50 mL), cooled at 0°C, thiophenol (4g, 0.036) was slowly added in (15 mL of THF). After 1h, 2-(chloromethyl)oxirane (3.32g, 0.036 mol) was added dropwise in 15 mL of dry THF and the reaction was stirred at the same temperature for 6h. The resulting reaction mixture was warmed up to room temperature and filtered. The organic phase was washed with NaHCO<sub>3</sub> and brine. Once dried on Na<sub>2</sub>SO<sub>4</sub>, the solution was concentrated under reduced pressure to afford a yellow oil. Pure sulphide **5g** was obtained by flash column chromatography (silica gel, 80:20 hexane/ether) in 71% yield (4.2 g). <sup>1</sup>H NMR (400 MHz, CDCl<sub>3</sub>) δ: 7.40 (d, 2 H, *J* = 7.6 Hz), 7.27 (t, 2 H, *J* = 7.6 Hz), 7.19 (t, 1 H, *J* = 7.6 Hz), 3.14-3.10 (m, 2H), 2.91 (dd, 1H, *J* = 7.2 Hz, *J* = 15.2 Hz), 2.73 (t, 1H, *J* = 3.6 Hz), 2.48 (t, 1H, *J* = Hz); <sup>13</sup>C NMR (100 MHz, CDCl<sub>3</sub>) δ: 135.1, 130.0, 128.8, 126.5, 50.8, 47.1, 36.4. Spectroscopic data are in accordance with those previously reported.<sup>1</sup>

### Synthesis of sulphide **5i**.

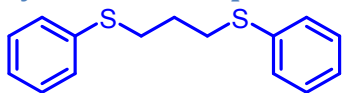

Sodium (0) (1.45g, 0.063 mol) was added (small chunks) in 100 ml of dry MeOH stirred at 0°C under Argon. The mixture was stirred until all the metal disappeared. Thiophenol (7g, 0.063 mol), (dissolved in 20 mL of dry MeOH) was added dropwise and the reaction mixture was stirred at 0°C for 1h. 1,3-dibromopropane (6.2g, 0.031 mol) was added dropwise (in 20 mL of MeOH). The cooling bath was removed and the reaction was stirred overnight at 50°C. The reaction mixture was diluted with Et<sub>2</sub>O (100 mL) and filtered. The resulting clear solution was washed with NaOH 2M (50 mL) and brine. The organic layer was dried on Na<sub>2</sub>SO<sub>4</sub> and filtered. The clear organic phase was concentrated under reduced pressure and the obtained oil was distilled at low pressure. Pure 1,3-bis(diphenylthio)propane **7i** was afforded as colourless oil in 85% yield (6.8g). <sup>1</sup>H NMR (400 MHz, CDCl<sub>3</sub>) δ: 7.39-7.33 (m, 4H), 7.28 (t, 4H, *J* = 7.2 Hz), 7.19 (t, 2H, *J* = 7.2 Hz), 3.06 (t, 4H, *J* = 7.2 Hz), 1.98 (t, 2H, *J* = 7.2 Hz) ppm; <sup>13</sup>C NMR (100 MHz, CDCl<sub>3</sub>) δ: 136.0, 129.3, 128.9, 126.0, 32.4, 28.3 ppm. Spectroscopic data are in accordance with those previously reported.<sup>2</sup>

### Synthesis of sulphide **5l**.

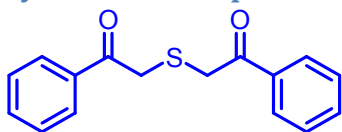

To a solution of α-bromoacetophenone (5g, 0.025g), in dry THF (70 mL), Na<sub>2</sub>S was added and the suspension was stirred at reflux overnight. The reaction mixture was cooled to room temperature and filtered. The solid was diluted

with CH<sub>2</sub>Cl<sub>2</sub> (100 mL) and washed with brine. The organic phase was dried with Na<sub>2</sub>SO<sub>4</sub> and concentrated under reduced pressure to afford a yellow solid that was recrystallized by MeOH/hexane to afford sulphide **5l** in 60% yield (4.0g). <sup>1</sup>H NMR (400 MHz, CDCl<sub>3</sub>) δ: 7.96 (d, 4 H, *J* = 7.5 Hz), 7.57 (t, 2 H, *J* = 7.5 Hz), 7.46 (t, 4 H, *J* = 7.5 Hz), 3.98 (s, 6H) ppm. <sup>13</sup>C NMR (100 MHz, CDCl<sub>3</sub>) δ: 194.1, 135.4, 133.5, 128.7, 128.6, 37.6 ppm. Spectroscopic data are in accordance with those previously reported.<sup>3</sup>

### Synthesis of sulphide **5n**.

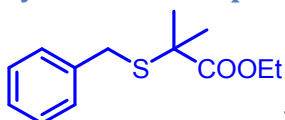

To a stirring solution of phenylmethanethiol (4g, 0.032 mol) in THF, (60 mL), K<sub>2</sub>CO<sub>3</sub> (8.83g, 0.064 mol) was added. After 30 min. ethyl 2-Chloro-2-methylpropanoate (7.2g, 0.048 mol) was added dropwise in 20 mL of dry THF and the reaction was warmed up to reflux for 14h. The resulting reaction mixture was cooled to room temperature and filtered. The organic phase was washed with brine. Once dried on Na<sub>2</sub>SO<sub>4</sub>, the solution was concentrated under reduced pressure to afford a yellow oil. Pure sulphide **5n** was obtained by flash column chromatography (silica gel, 80:20 hexane/ether) in 58% yield (4.4 g). <sup>1</sup>H NMR (500 MHz, CDCl<sub>3</sub>) δ: 7.30-7.29 (m, 5 H), 4.21-4.08 (m, 2 H), 3.86 (dd, 1 H, *J* = 1.2 Hz, *J* = 12.8 Hz), 3.67 (dd, 1H, *J* = 1.2 Hz, *J* = 12.8 Hz), 1.55 (d, 3H, *J* = 1.6 Hz), 1.53 (d, 3H, *J* = 1.6 Hz), 1.26 (dt, 3H, *J* = 1.6, 6.8 Hz) ppm; <sup>13</sup>C NMR (125 MHz, CDCl<sub>3</sub>) δ: 171.1, 131.0, 130.3, 129.9, 128.7, 128.1, 61.7, 55.1, 21.5, 15.7, 14.0 ppm. Spectroscopic data are in accordance with those previously reported.<sup>4</sup>

### Synthesis of sulphide **5s**.

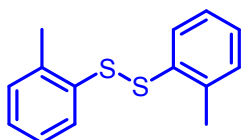

To a stirring solution of 2-Methyl-benzenethiol (5g, 0.040 mol) in MeOH, (50 mL), air was bubbled for 4 days at room temperature. The resulting reaction mixture was concentrated under reduced pressure. Pure sulphide **5s** was obtained by flash column chromatography (silica gel, 95:5-90:10 hexane/ether) in 42% yield (2.08 g). FTIR (KBr) cm<sup>-1</sup> v: 3007, 2989, 2884, 1102, 1023. <sup>1</sup>H NMR (500 MHz, CDCl<sub>3</sub>) δ: 7.50 (t, 2 H, *J* = 6.0 Hz), 7.14-7.10 (m, 6 H), 2.41 (s, 6 H) ppm; <sup>13</sup>C NMR (125 MHz, CDCl<sub>3</sub>) δ: 137.4, 135.4, 130.4, 128.7, 127.3, 126.6, 19.9 ppm. Ms *m/z*:(M<sup>+</sup>246, (68%), 211 (10%), 123 (100%), 77 (33%), 45 (80%).

### 1.3 Synthesis of sulfoxides 6a-6t.

#### General procedure for the synthesis of sulfoxides 6a-6t

To a 0.3 M solution of sulphide **5a** and tetrazole **2a** (5 mol. %) in CH<sub>2</sub>Cl<sub>2</sub> (3.0 mL), *t*BuOOH (5.5 M in decane 1.1 eq.) was added in one injection and the resulting mixture was stirred at room temperature and followed by Gc-Ms until completion (6/7 ratio >99: <1). The reaction mixture was filtered and the filtrate was washed two times with 5 mL of CH<sub>2</sub>Cl<sub>2</sub>. The organic phase was concentrated under reduced pressure. Pure sulfoxide **6a** was obtained by flash column chromatography (silica gel, 90:10 hexane/ether) in 92% yield.

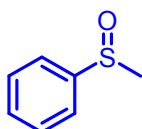

**Sulfoxide 6a** Colourless oil. <sup>1</sup>H NMR (500 MHz, CDCl<sub>3</sub>) δ: 7.62-7.60 (m, 2 H), 7.48-7.46 (m, 3 H), 2.68 (s, 3 H) ppm; <sup>13</sup>C NMR (125 MHz, CDCl<sub>3</sub>) δ: 145.6, 130.8, 129.2, 123.3, 43.8 ppm. Ms *e/z*:(M<sup>+</sup>140, (100%), 125 (98%), 97 (60%), 77 (50%), 51 (35%). Spectroscopic data are in accordance with those previously reported.<sup>5</sup>

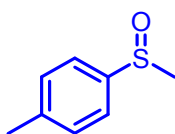

**Sulfoxide 6b**. Colourless oil. <sup>1</sup>H NMR (500 MHz, CDCl<sub>3</sub>) δ: 7.36 (d, 2 H, *J* = 8.5 Hz), 7.14 (d, 2 H *J* = 8.5 Hz), 2.51 (s, 3 H), 2.22 (s, 3H) ppm; <sup>13</sup>C NMR (125 MHz, CDCl<sub>3</sub>) δ: 142.1, 140.0, 129.4, 122.9, 43.4, 20.8 ppm. Ms *e/z*: (M<sup>+</sup>154, (64%), 139 (100%), 111 (8%), 91 (30%), 30 (24%), 63 (15%). Spectroscopic data are in accordance with those previously reported.<sup>6</sup>

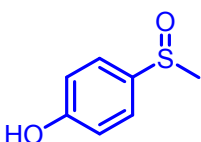

**Sulfoxide 6c**. White solid. FTIR (KBr) cm<sup>-1</sup> v: 3415, 3060, 2905, 2331, 1574, 1555, 1471, 1444, 1306, 1021, 790. <sup>1</sup>H NMR (500 MHz, CDCl<sub>3</sub>) δ: 7.50 (d, 2 H, *J* = 8.5 Hz), 7.97 (d, 2 H, *J* = 8.5 Hz), 2.75 (s, 3 H) ppm; <sup>13</sup>C NMR (125 MHz, CDCl<sub>3</sub>) δ: 160.6, 133.1, 126.0, 116.8, 42.9 ppm. Ms *e/z*:(M<sup>+</sup>156, (31%), 141 (100%), 125 (10%), 109 (10%), 85 (9%), 65 (11%). Spectroscopic data are in accordance with those previously reported.<sup>6</sup>

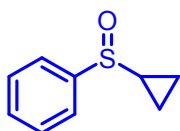

**Sulfoxide 6d**. Colourless oil. FTIR (KBr) cm<sup>-1</sup> v: 3056, 3007, 2872, 1478, 1045, 1022, 790, 750. <sup>1</sup>H NMR (500 MHz, CDCl<sub>3</sub>) δ: 7.64 (t, 2 H, *J* = 7.5 Hz), 7.50-7.46 (m, 3 H), 2.23 (ddd, 1 H, *J* = 5 Hz, *J* = 8 Hz, 13 Hz), 1.20 (dt, 1H, *J* = 5 Hz, *J* = 15 Hz), 1.03-0.99 (m, 1H), 0.98-0.93 (m, 2H) ppm; <sup>13</sup>C NMR (125 MHz, CDCl<sub>3</sub>) δ: 144.7, 130.6, 128.9, 123.7, 33.5, 3.1, 2.4 ppm. Ms *e/z*:(M<sup>+</sup>166, (10%), 150 (22%), 135 (28%), 125 (100%), 117 (53%), 109 (35%), 77 (41%), 65 (33%), 62 (65%). Spectroscopic data are in accordance with those previously reported.<sup>7</sup>

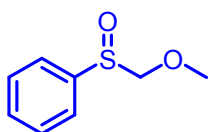

**Sulfoxide**

**6e.**

White

solid.

FTIR

(KBr)

cm<sup>-1</sup>

v: 3057, 2943, 2892, 2830, 1444, 1189, 1110, 1040, 752. <sup>1</sup>H NMR (400 MHz, CDCl<sub>3</sub>) δ: 7.65-7.62 (m, 2 H), 7.54-7.51 (m, 3 H), 4.39 (AB q, 2H, *J* = 10 Hz), 3.65 (s, 3 H) ppm; <sup>13</sup>C NMR (100 MHz, CDCl<sub>3</sub>) δ: 140.6, 131.0, 128.9, 124.0, 93.9, 60.57 ppm. Ms *e/z*:(M<sup>+</sup>) 170, (18%), 155 (30%), 138 (61%), 125 (100%), 109 (43%), 77 (47%), 65 (39%), 62 (65%). Spectroscopic data are in accordance with those previously reported.<sup>8</sup>

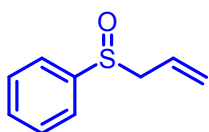

**Sulfoxide 6f.**

Colourless oil. <sup>1</sup>H NMR (500 MHz, CDCl<sub>3</sub>) δ: 7.59-7.57 (m, 2 H), 7.51-7.47 (m, 3 H), 5.63 (ddt, 1 H, *J* = 7.5 Hz, *J* = 10 Hz, 17.5 Hz), 5.30 (d, 1H, *J* = 10 Hz), 5.17 (dd, 1H, *J* = 1 Hz, *J* = 17.5 Hz), 3.55 (dd, 1H, *J* = 7.5 Hz, *J* = 13 Hz), 3.48 (dd, 1H, *J* = 7.5 Hz, 13 Hz) ppm; <sup>13</sup>C NMR (125 MHz, CDCl<sub>3</sub>) δ: 142.9, 131.0, 128.9, 125.2, 124.2123.7, 60.8 ppm. Ms *e/z*: (M<sup>+</sup>) 166, (50%), 149 (10%), 125 (100%), 118 (41%), 97 (40%), 77 (45%), 77 (41%), 41 (58%). Spectroscopic data are in accordance with those previously reported.<sup>9</sup>

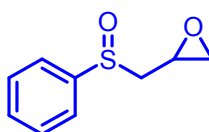

**Sulfoxide 6g.**

Colourless oil (1:1 mixture of diastereoisomers). FTIR (KBr) cm<sup>-1</sup> v: 3057, 2999, 2908, 2335, 1477, 1444, 1088, 1037, 848, 749. <sup>1</sup>H NMR *syn* (500 MHz, CDCl<sub>3</sub>) δ: 7.64-7.60 (m, 2 H), 7.50-7.47 (m, 3 H), 2.93 (dd, 1 H, *J* = 5 Hz, *J* = 15 Hz), 2.81 (t, 1H, *J* = 4.5 Hz), 2.78 (t, 1H, *J* = 5 Hz), 2.63 (dd, 1H, *J* = 2 Hz, *J* = 5 Hz), 2.50 (dd, 1H, *J* = 2.5 Hz, *J* = 4.5 Hz) ppm; <sup>13</sup>C NMR (125 MHz, CDCl<sub>3</sub>) δ: 142.6, 131.2, 129.2, 123.7, 58.7, 46.2, 45.3 ppm. Ms *e/z*:(M<sup>+</sup>)182, (10%), 164 (61%), 166 (18%), 125 (100%), 109 (50%), 77 (46%), 57 (21%).

<sup>1</sup>H NMR *anti* (500 MHz, CDCl<sub>3</sub>) δ: 7.64-7.60 (m, 2 H), 7.50-7.47 (m, 3 H), 3.32 (ddt, 1 H, *J* = 2.5 Hz, *J* = 4 Hz, *J* = 7 Hz), 3.07-3.02 (m, 2H), 2.86 (dd, 1H, *J* = 7 Hz, *J* = 13.5 Hz), 2.96 (dd, 1H, *J* = 7 Hz, *J* = 18.5 Hz) ppm; <sup>13</sup>C NMR (125 MHz, CDCl<sub>3</sub>) δ: 143.4, 131.2, 129.2, 123.9, 60.8, 46.9, 46.0 ppm. Ms *e/z*:(M<sup>+</sup>)182, (12%), 164 (58%), 165 (24%), 125 (100%), 109 (57%), 77 (40%), 57 (27%). Spectroscopic data are in accordance with those previously reported.<sup>10</sup>

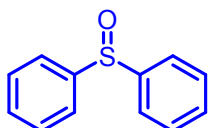

**Sulfoxide 6h.**

White solid. FTIR (KBr) cm<sup>-1</sup> v: 3057, 1475, 1091, 1048, 910. <sup>1</sup>H NMR (500 MHz, CDCl<sub>3</sub>) δ: 7.64 (dd, 4H, *J* = 1.5 Hz, *J* = 8 Hz), 7.44-7.40 (m, 6H). <sup>13</sup>C NMR (125 MHz, CDCl<sub>3</sub>) δ: 145.4, 130.8, 129.1, 124.5 ppm. Ms *e/z*: (M<sup>+</sup>)202, (100%), 185 (21%), 173 (32%), 154 (70%), 125 (13%), 109 (60%), 77 (35%), 51 (33%).

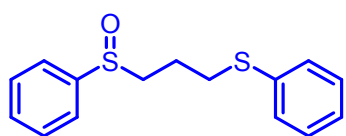

**Sulfoxide 6i.** Colourless oil. FTIR (KBr)  $\text{cm}^{-1}$

v: 3056, 2938, 2866, 1582, 1479, 1441, 1303, 1255, 1086, 1044, 997.  $^1\text{H}$  NMR (500 MHz,  $\text{CDCl}_3$ )  $\delta$ : 7.49 (d, 1H,  $J = 2.5$  Hz); 7.47 (d, 1H,  $J = 2.0$  Hz), 7.42-7.38 (m, 3H), 7.20-7.17 (m, 2H), 7.16-7.15 (m, 2H), 7.10-7.07 (m, 1H), 2.93-2.87 (m, 1H), 2.91 (t, 2H,  $J = 7$  Hz), 2.77 (ddd, 1H,  $J = 5$  Hz,  $J = 9$  Hz,  $J = 18.5$ Hz), 2.01 (m, 1H), 1.82 (m, 1H) ppm;  $^{13}\text{C}$  NMR (125 MHz,  $\text{CDCl}_3$ )  $\delta$ : 143.4, 135.1, 130.8, 129.8, 129.1, 128.8, 126.3, 123.8, 55.2, 32.8, 21.5 ppm. Ms  $m/z$ : ( $\text{M}^+$ ) 276 (38%), 170 (60%), 167 (51%), 109 (100%), 77 (70%). Spectroscopic data are in accordance with those previously reported.<sup>5</sup>

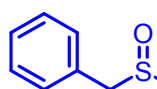

**Sulfoxide 6j.** Colourless oil.  $^1\text{H}$  NMR (400 MHz,  $\text{CDCl}_3$ )  $\delta$ : 7.35-7.23 (m, 5H), 4.00 (d,

1H,  $J = 12.8$  Hz), 3.88 (d, 1H,  $J = 12.8$  Hz), 2.41 (s, 3 H) ppm;  $^{13}\text{C}$  NMR (100 MHz,  $\text{CDCl}_3$ )  $\delta$ : 130.1, 129.7, 128.9, 128.5, 60.3, 37.3 ppm. Ms  $m/z$ : ( $\text{M}^+$ ) 154 (6%), 138 (6%), 121 (8%), 91 (100%), 65 (23%), 51 (15%). Spectroscopic data are in accordance with those previously reported.<sup>11</sup>

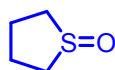

**Sulfoxide 6k.** Colourless oil.  $^1\text{H}$  NMR (400 MHz,  $\text{CDCl}_3$ )  $\delta$ : 2.93-2.84 (m, 4H), 2.61-2.40

(m, 2H), 2.23-2.02 (m, 2H) ppm;  $^{13}\text{C}$  NMR (100 MHz,  $\text{CDCl}_3$ )  $\delta$ : 53.7, 24.6 ppm. Ms  $m/z$ : ( $\text{M}^+$ ) 104, (100%), 88 (22%), 76 (57%), 62 (41%).

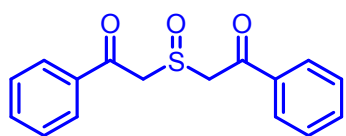

**Sulfoxide 6l.** White solid.  $^1\text{H}$  NMR (500 MHz,  $\text{CDCl}_3$ )  $\delta$ : 7.97 (t, 4H,  $J = 8$

Hz), 7.62 (t, 2H,  $J = 7.5$  Hz), 7.5 (m, 4H), 4.76 (d, 2H,  $J = 15$  Hz), 4.43 (d, 2H,  $J = 15$  Hz) ppm;  $^{13}\text{C}$  NMR (125 MHz,  $\text{CDCl}_3$ )  $\delta$ : 192.3, 136.1, 134.3, 128.8, 59.3 ppm. Ms  $m/z$ : ( $\text{M}^+$ ) 286 (51%), 181 (64%), 119 (43%), 105 (100%), 77 (65%). Spectroscopic data are in accordance with those previously reported.<sup>12</sup>

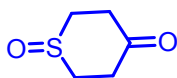

**Sulfoxide 6m.** White solid. FTIR (KBr)  $\text{cm}^{-1}$

v: 2981, 2683, 1725, 1658, 1462, 1325, 1217, 1067, 928.  $^1\text{H}$  NMR (500 MHz,  $\text{CDCl}_3$ )  $\delta$ : 3.34-3.25 (m, 4H), 2.87 (dt, 2H,  $J = 6$  Hz,  $J = 13$  Hz), 2.53-2.48 (m, 2H) ppm;  $^{13}\text{C}$  NMR (125 MHz,  $\text{CDCl}_3$ )  $\delta$ : 114.6, 47.2, 32.1 ppm. Ms  $m/z$ : ( $\text{M}^+$ ) 132 (5%), 104 (60%), 76 (8%), 55 (100%). Spectroscopic data are in accordance with those previously reported.<sup>13</sup>

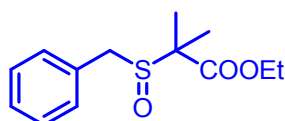

**Sulfoxide 6n.** Yellow oil. FTIR (KBr)  $\text{cm}^{-1}$  v: 3031, 2981, 2936, 1732, 1556,

1446, 1271, 1050, 1039.  $^1\text{H}$  NMR (400 MHz,  $\text{CDCl}_3$ )  $\delta$ : 7.34-7.30 (m, 5H), 4.17 (ddq, 2H,  $J = 3.6$  Hz,  $J = 7.2$  Hz,  $J = 22.4$  Hz), 3.80 (ABq, 2H,  $J = 12.8$  Hz), 1.58 (s, 3H), 1.56 (s, 3H), 1.29 (t, 3H,  $J = 7.2$  Hz) ppm.  $^{13}\text{C}$  NMR (100 MHz,  $\text{CDCl}_3$ )  $\delta$ : 171.1, 131.0, 129.9, 128.7, 128.1, 62.6, 61.7, 55.1, 21.5, 15.7, 14.0 ppm. Ms  $m/z$ : ( $\text{M}^+$ ) 254 (23%), 239 (10%), 225 (68%), 209 (43%), 181 (84%), 162 (52%), 123



(30%), 91 (100%), 77 (48%). Anal. Calcd for C<sub>13</sub>H<sub>18</sub>O<sub>3</sub>S: C, 61.39; H, 7.13; S, 12.61. Found: C, 61.14; H, 7.11; S, 12.57.

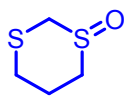

**Sulfoxide**

**6o.**

White

solid.

FTIR

(KBr)

cm<sup>-1</sup>

v: 2954, 2901, 2837, 2216, 1642, 1427, 1275, 1017, 919. <sup>1</sup>H NMR (500 MHz, CDCl<sub>3</sub>) δ: 3.98 (dd, 1H, *J* = 1.5 Hz, *J* = 12.5 Hz), 3.63 (d, 1H, *J* = 12.5 Hz), 3.30 (ddd, 1H, *J* = 3 Hz, *J* = 6 Hz, 13 Hz), 2.60 (ddt, 2H, *J* = 2.5 Hz, *J* = 18.5 Hz, *J* = 25.5 Hz), 2.54-2.46 (m, 2H), 2.21-2.13 (m, 1H) ppm. <sup>13</sup>C NMR (125 MHz, CDCl<sub>3</sub>) δ: 52.9, 50.4, 28.2, 27.0 ppm. Ms *m/z*: (M<sup>+</sup>136, (100%), 119 (12%), 106 (51%), 90 (64%), 73 (43%), 60 (37%), 45 (96%), 41 (80%). Spectroscopic data are in accordance with those previously reported.<sup>14</sup>

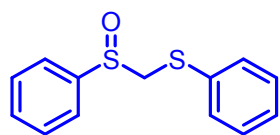

**Sulfoxide**

**6p.**

Colourless

liquid.

FTIR

(KBr)

cm<sup>-1</sup>

v: 3055, 2974, 2934, 2387, 1581, 1548, 1479, 1178, 1084, 1046, 743. <sup>1</sup>H NMR (400 MHz, CDCl<sub>3</sub>) δ: 7.70-7.68 (m, 2H), 7.49-7.48 (m, 3H), 7.44-7.43 (m, 2H), 7.30-7.25 (m, 3H), 4.13 (ABq, 2H, *J* = 13.6 Hz) ppm; <sup>13</sup>C NMR (100 MHz, CDCl<sub>3</sub>) δ: 142.6, 133.4, 131.5, 130.8, 129.1, 129.0, 127.6, 124.7, 60.8 ppm. Ms *m/z*: (M<sup>+</sup>) 246 (70%), 155 (38%), 137 (32%), 124 (100%), 109 (90%), 77 (53%). Spectroscopic data are in accordance with those previously reported.<sup>14</sup>

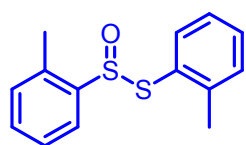

**Sulfoxide**

**6s.**

deliquescent

yellow

solid.

FTIR

(KBr)

cm<sup>-1</sup>

v: 3008, 2975, 2865, 1459, 1184, 1069, 911. <sup>1</sup>H NMR (500 MHz, CDCl<sub>3</sub>) δ: 7.74 (dd, 1H, *J* = 1.5 Hz, *J* = 8 Hz), 7.56 (dd, 1H, *J* = 1.0 Hz, *J* = 8.0 Hz), 7.38 (dd, 1H, 1.5 Hz, *J* = 7.5 Hz), 7.34 (d, 1H, *J* = 1.0 Hz), 7.33-7.32 (m, 1H), 7.32-7.31 (m, 1H), 7.30-7.20 (m, 2H), 2.51 (s, 3H), 2.37 (s, 3H) ppm; <sup>13</sup>C NMR (125 MHz, CDCl<sub>3</sub>) δ: 143.0, 138.3, 137.0, 134.1, 132.8, 131.4, 130.6, 130.2, 128.7, 126.7, 125.8, 124.2, 21.1, 18.2 ppm. Ms *m/z*: (M<sup>+</sup>) 262, (18%), 139 (100%), 123 (31%), 91 (40%), 65 (13%). Anal. Calcd for C<sub>14</sub>H<sub>14</sub>OS<sub>2</sub>: C, 64.08; H, 5.38; S, 24.44. Found: C, 63.99; H, 5.37; S, 24.46.

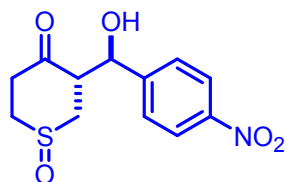

**Sulfoxide**

**6t.**

pale yellow solid. M.p. 81 °C; [α]<sup>27.2°C</sup><sub>D</sub> = +24 (conc. 0.034 in

MeOH); FTIR (KBr) cm<sup>-1</sup> v: 3507, 1774, 1196, 1067. <sup>1</sup>H NMR (500 MHz, DMSO-d<sub>6</sub>) δ: 8.19 (d, 2H, *J* = 8.5 Hz), 8.63 (d, 2H, *J* = 8.5 Hz), 5.88 (d, 1H, 4.5 Hz), 5.34 (t, 1H, *J* = 3.5 Hz), 3.68 (t, 1H, *J* = 13.5 Hz), 3.44-3.40 (m, 1H), 3.24 (m, 2H), 2.96 (t, 1H, *J* = 5.0 Hz), 2.94-2.85 (m, 1H), 2.72 (t, 1H, *J* = 5.0 Hz), 2.69 (t, 1H, *J* = 5.5 Hz) ppm; <sup>13</sup>C NMR (125 MHz, DMSO-d<sub>6</sub>) δ: 202.5, 151.0, 146.8, 127.5, 123.4, 67.9, 53.3, 48.8, 48.4, 37.8 ppm.

## 2. Spectroscopic NMR data

### 2.1 $^1\text{H}$ and $^{13}\text{C}$ NMR spectra data of compound 5g, 5i, 5l, 5n, 5s

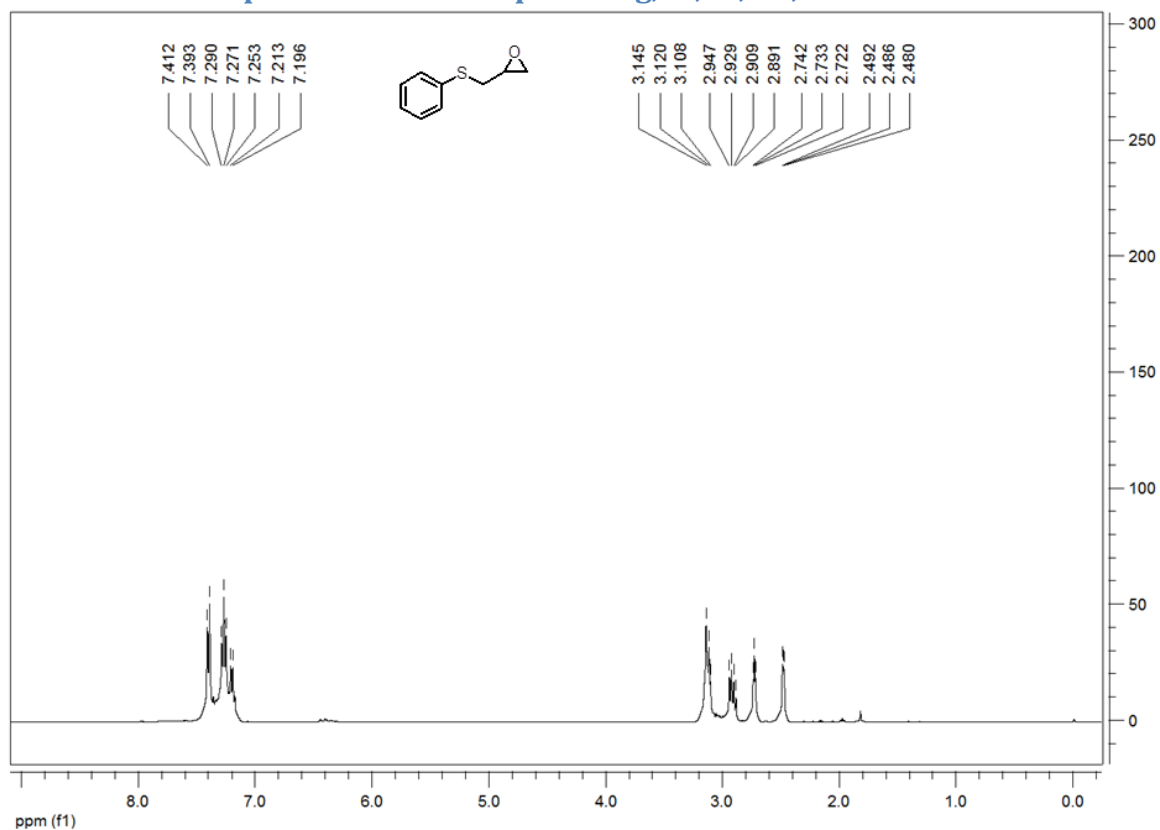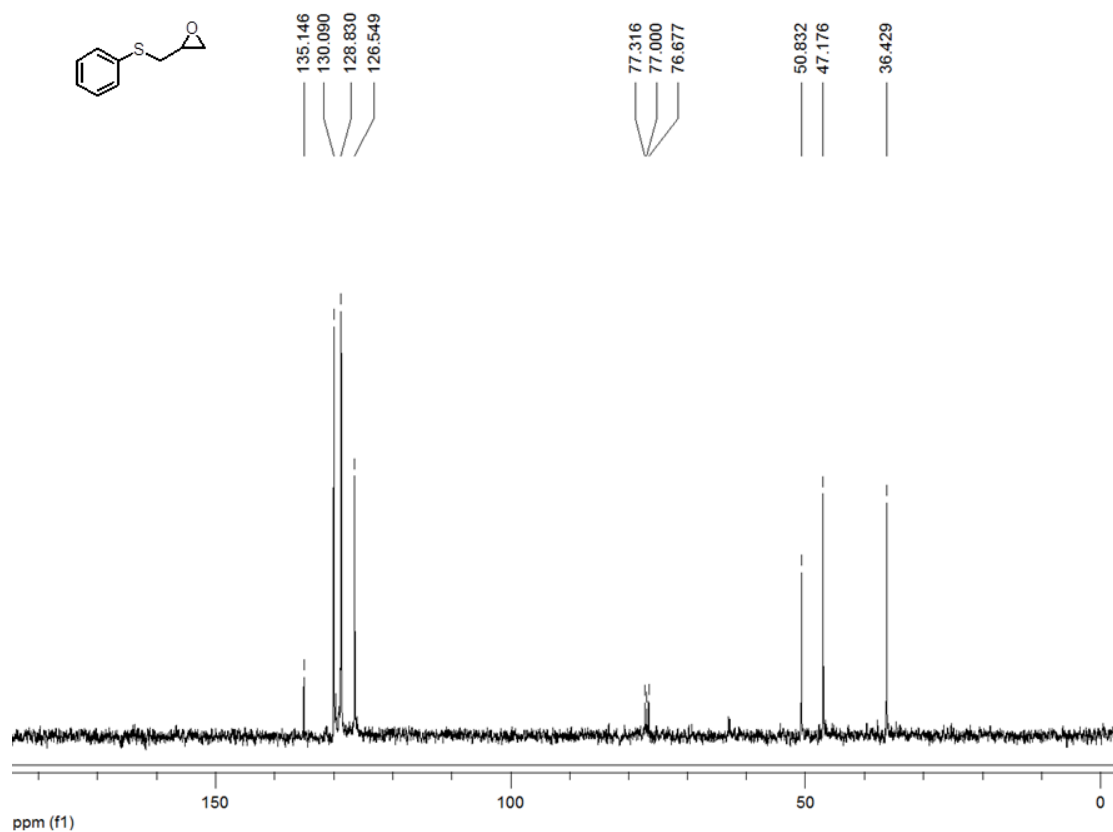

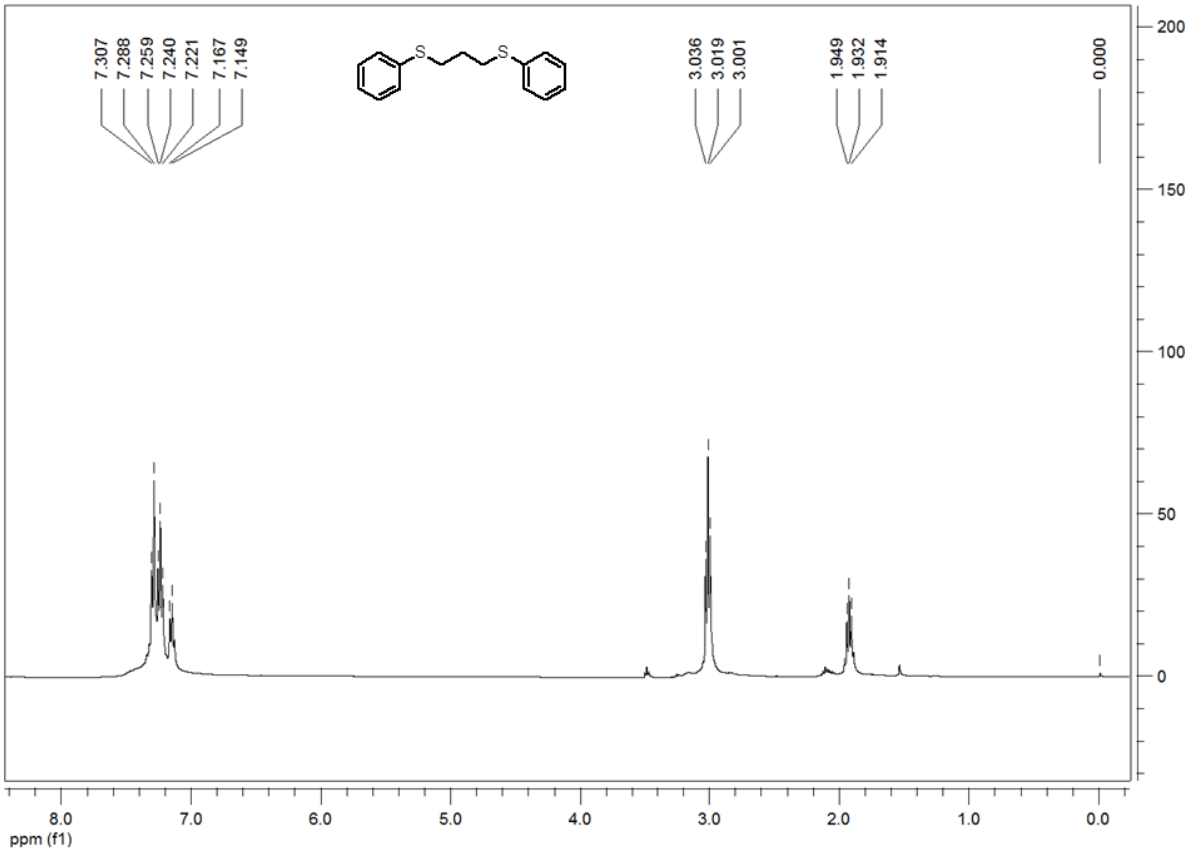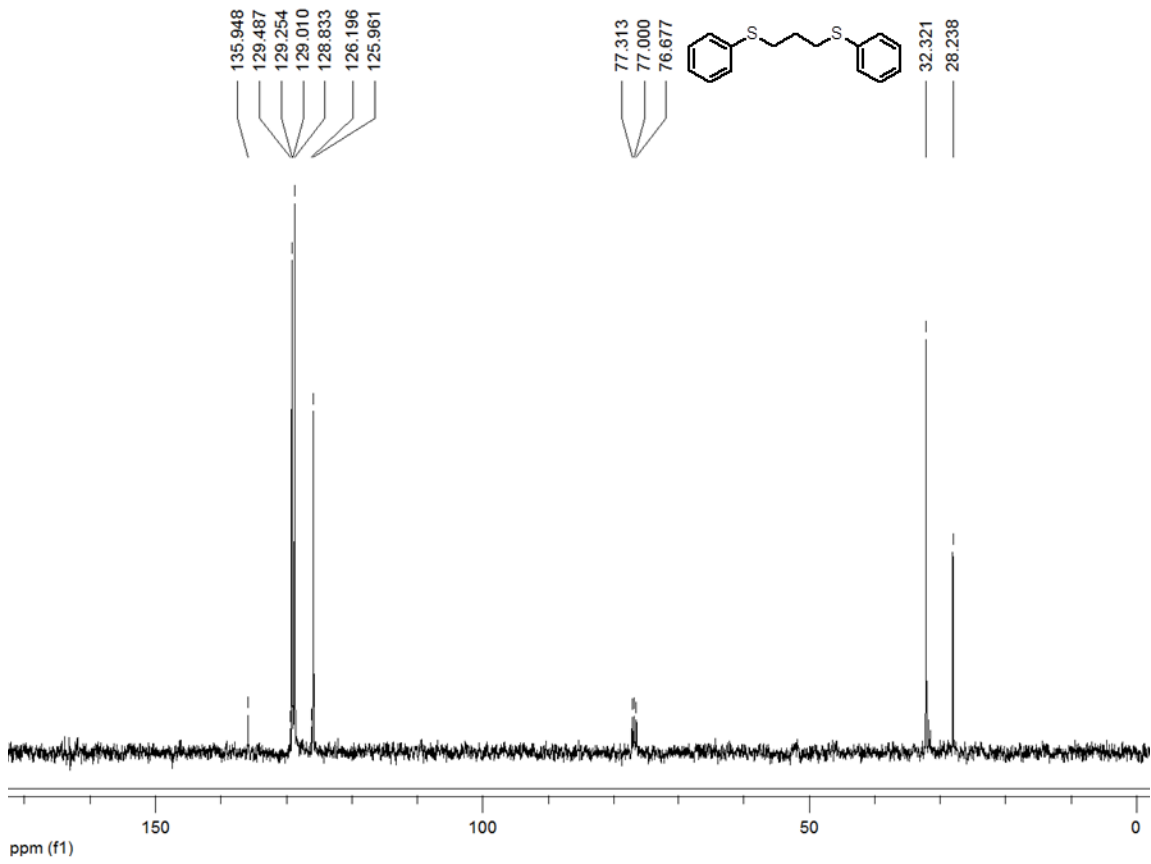

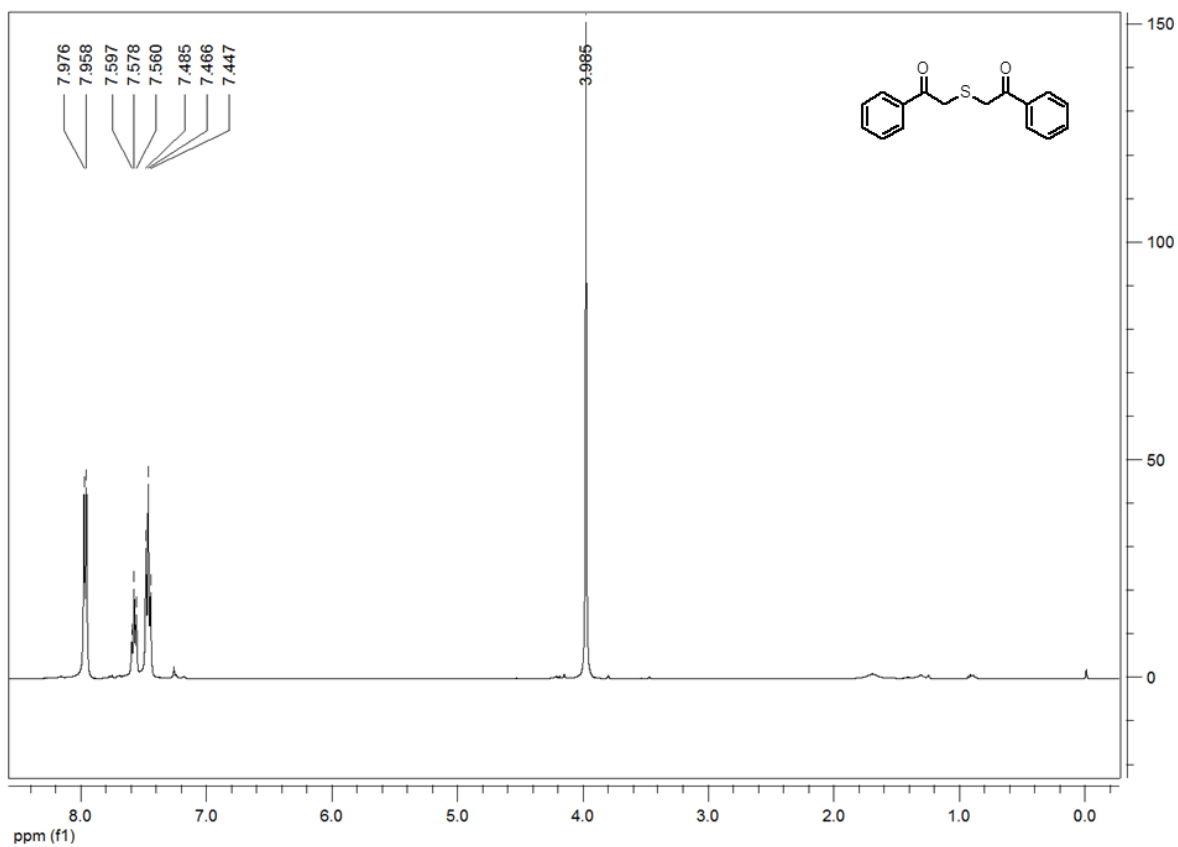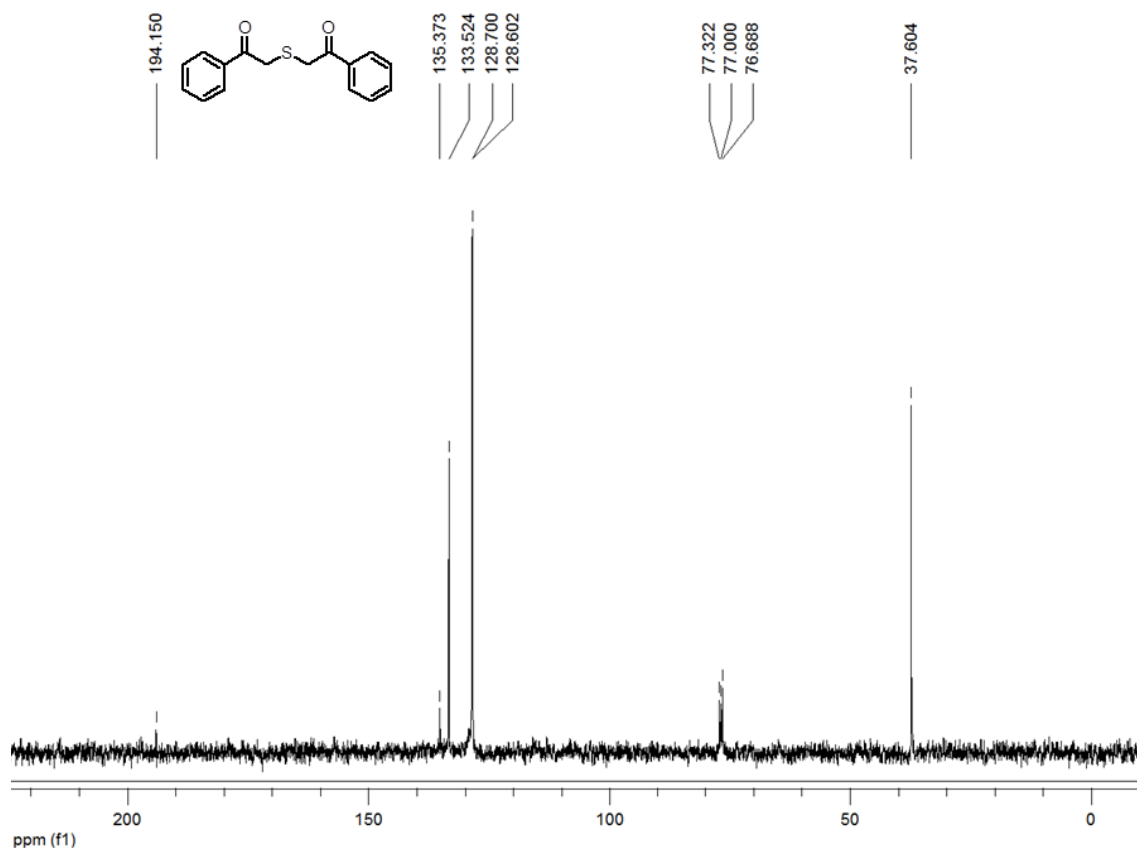

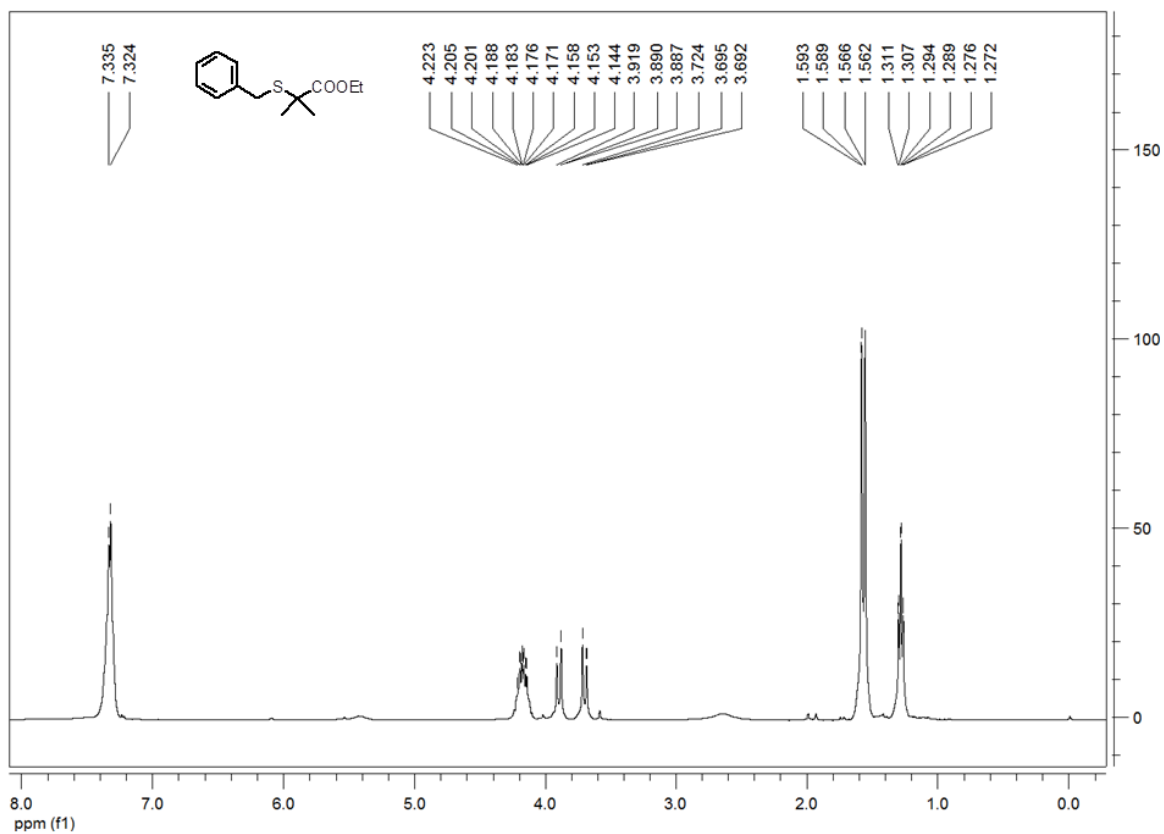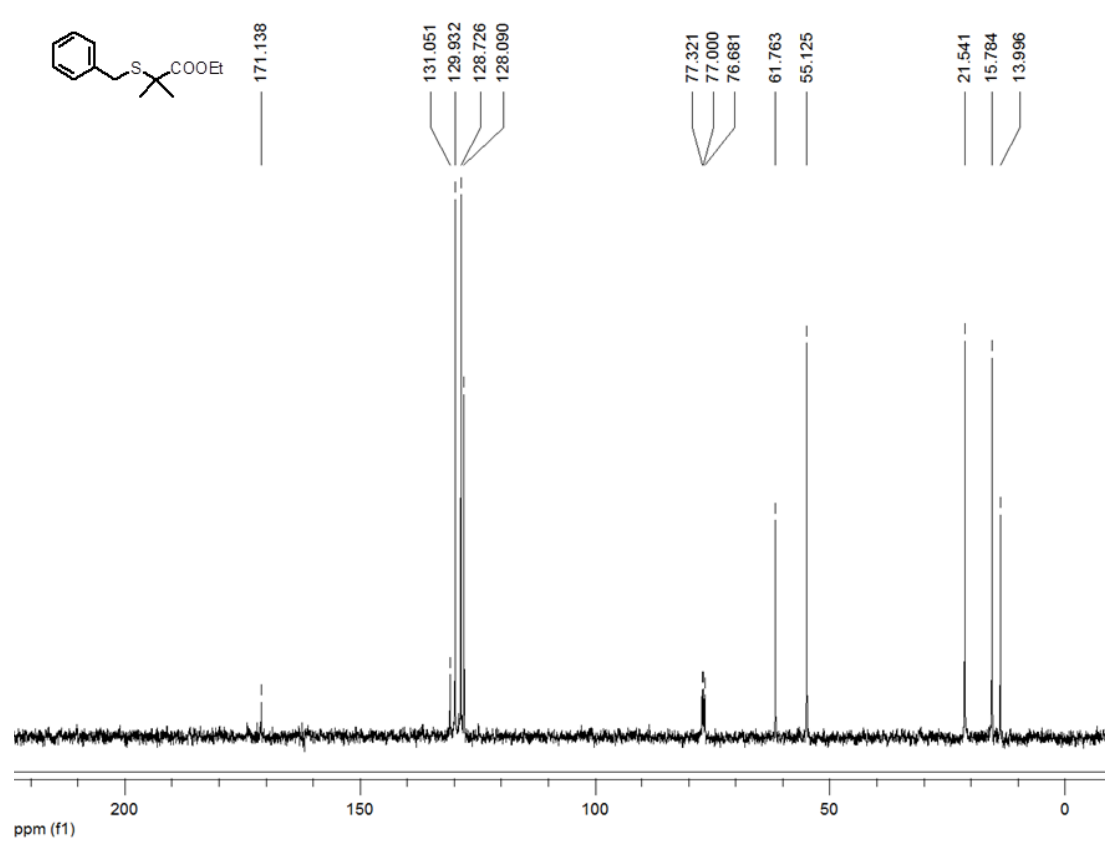

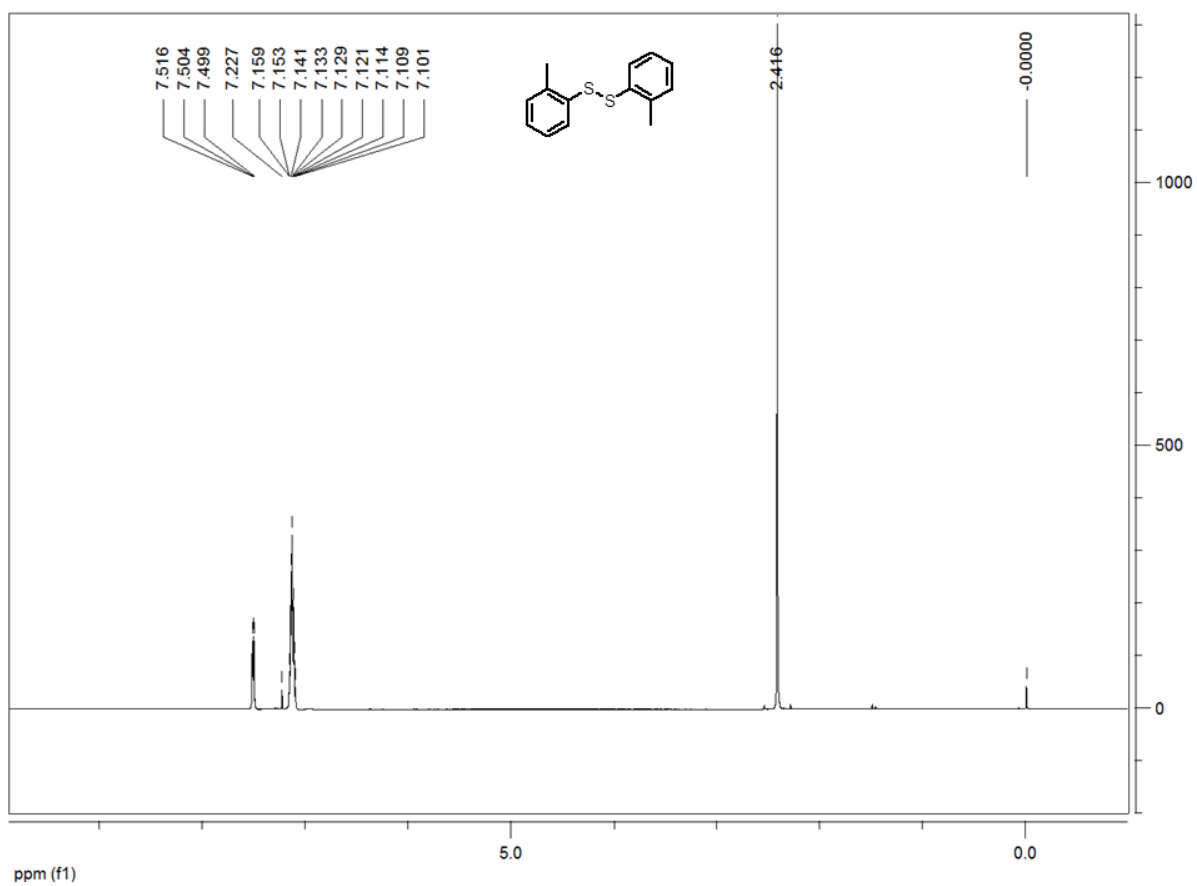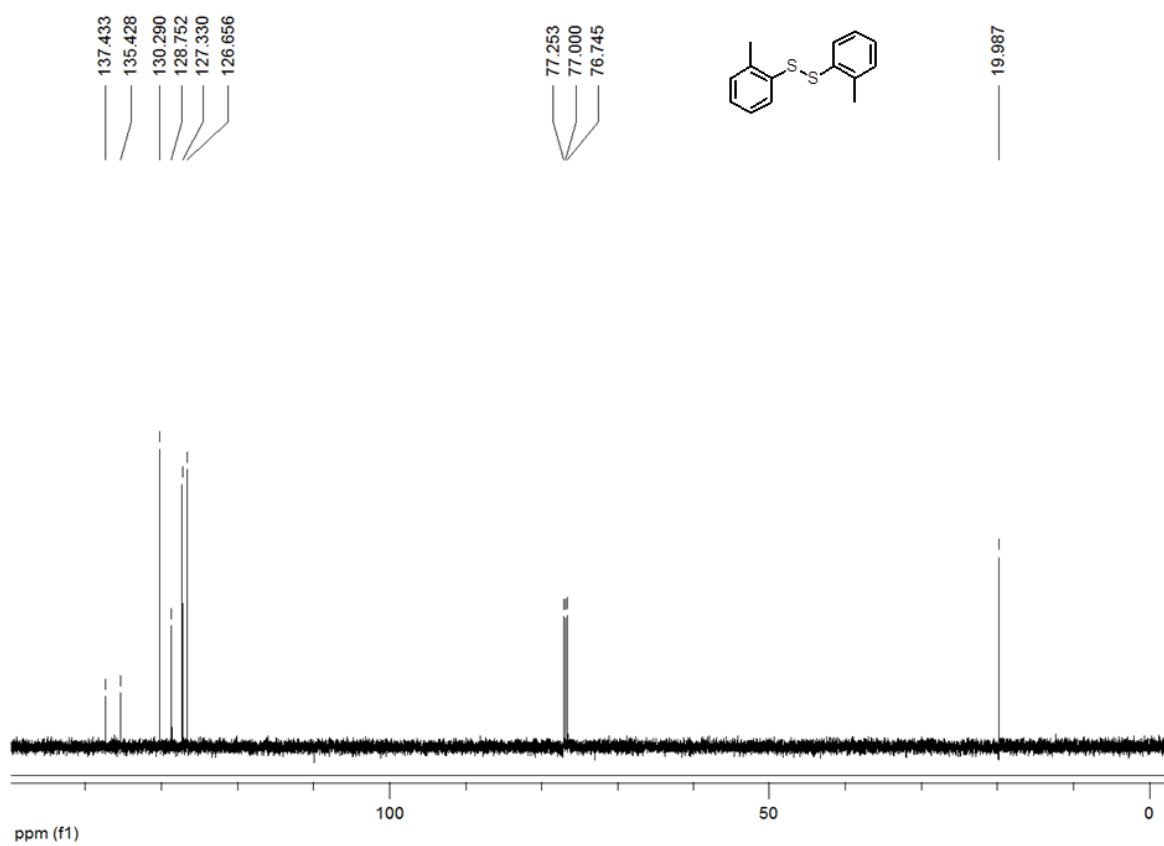

## 2.2 <sup>1</sup>H and <sup>13</sup>C NMR spectra data of compound 6a-6p, 6s, 6t

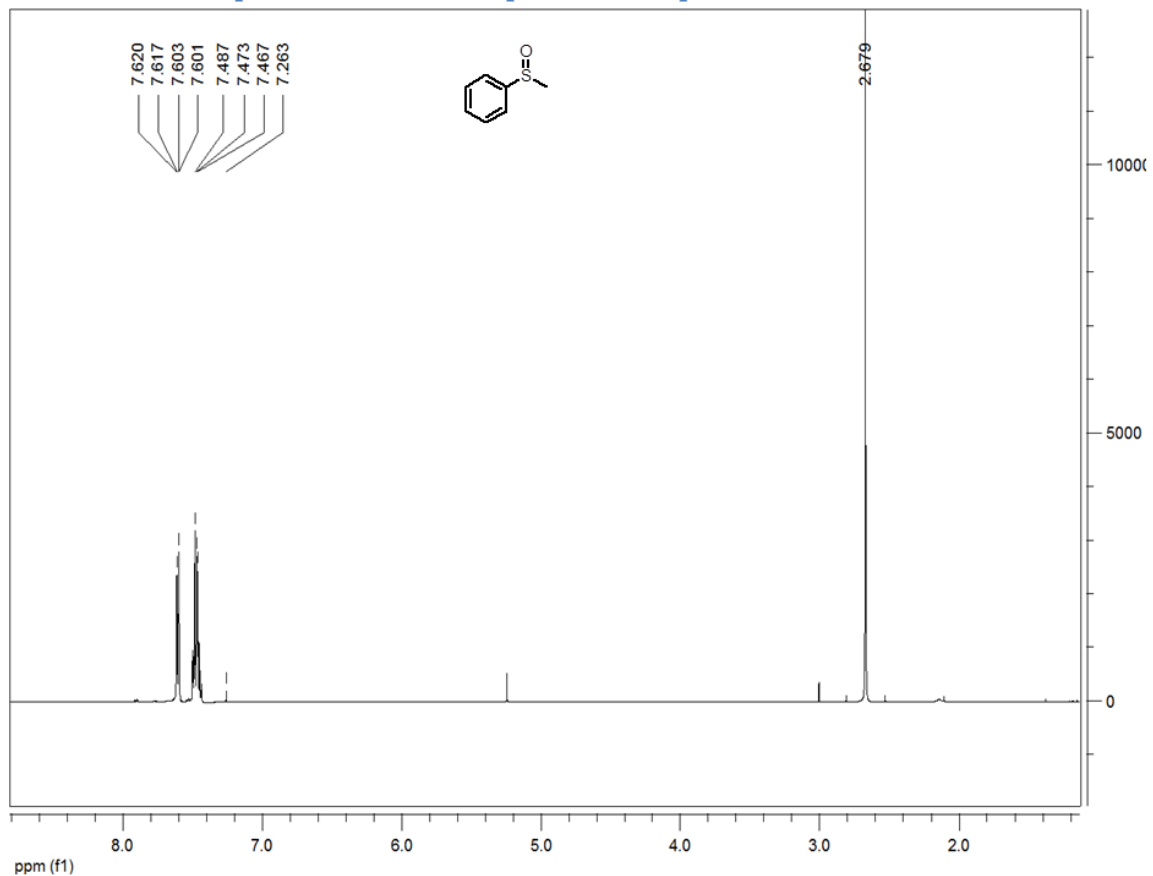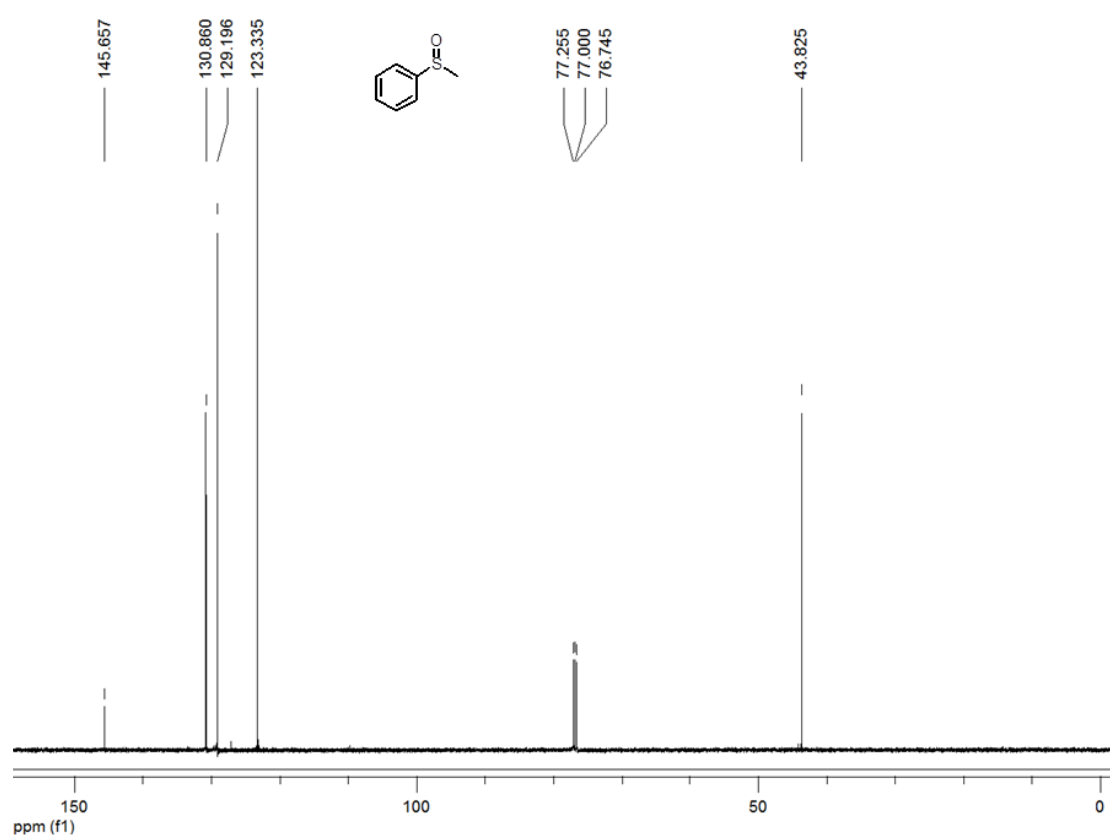

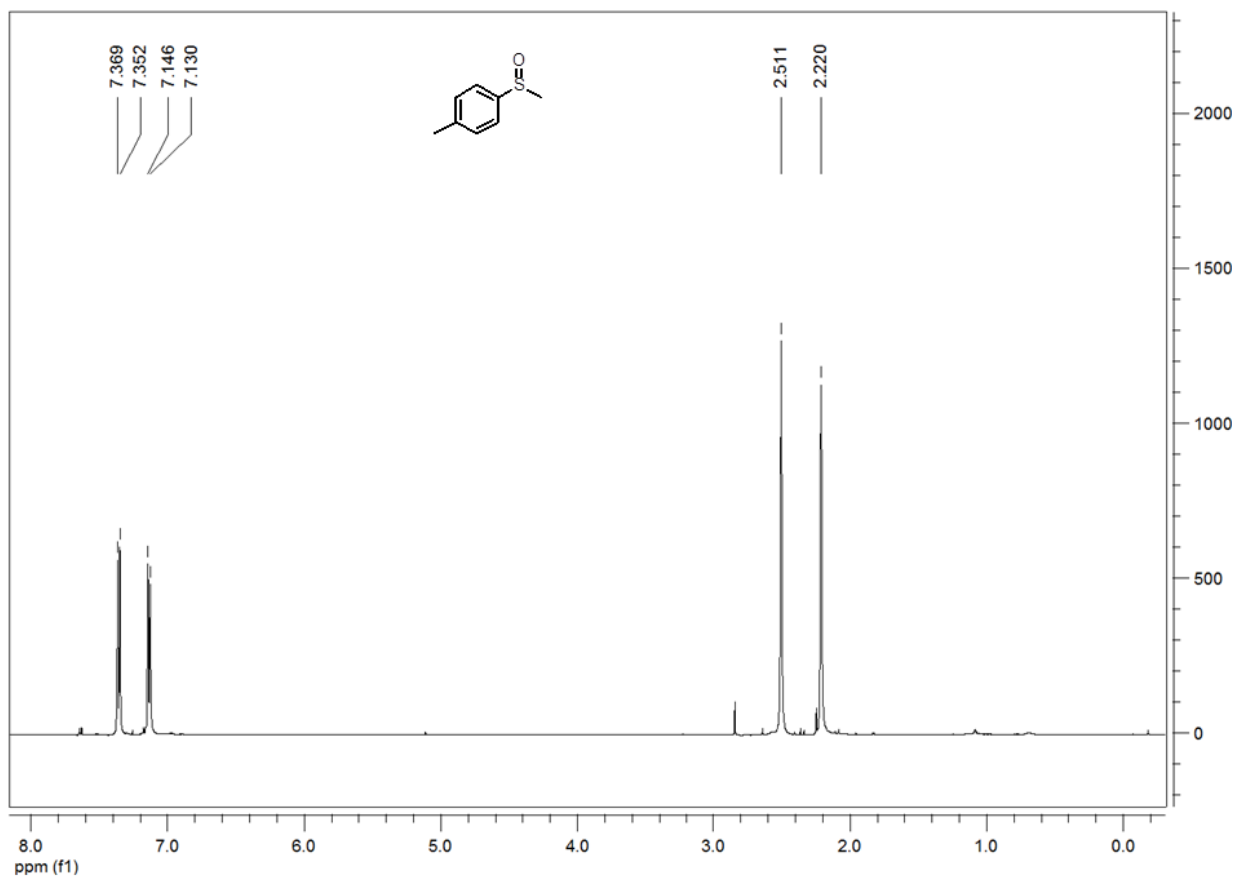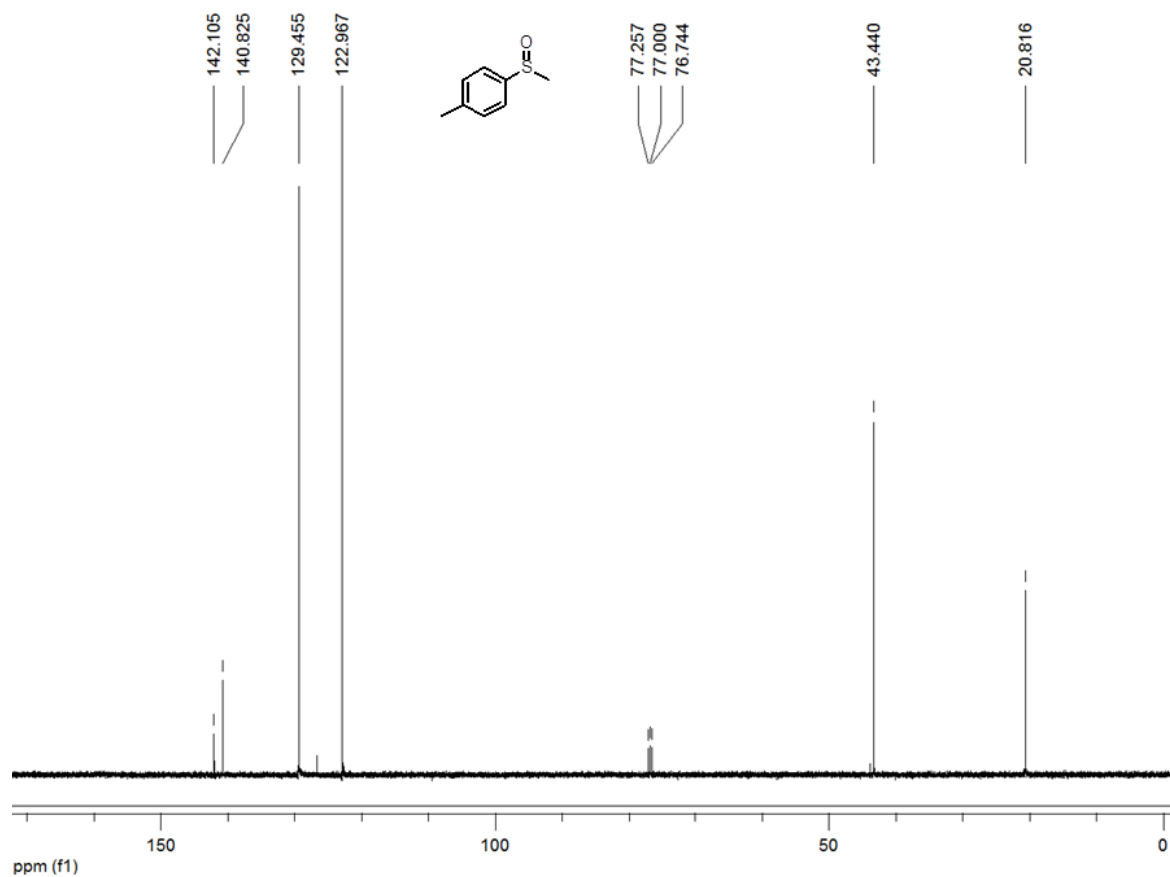



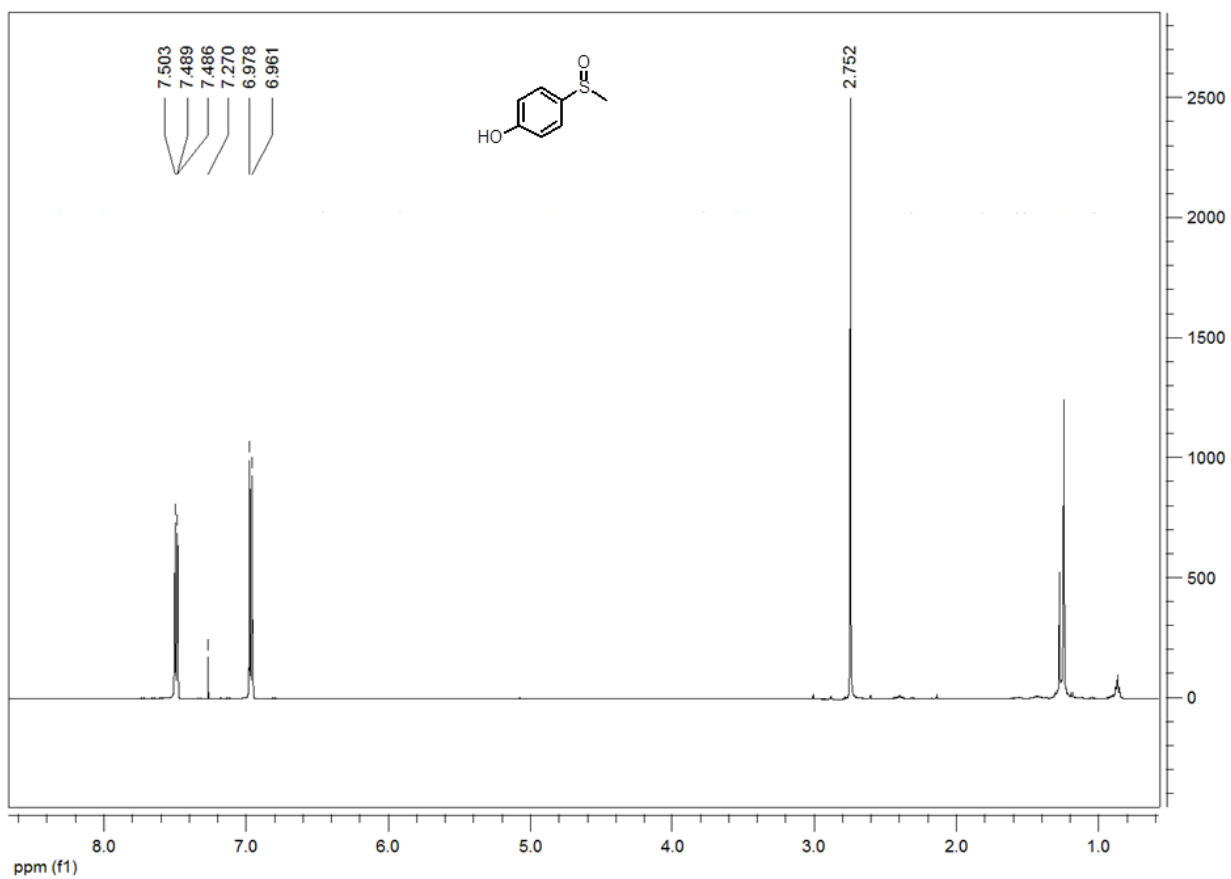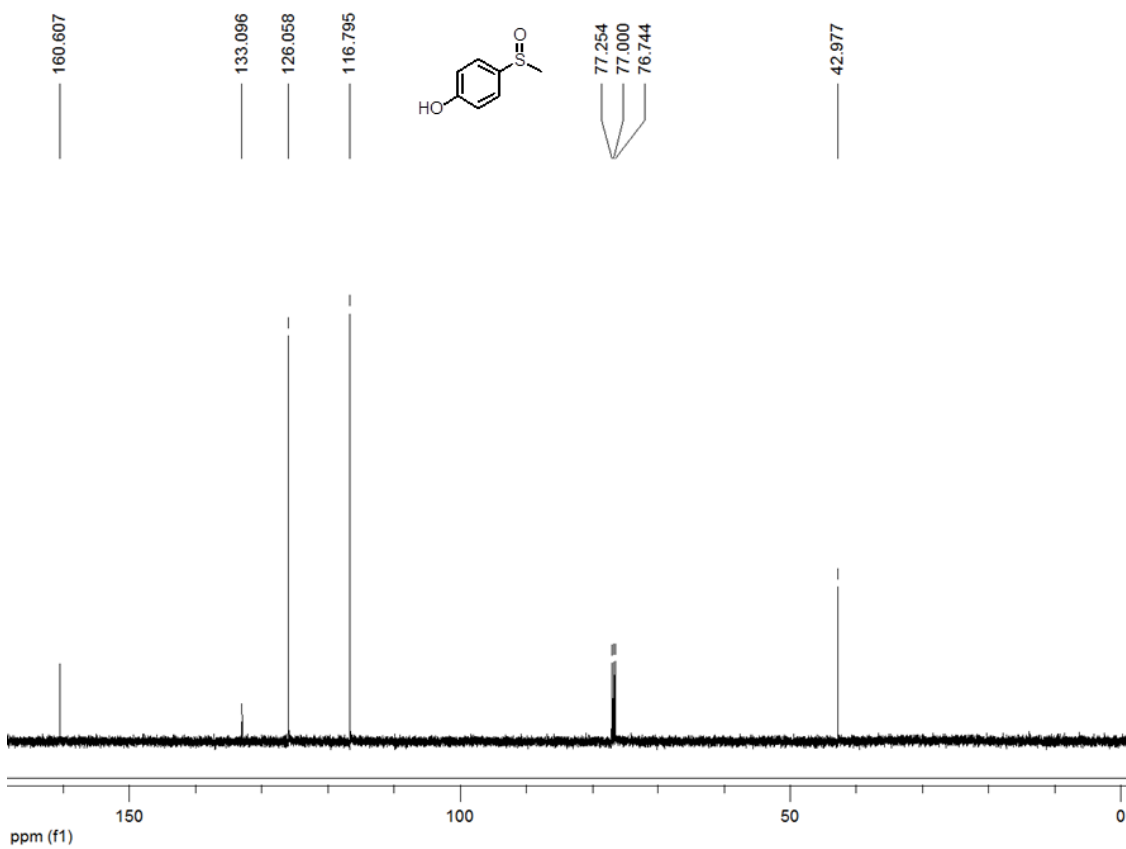

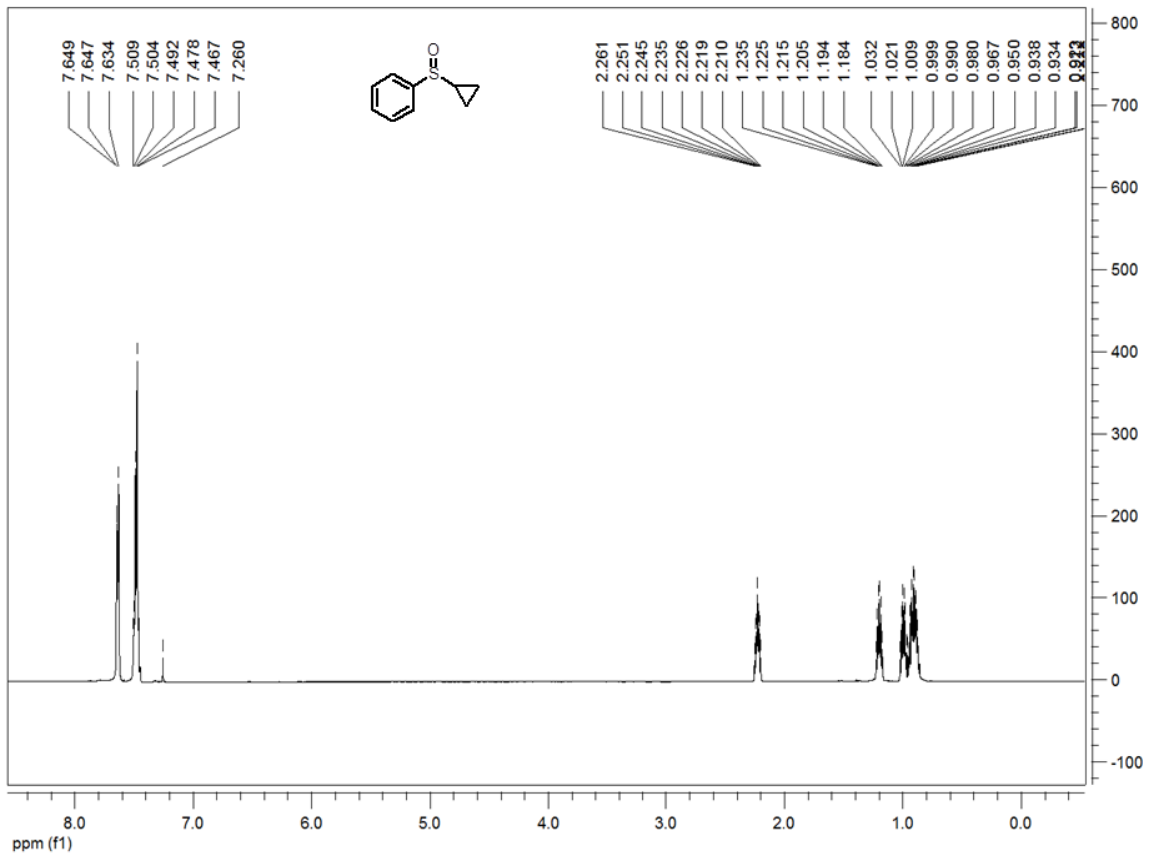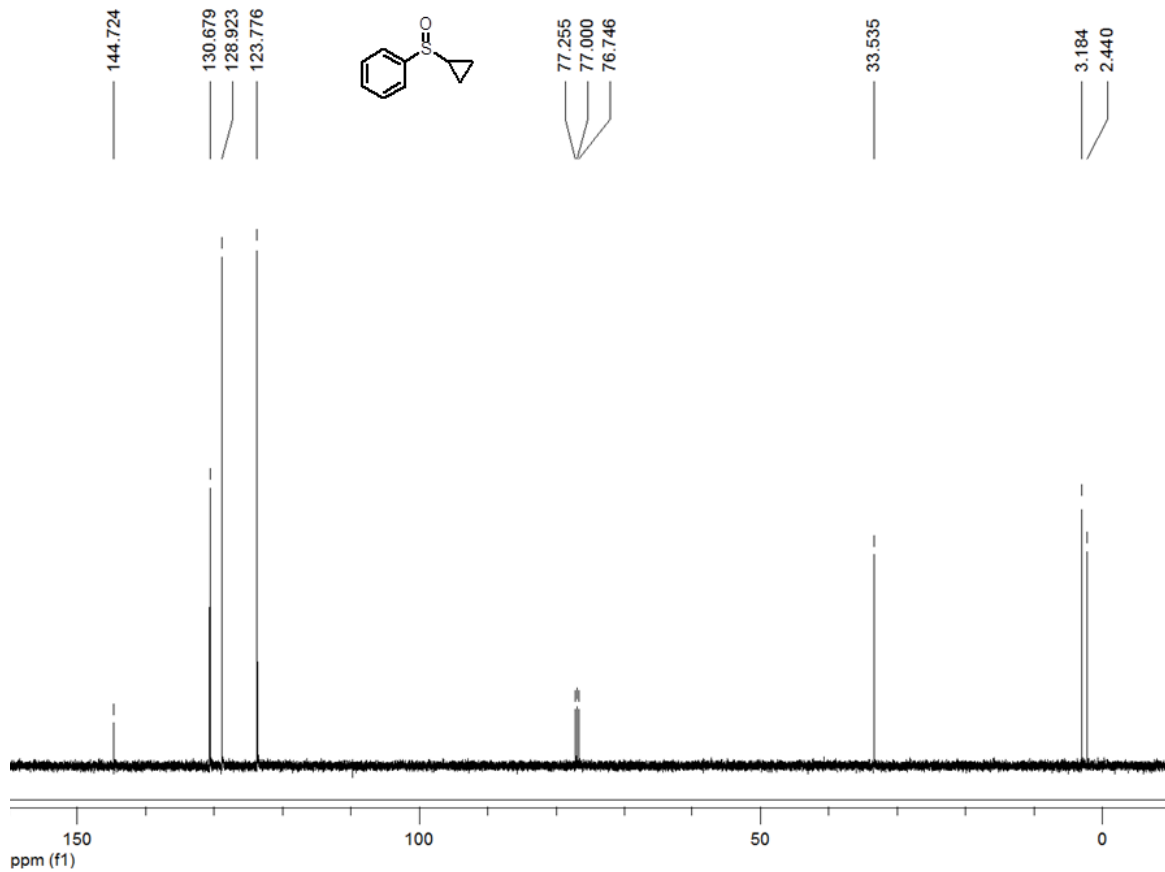

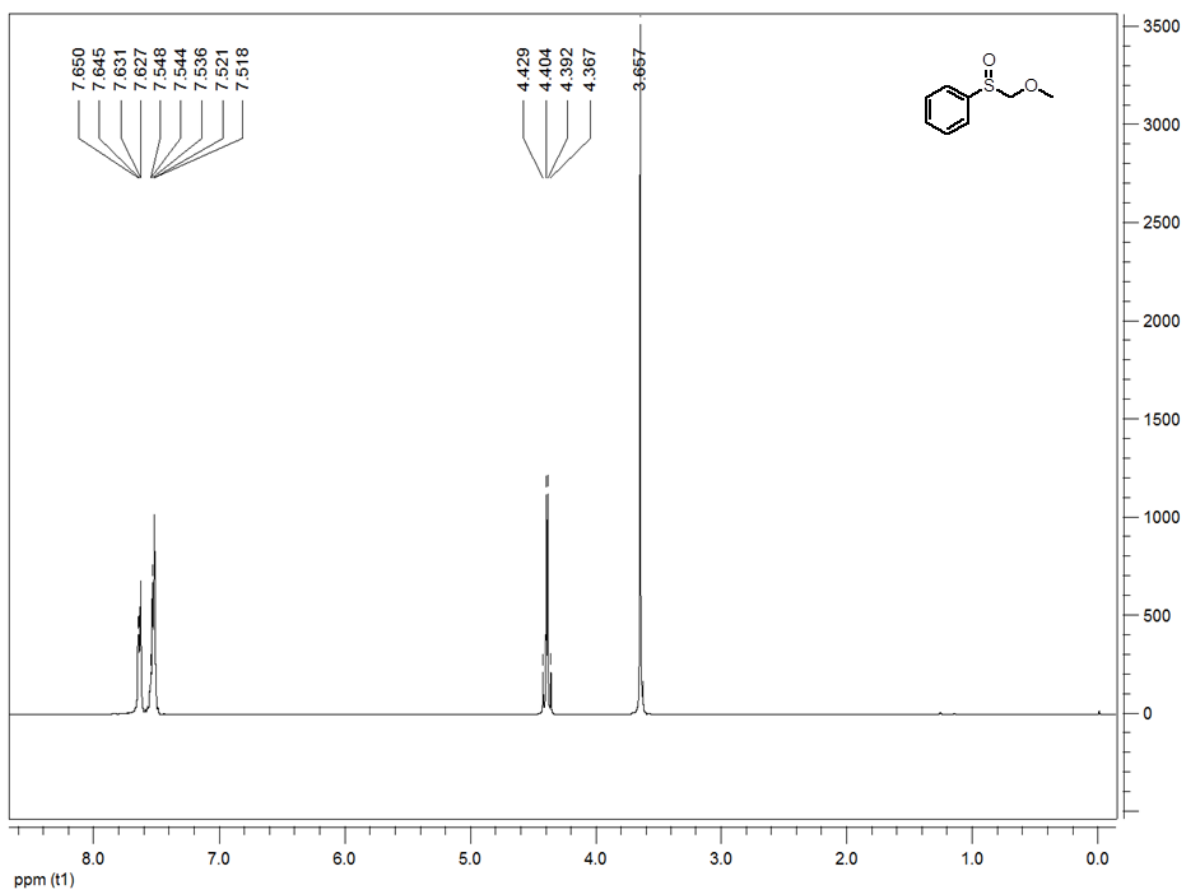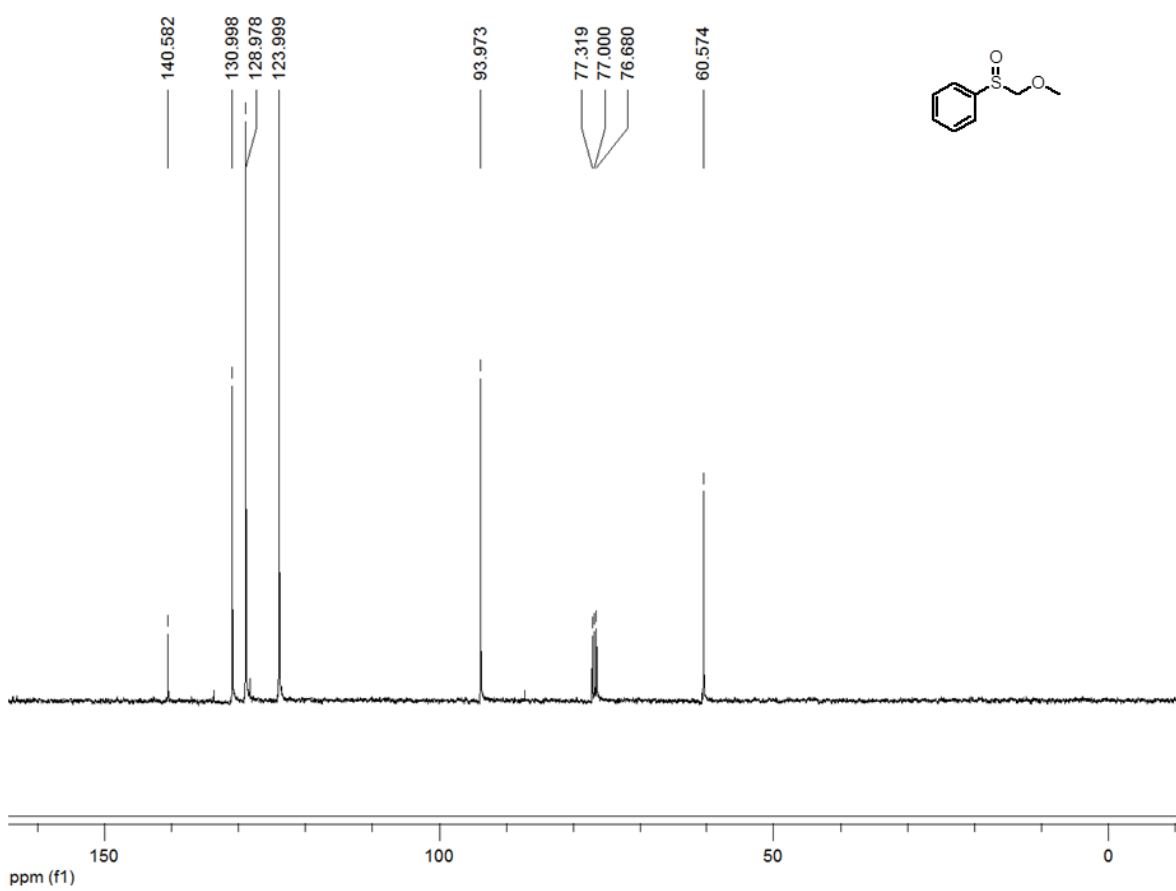

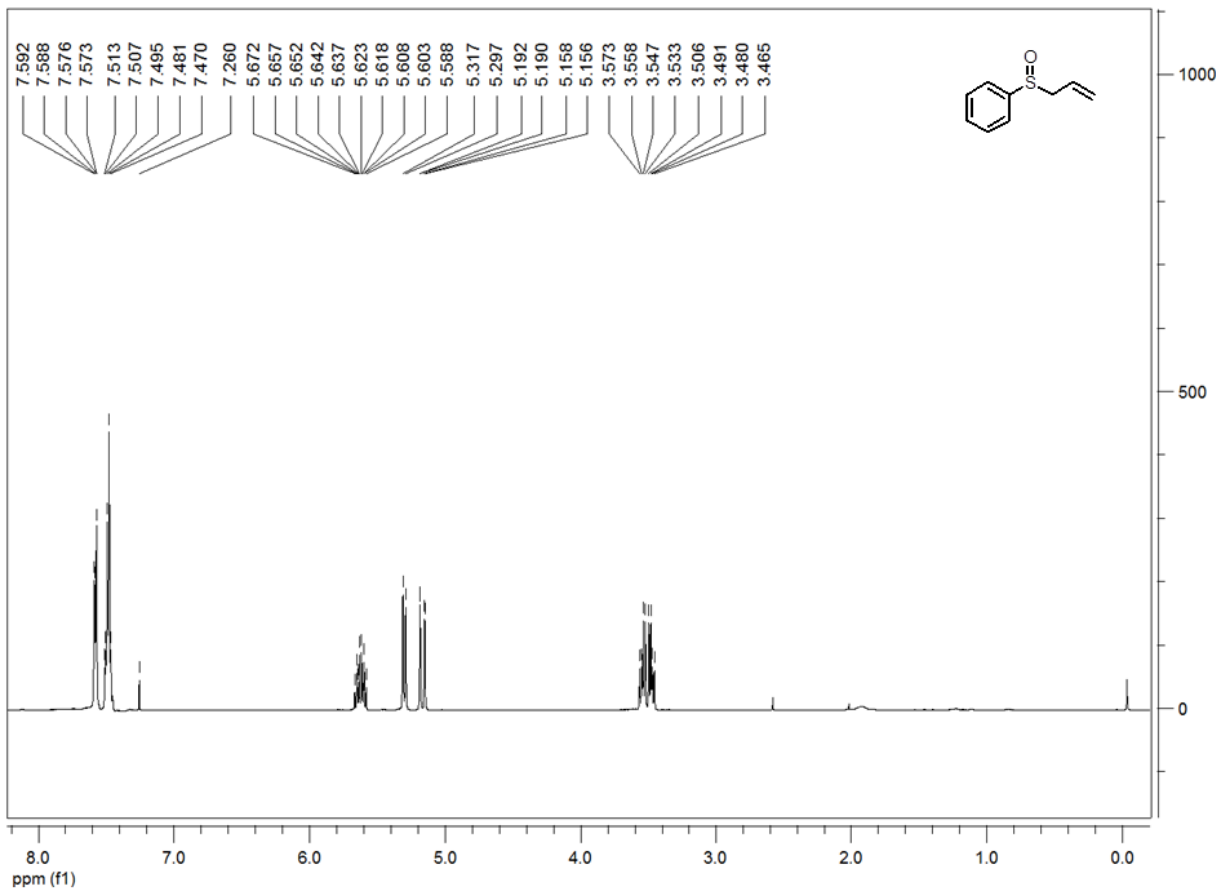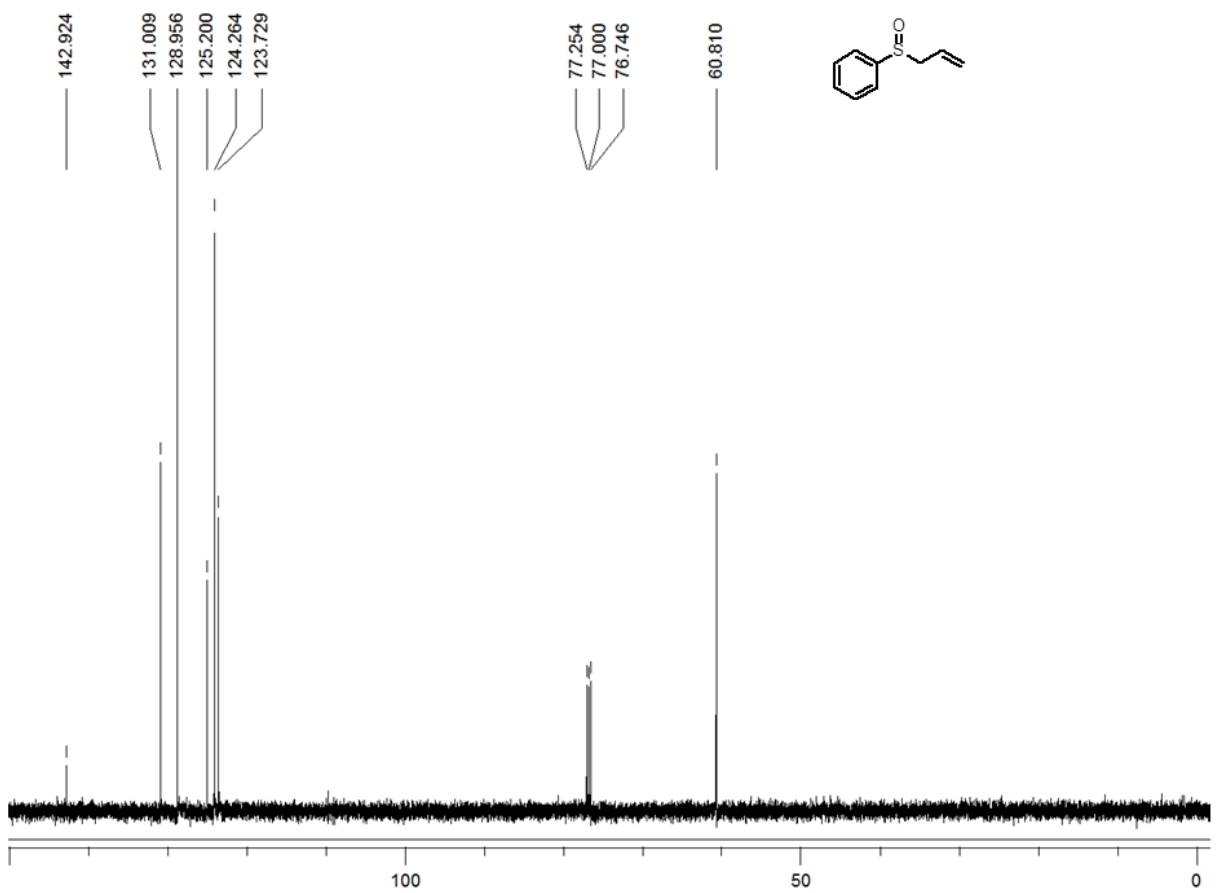

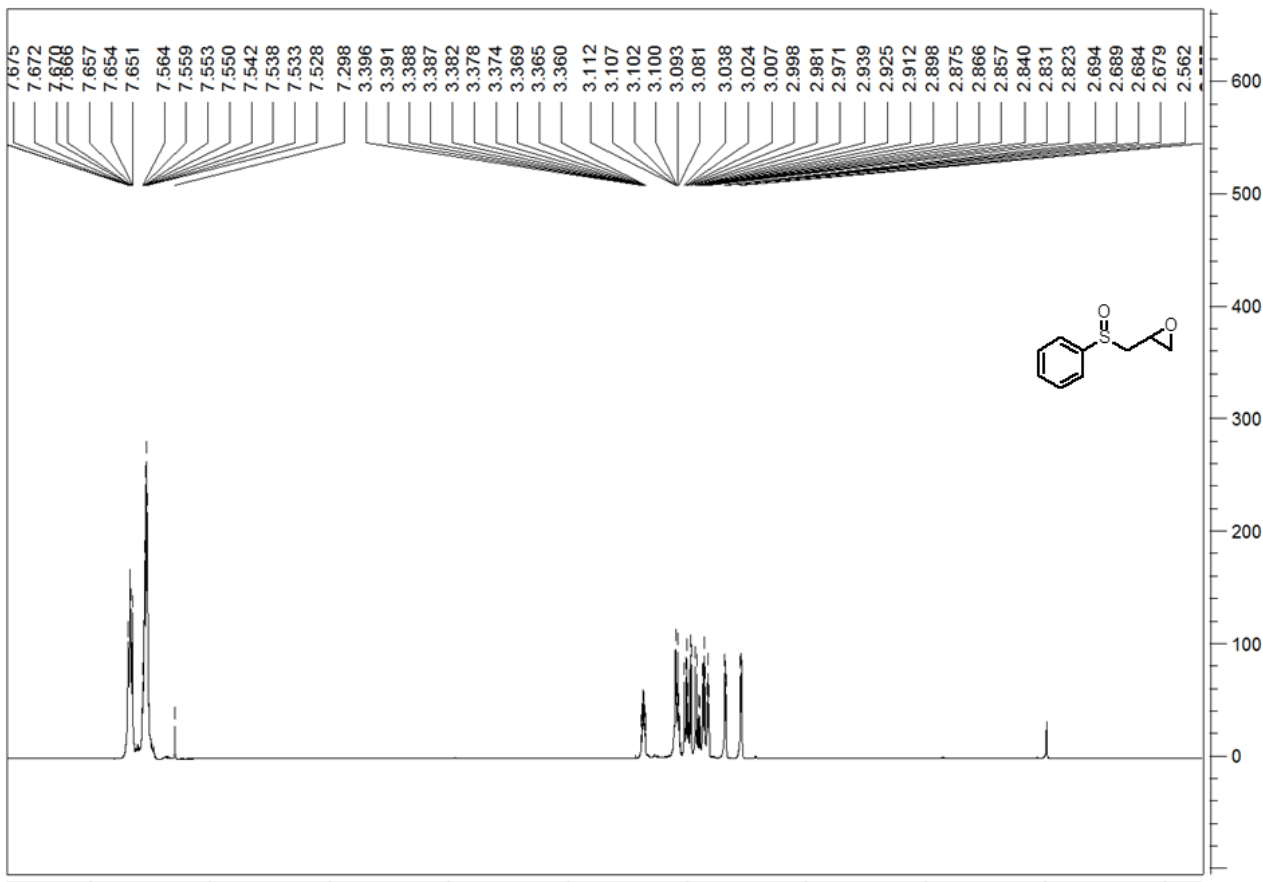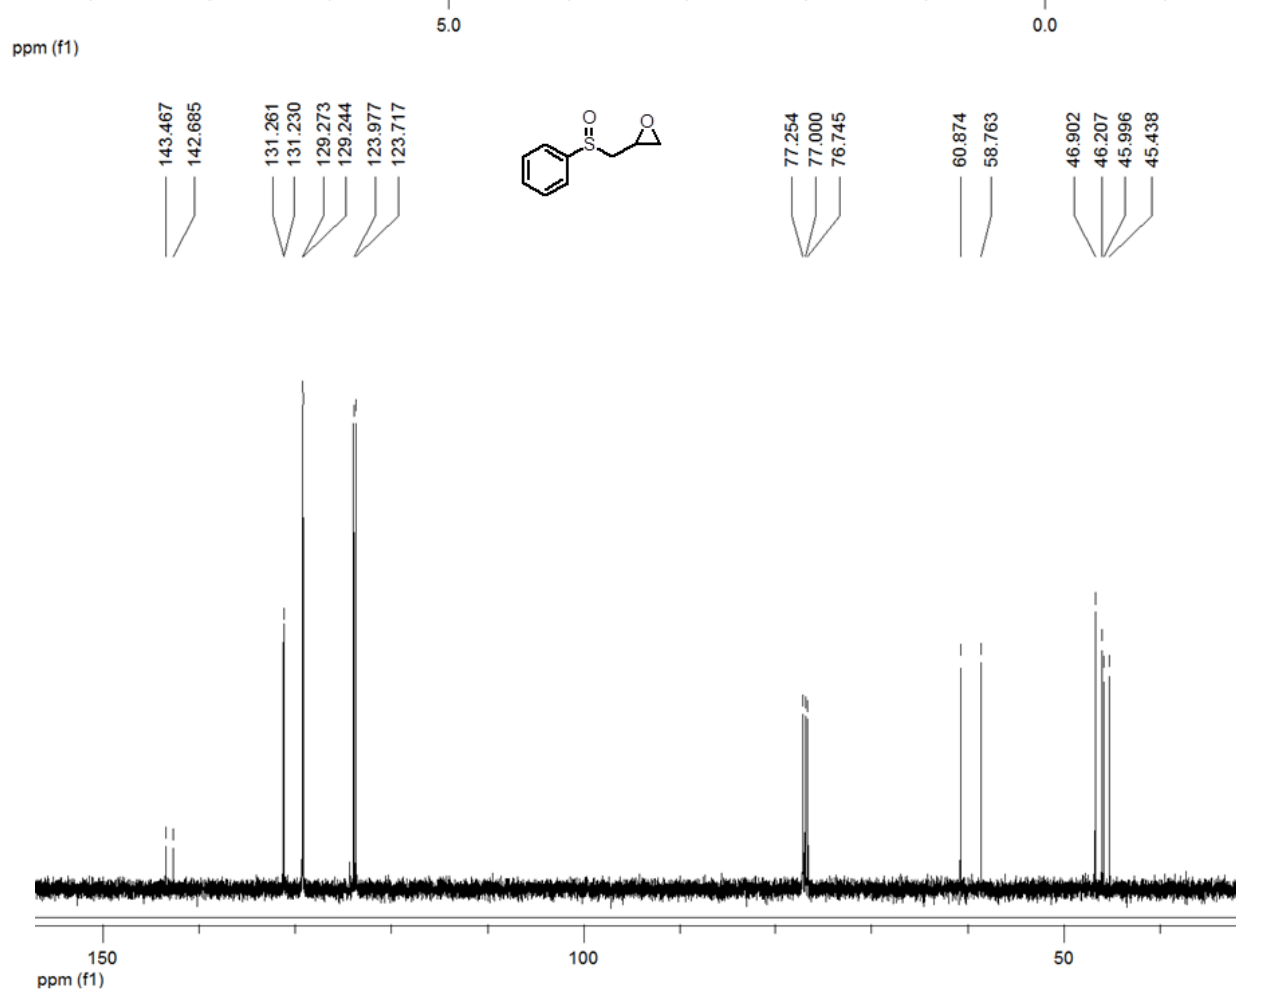

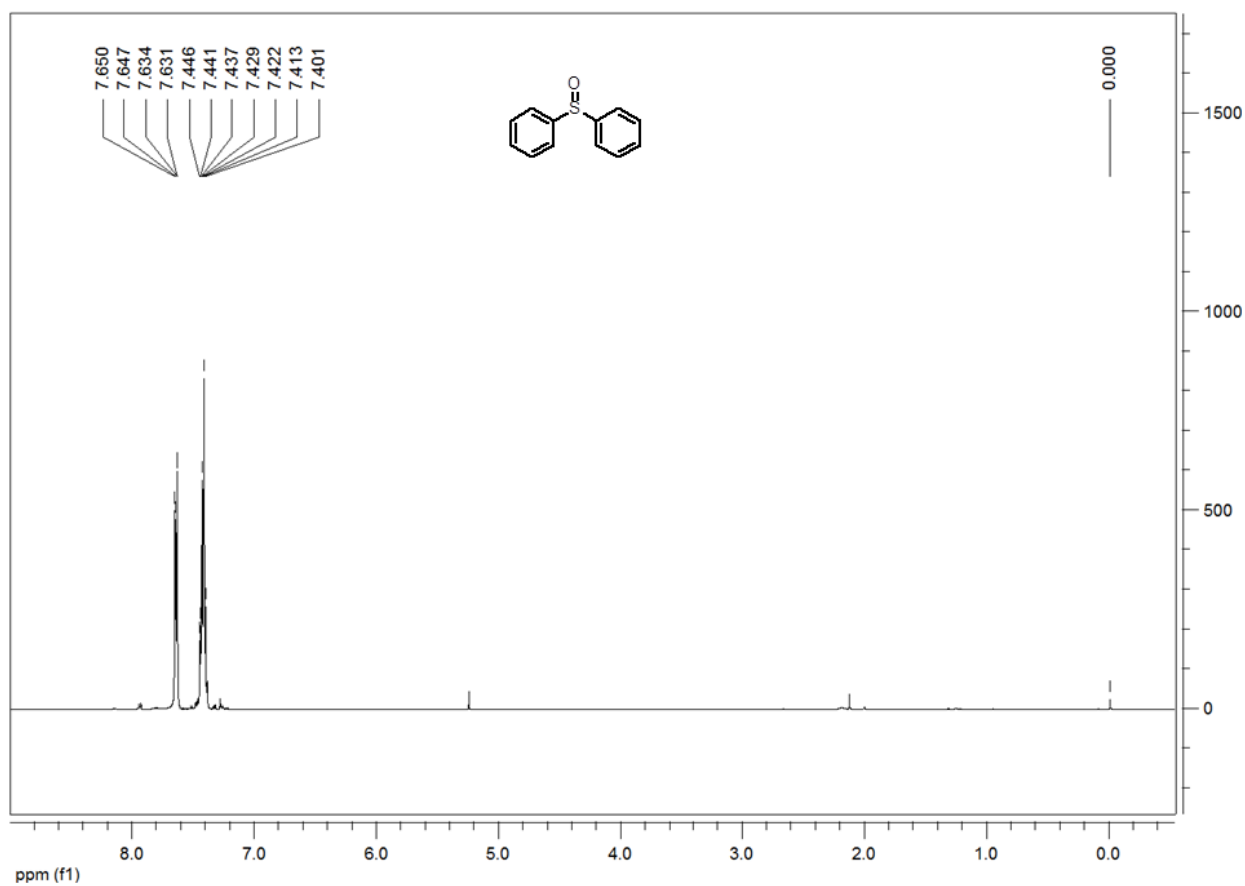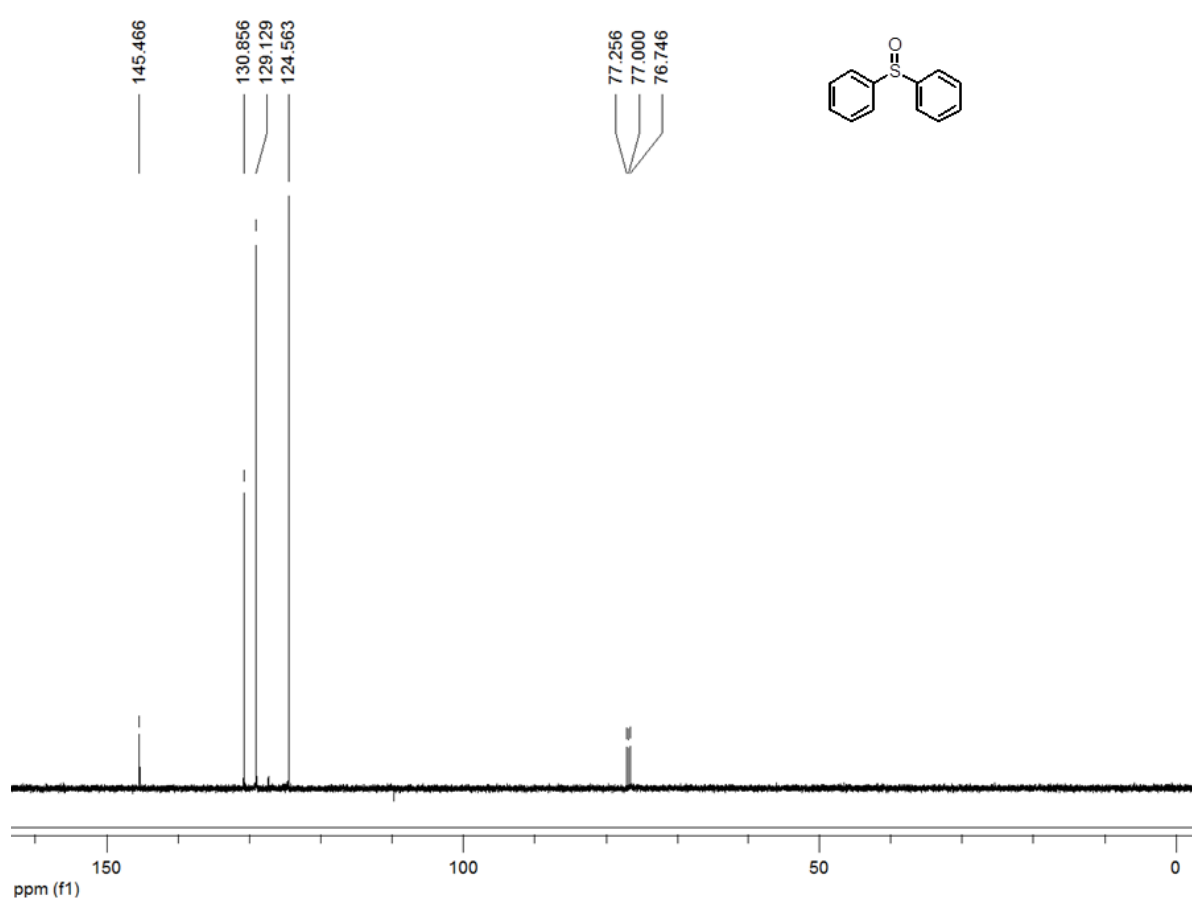

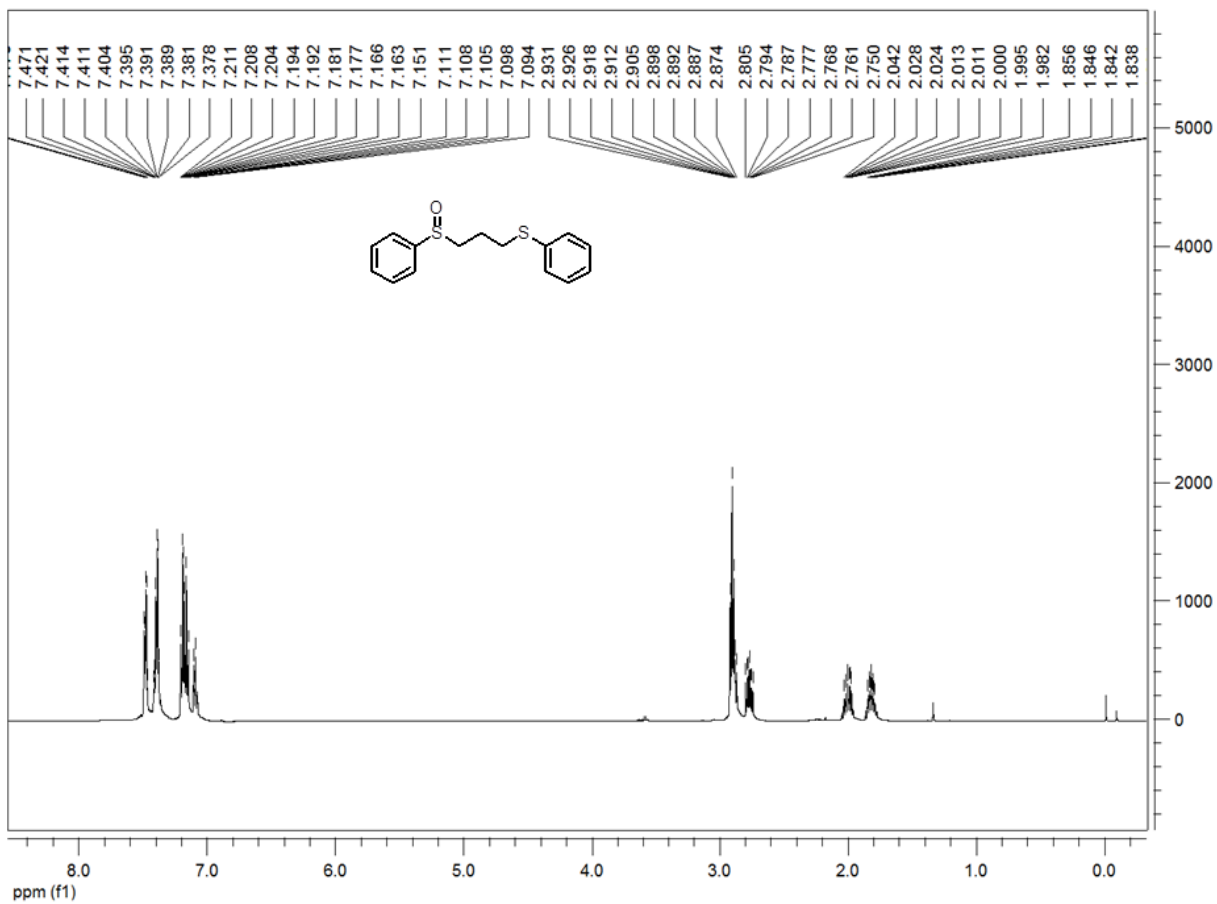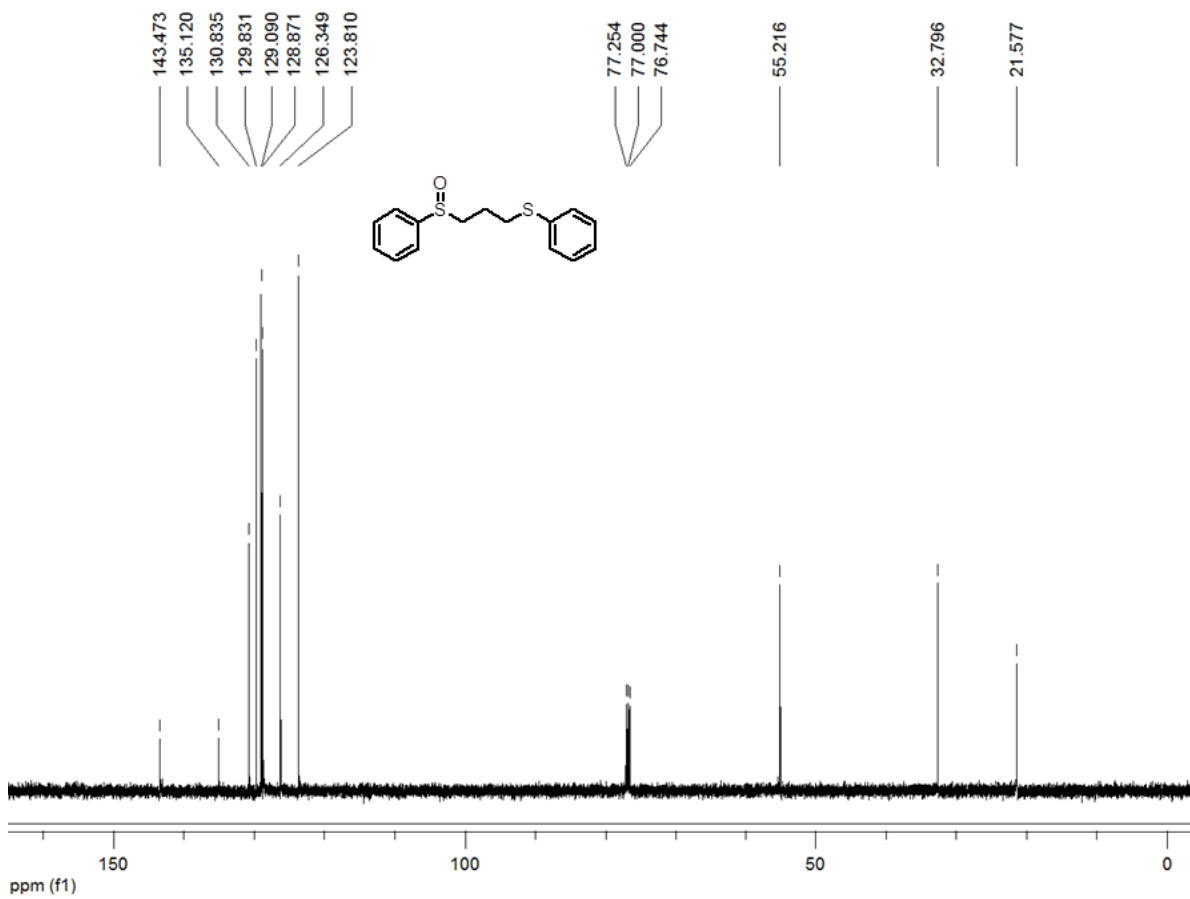

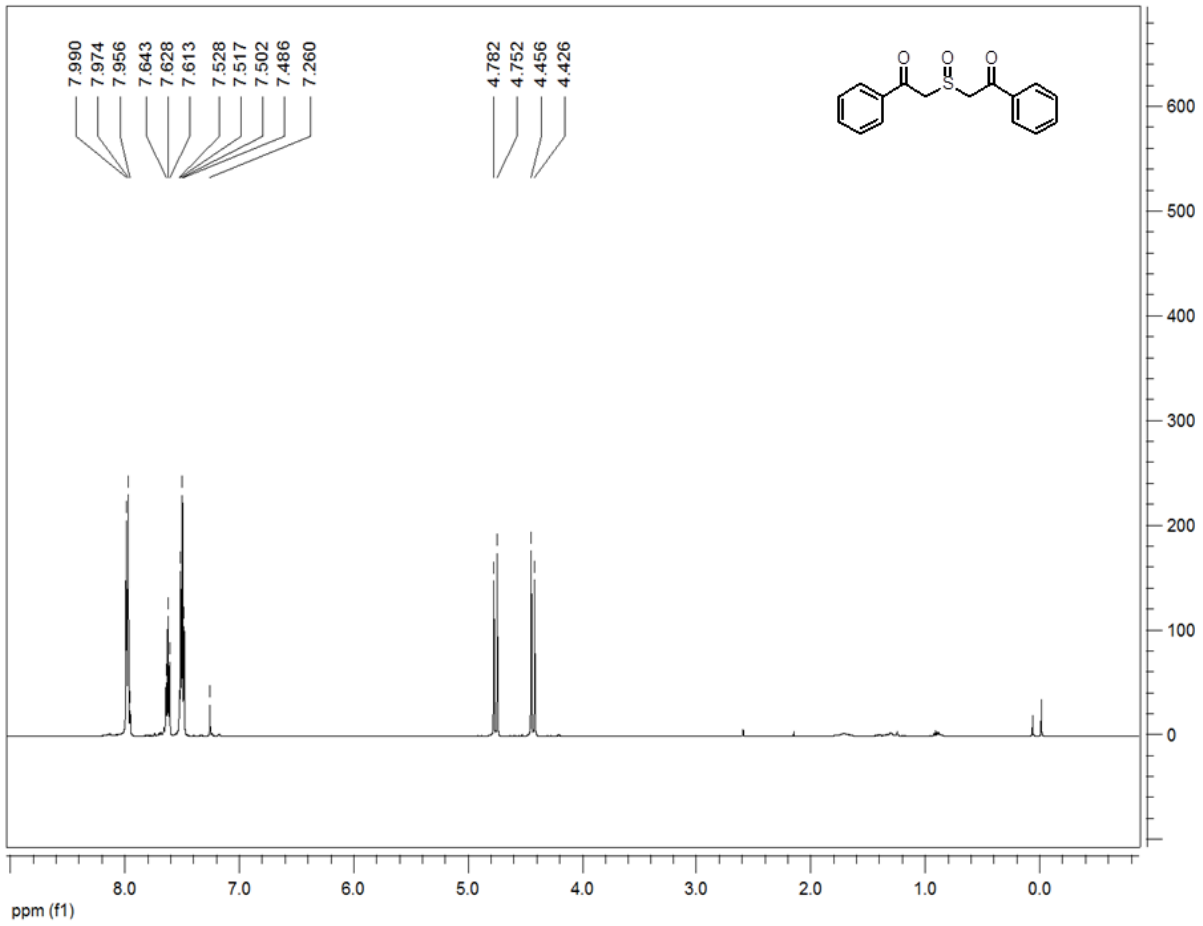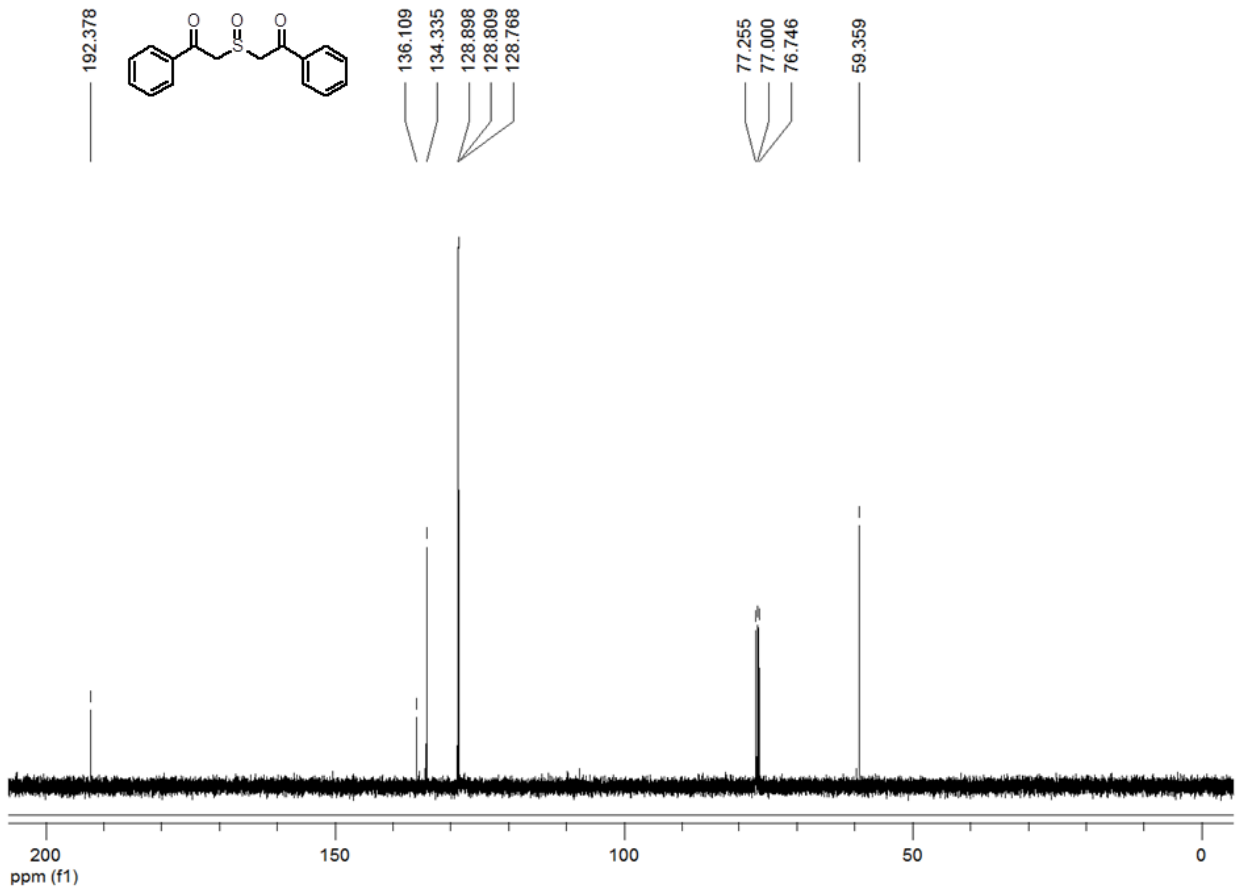



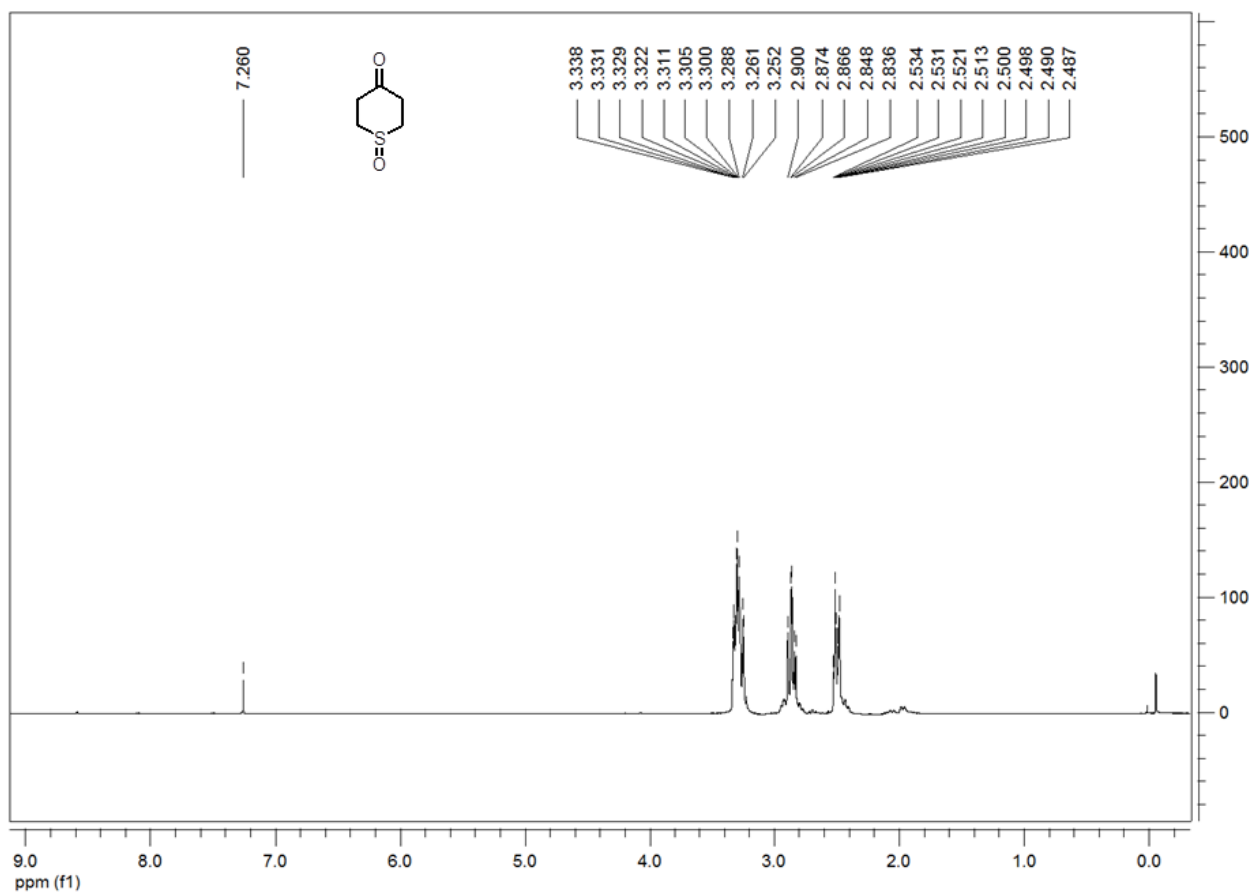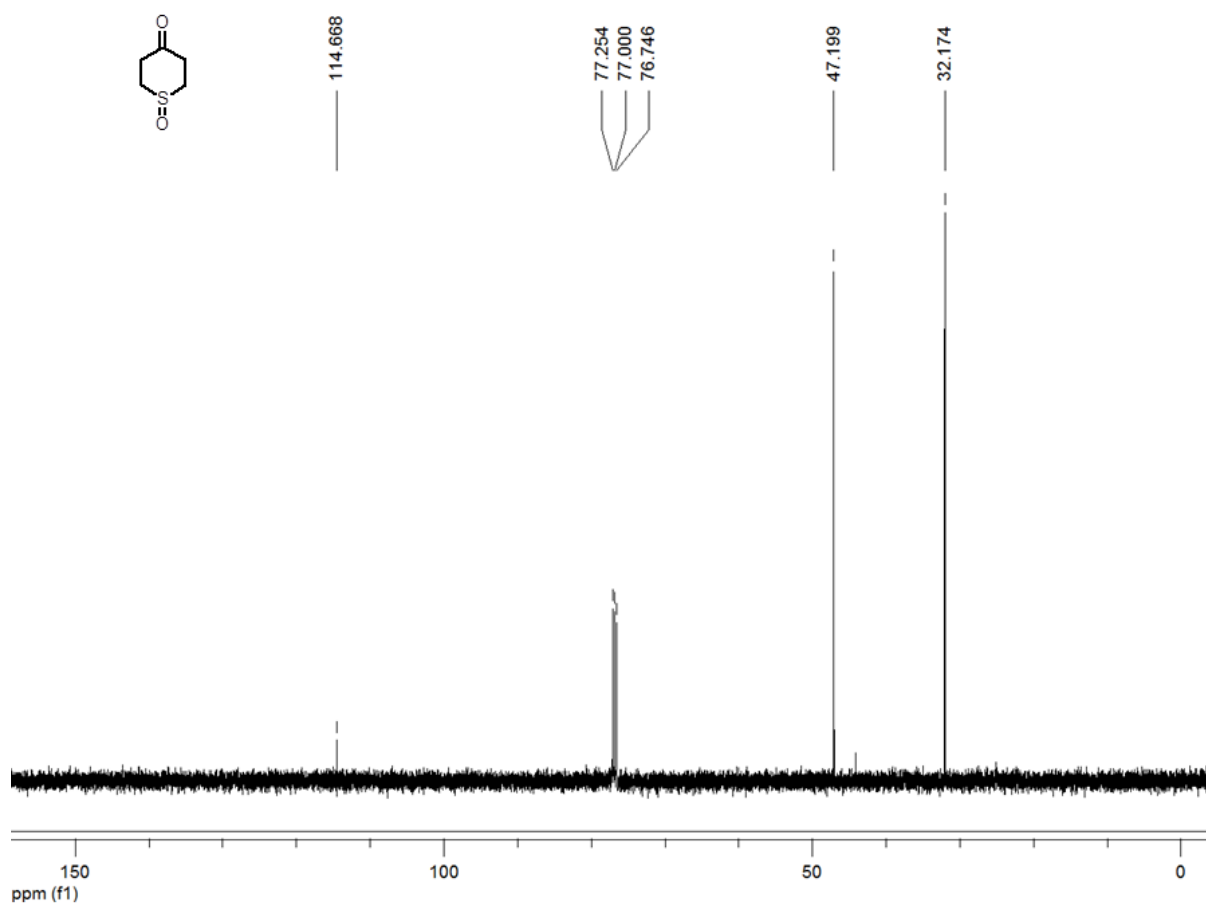

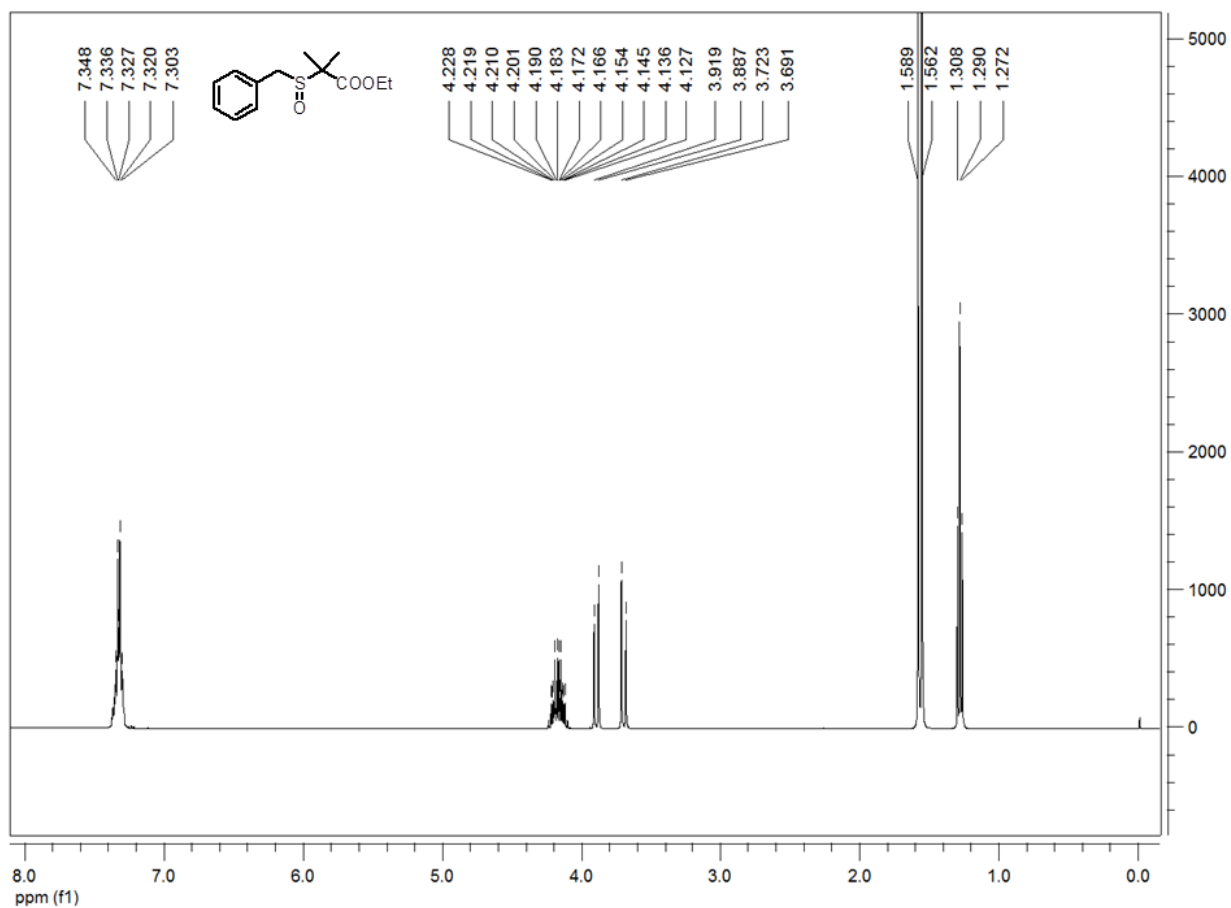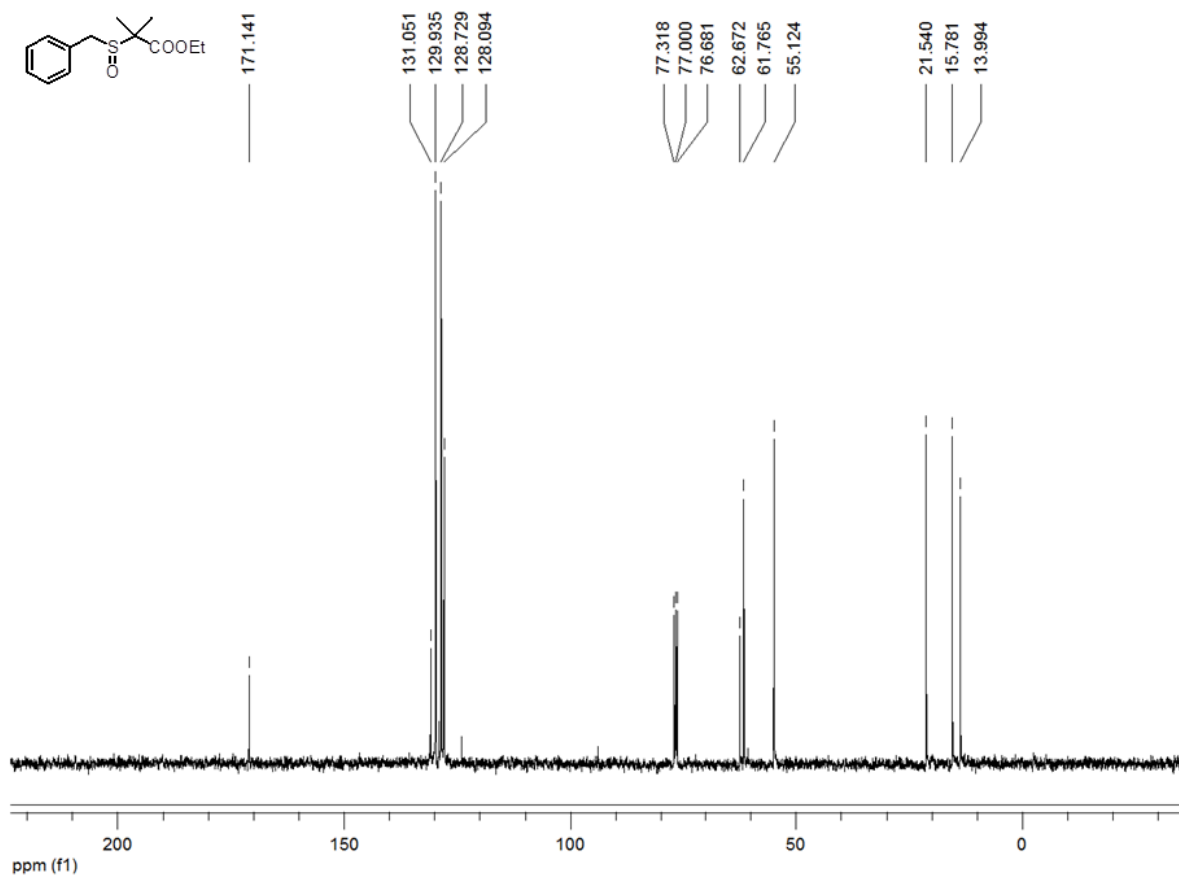

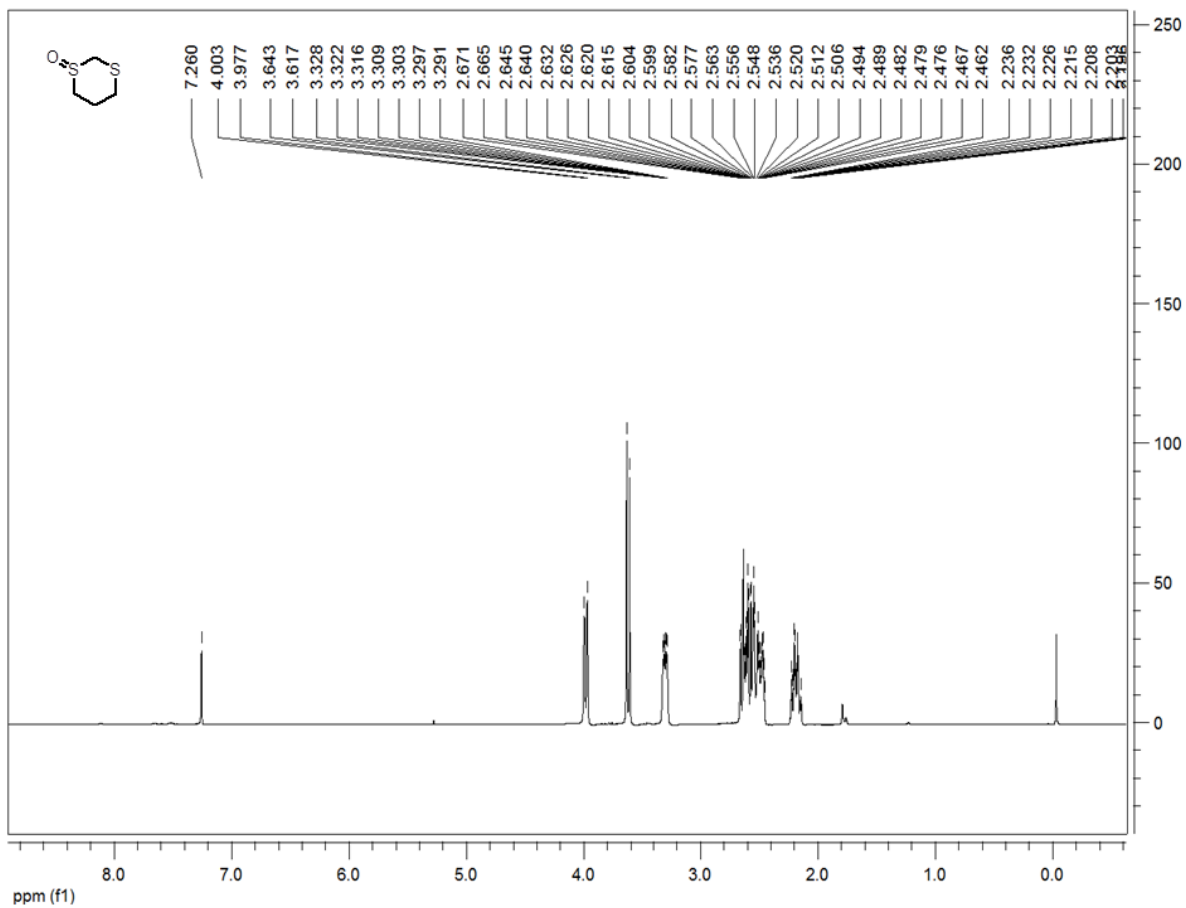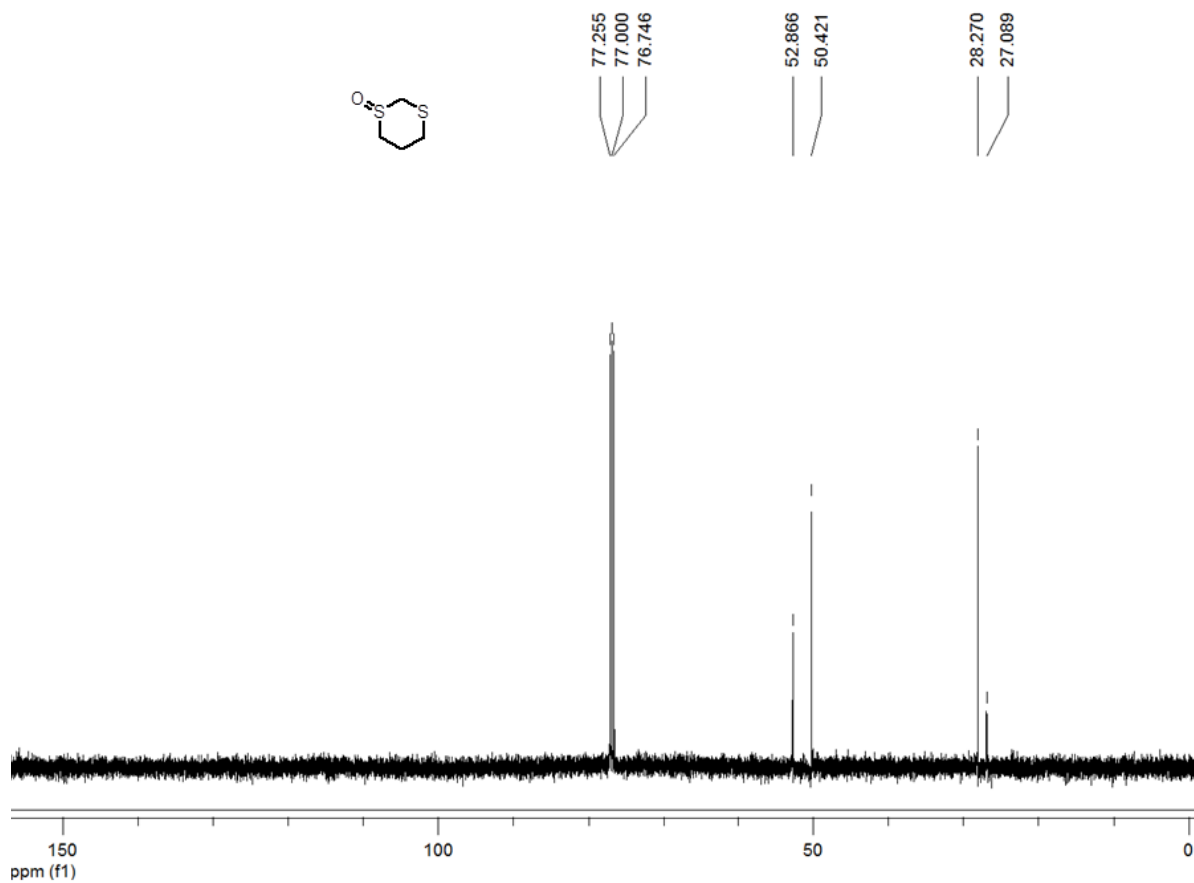

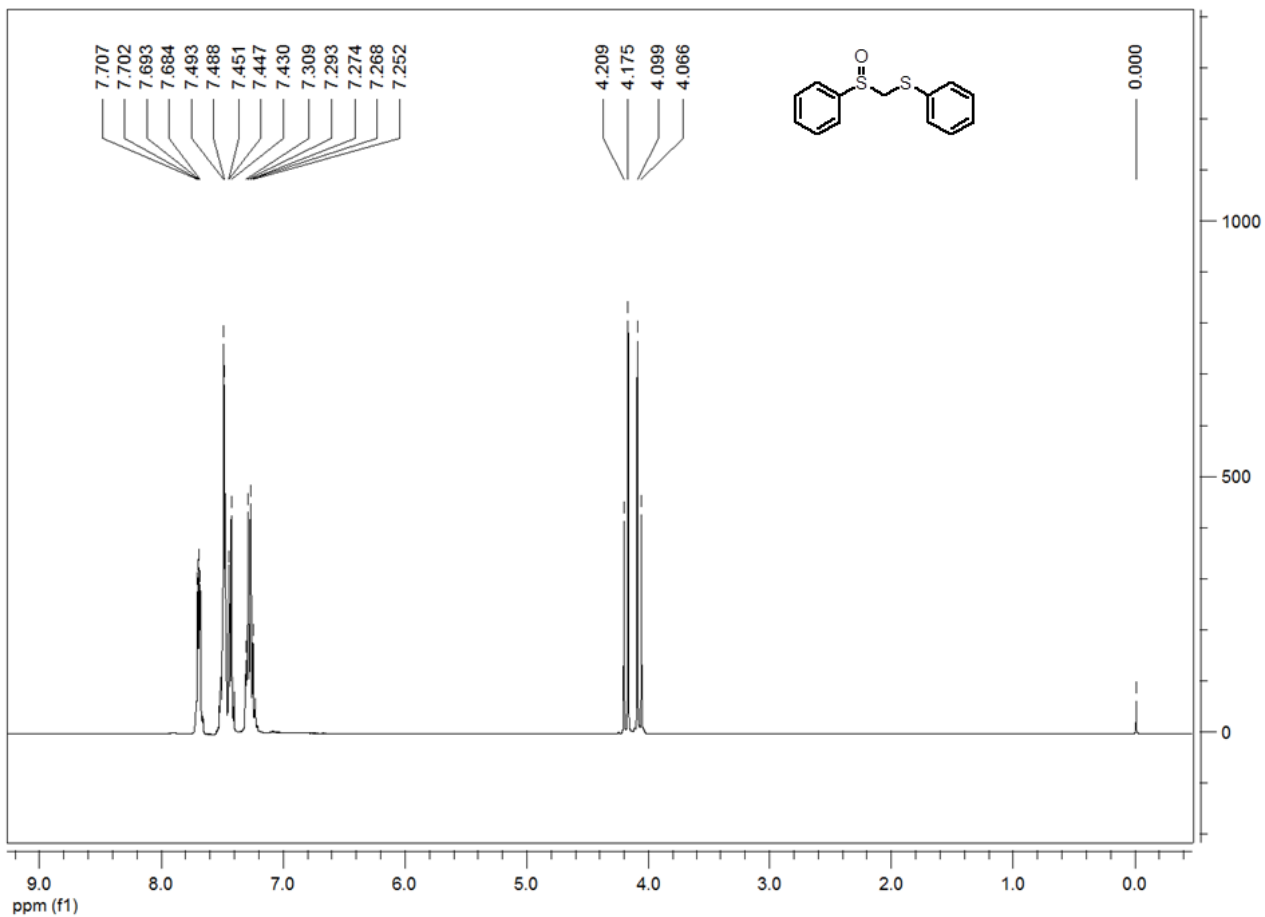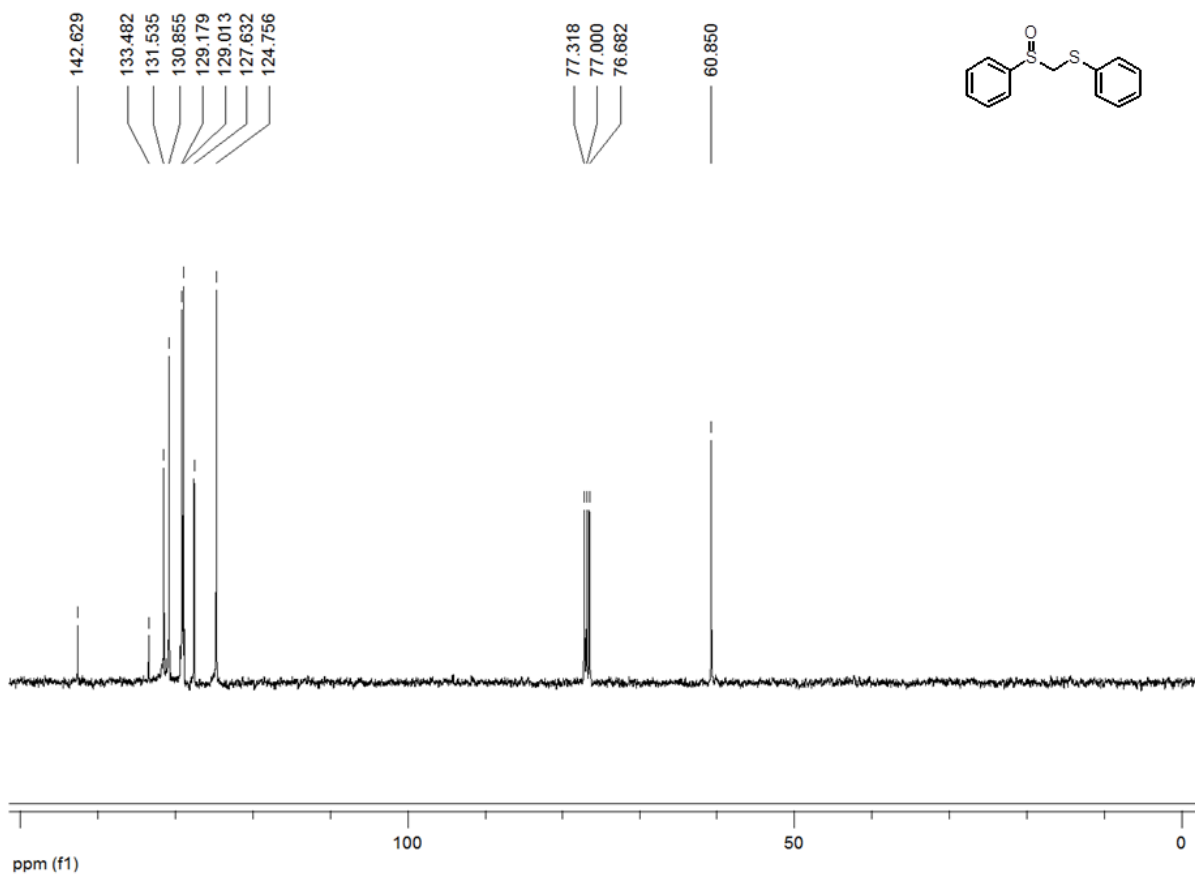

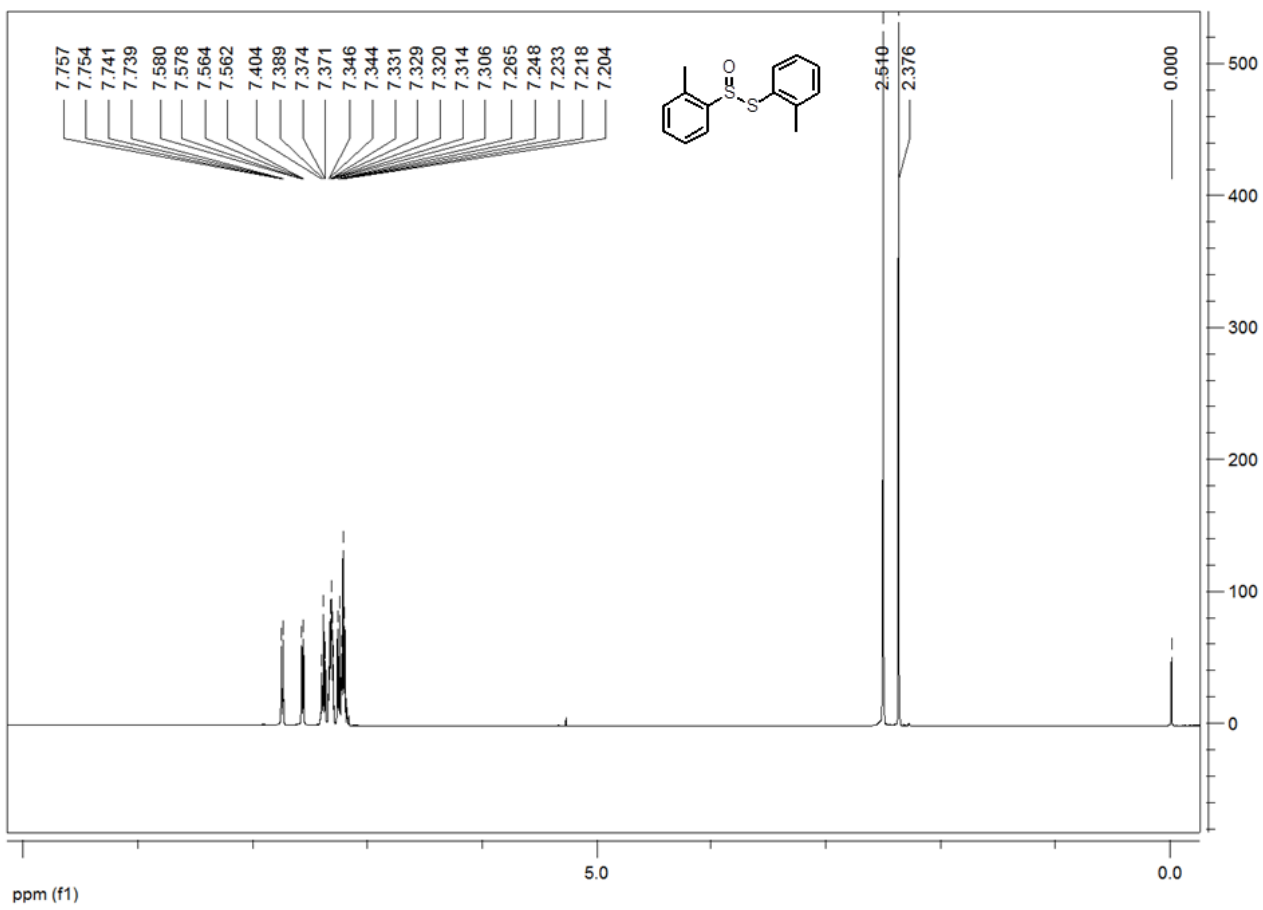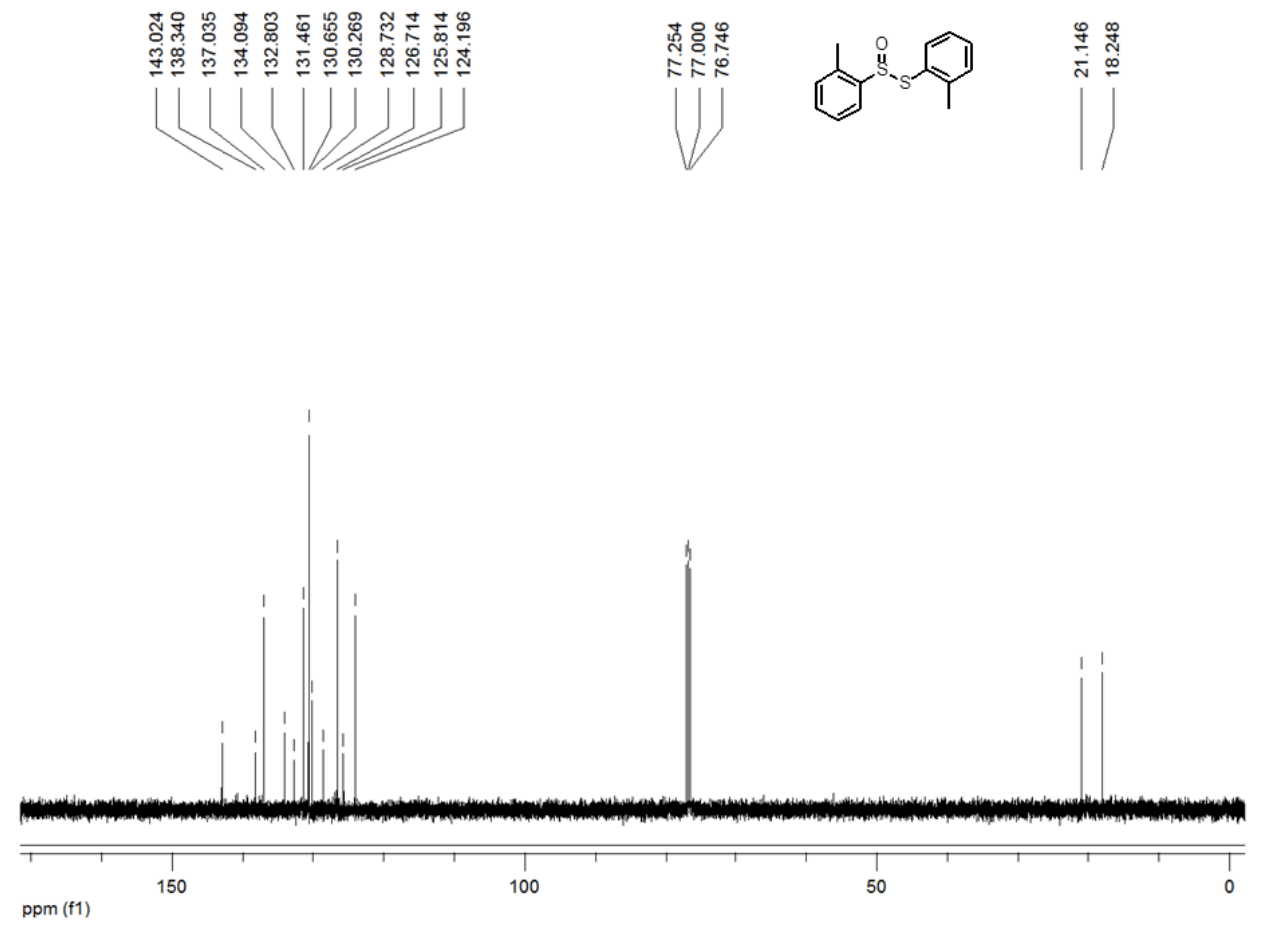

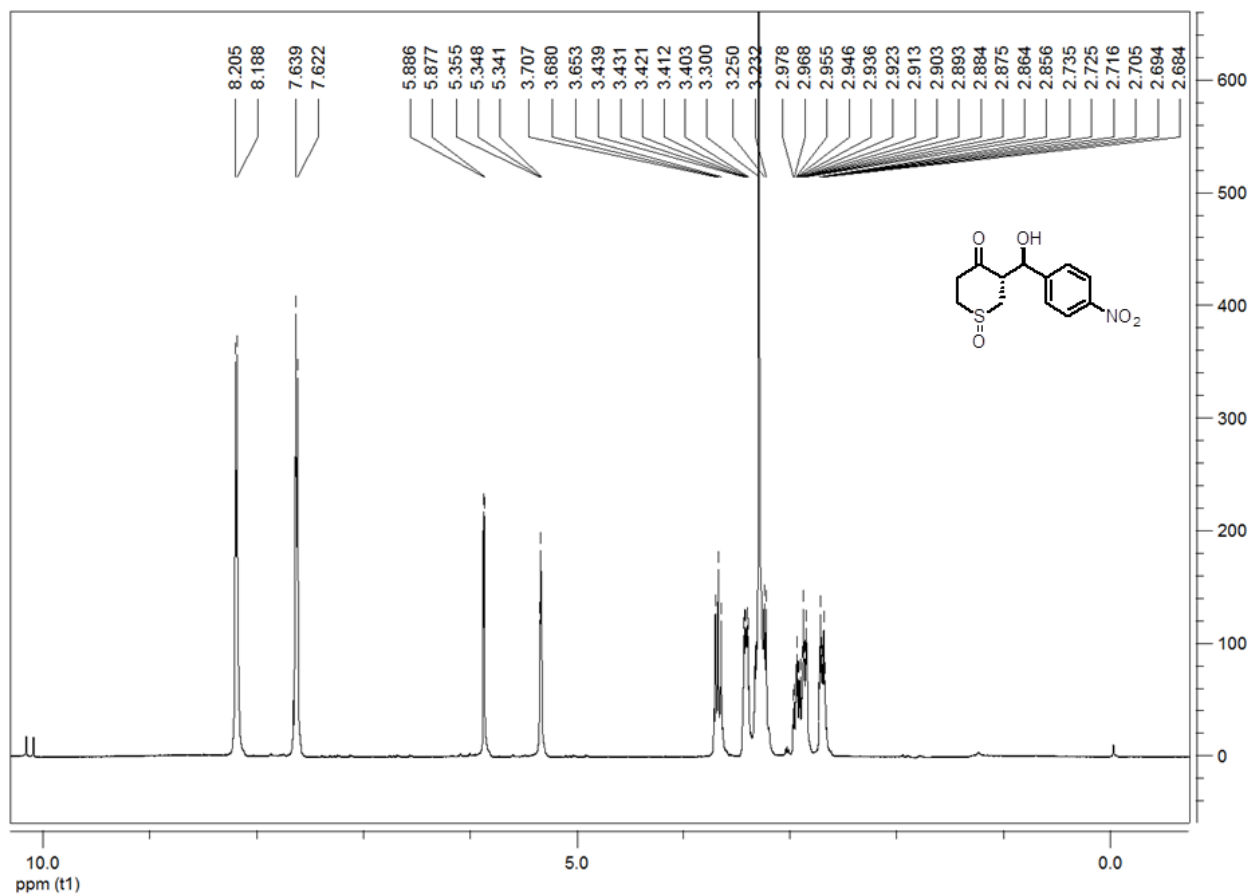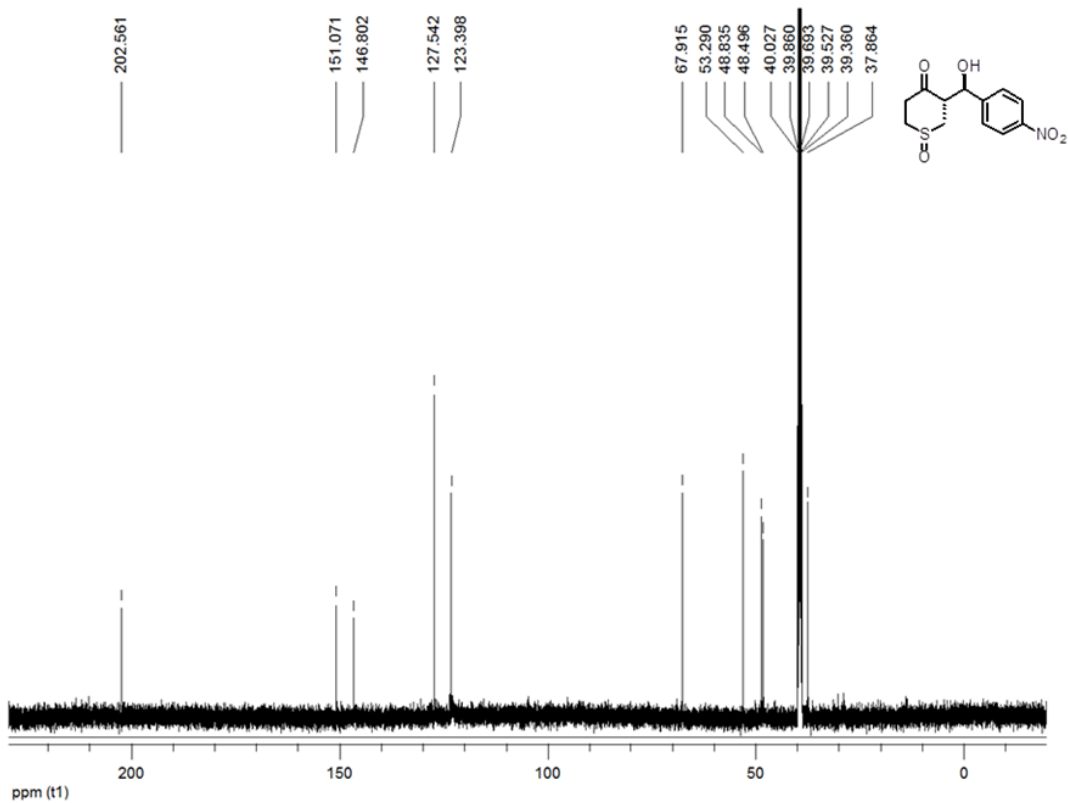

### 2.3. <sup>1</sup>H NMR spectra and titration of compound 2a with TBHP

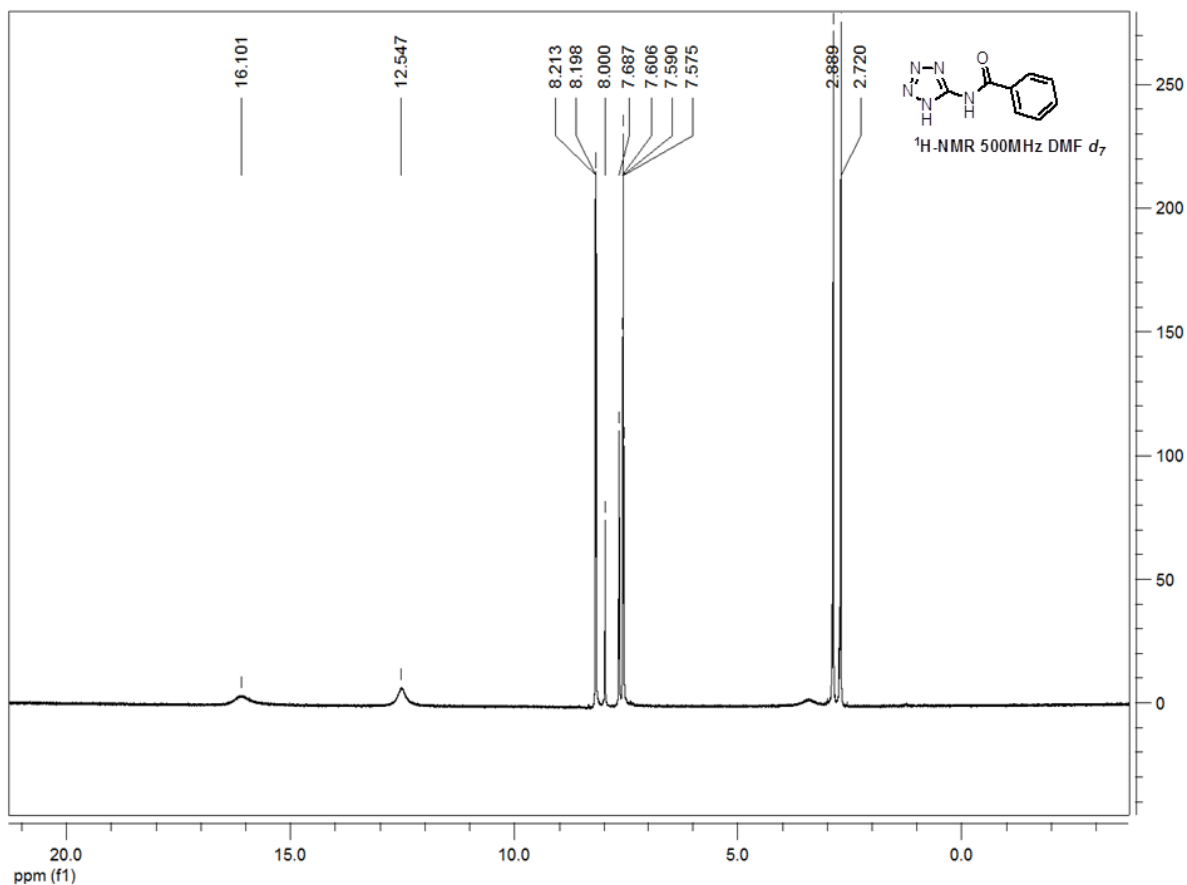

### <sup>1</sup>H NMR spectra and titration of compound 2b with TBHP

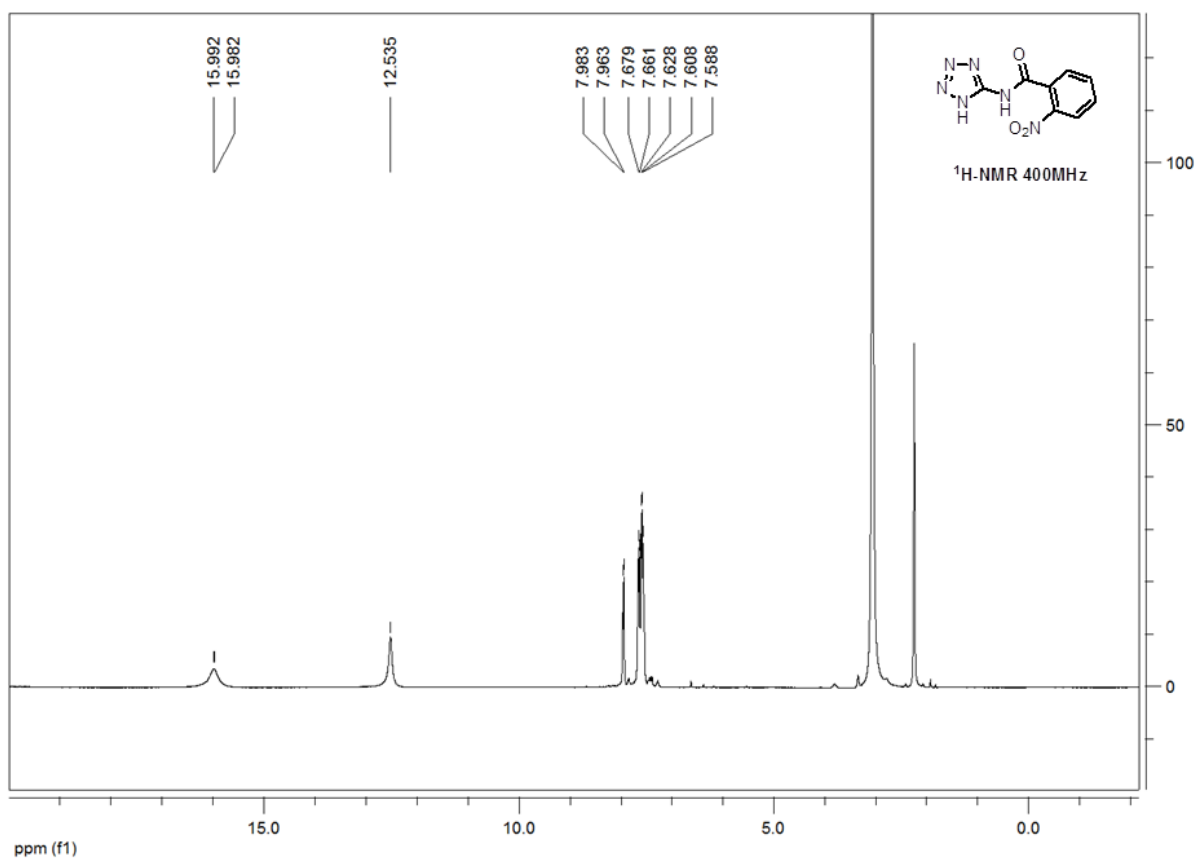

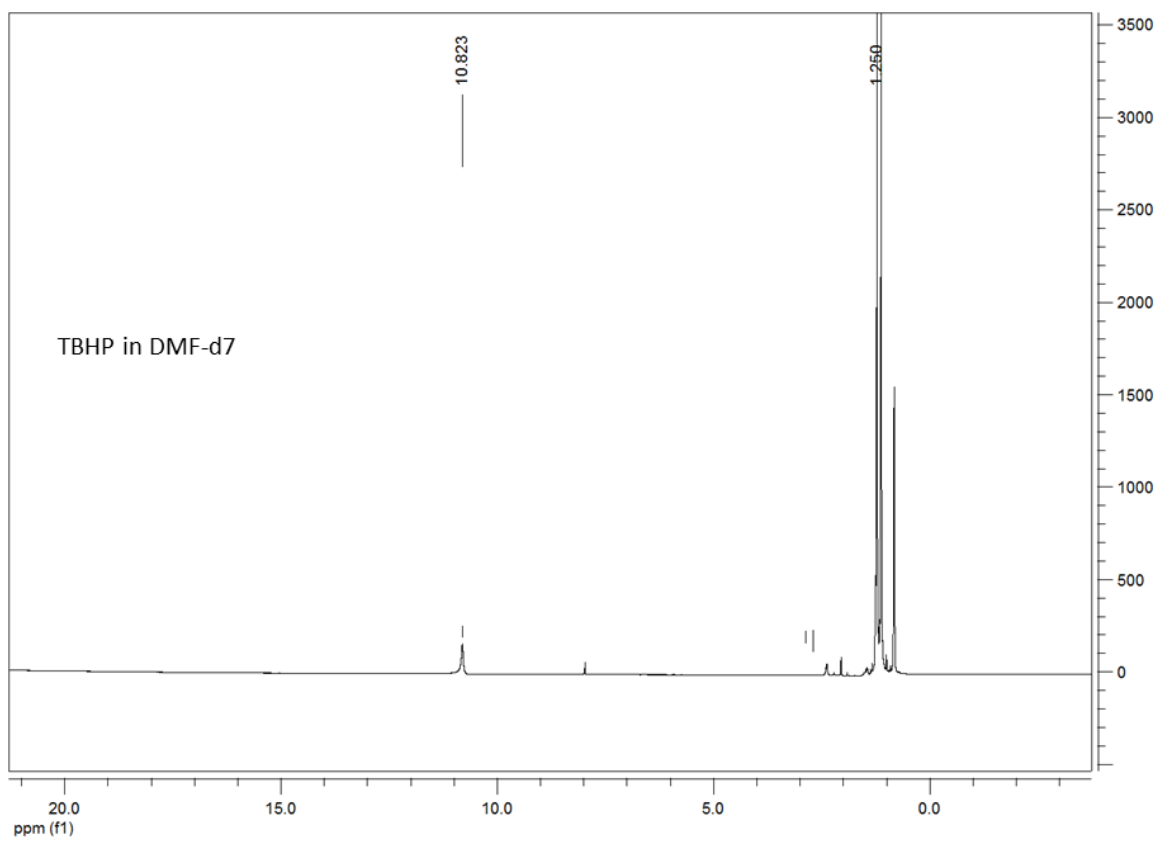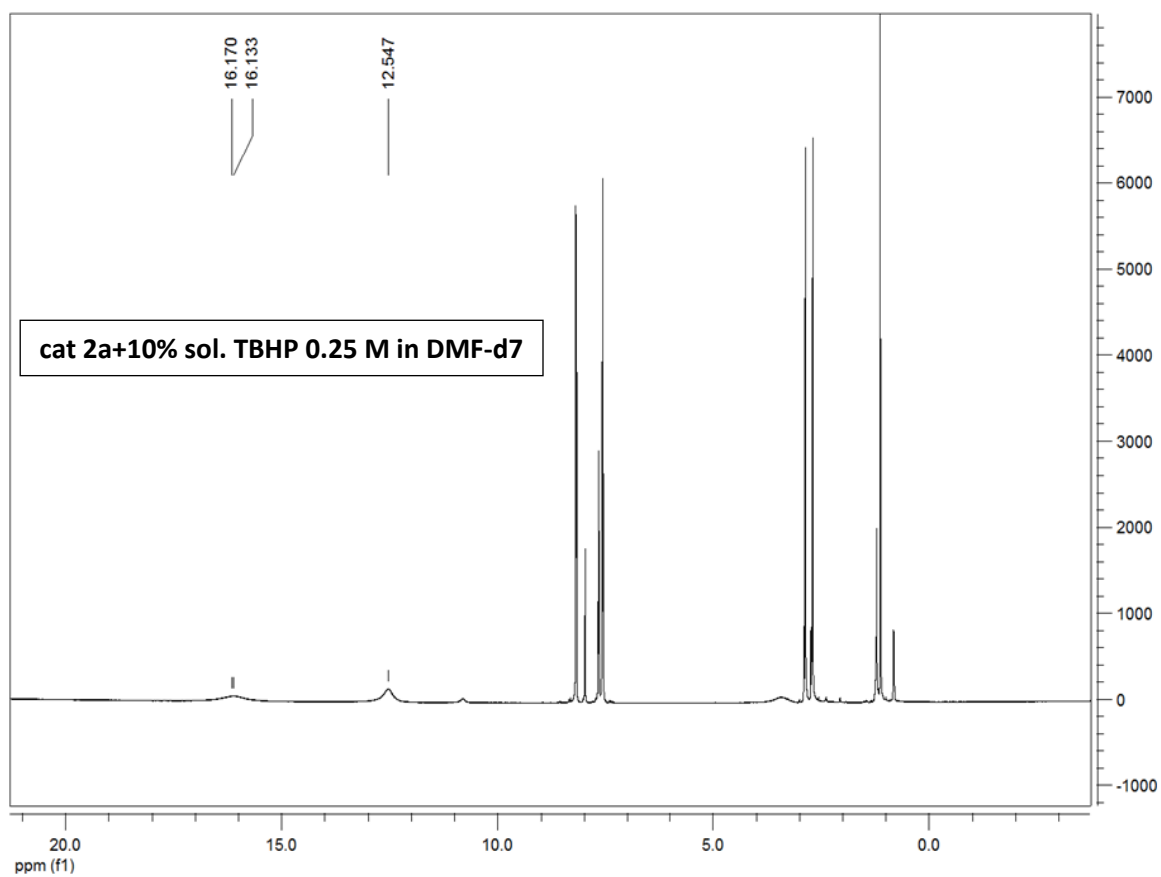



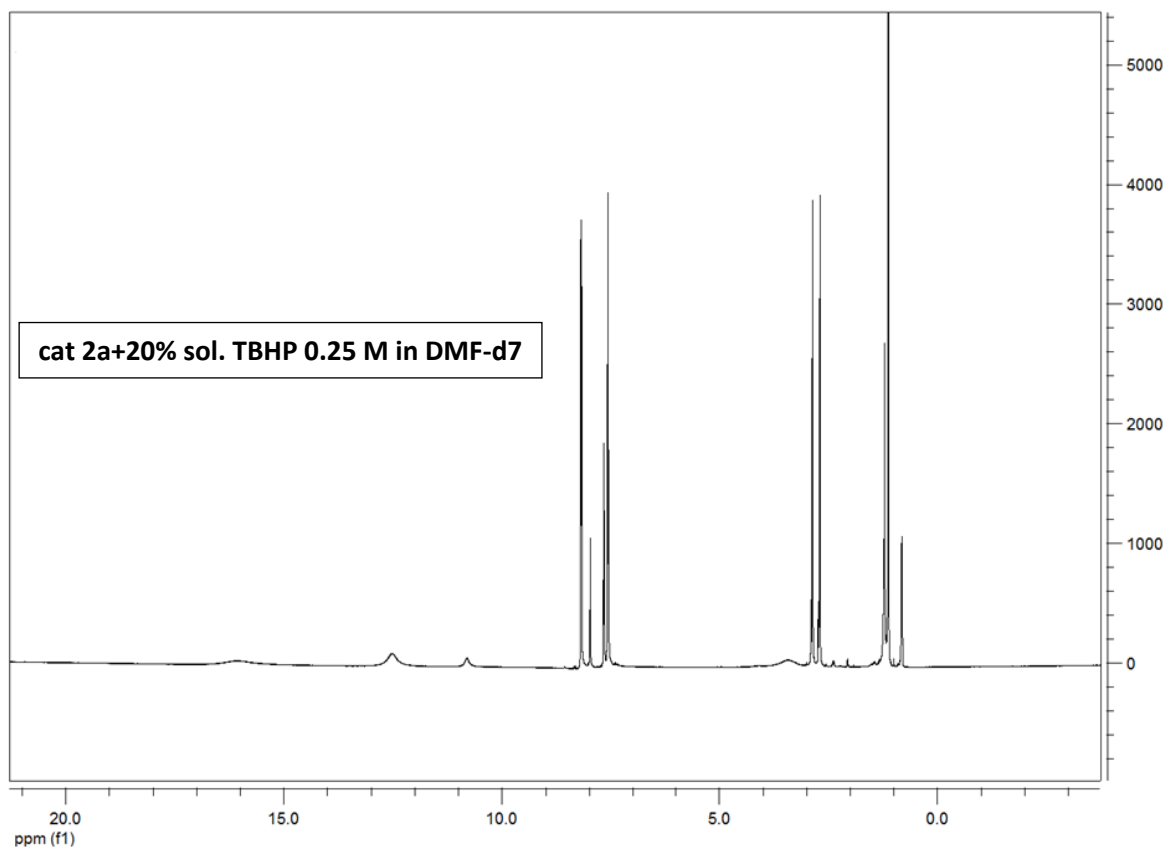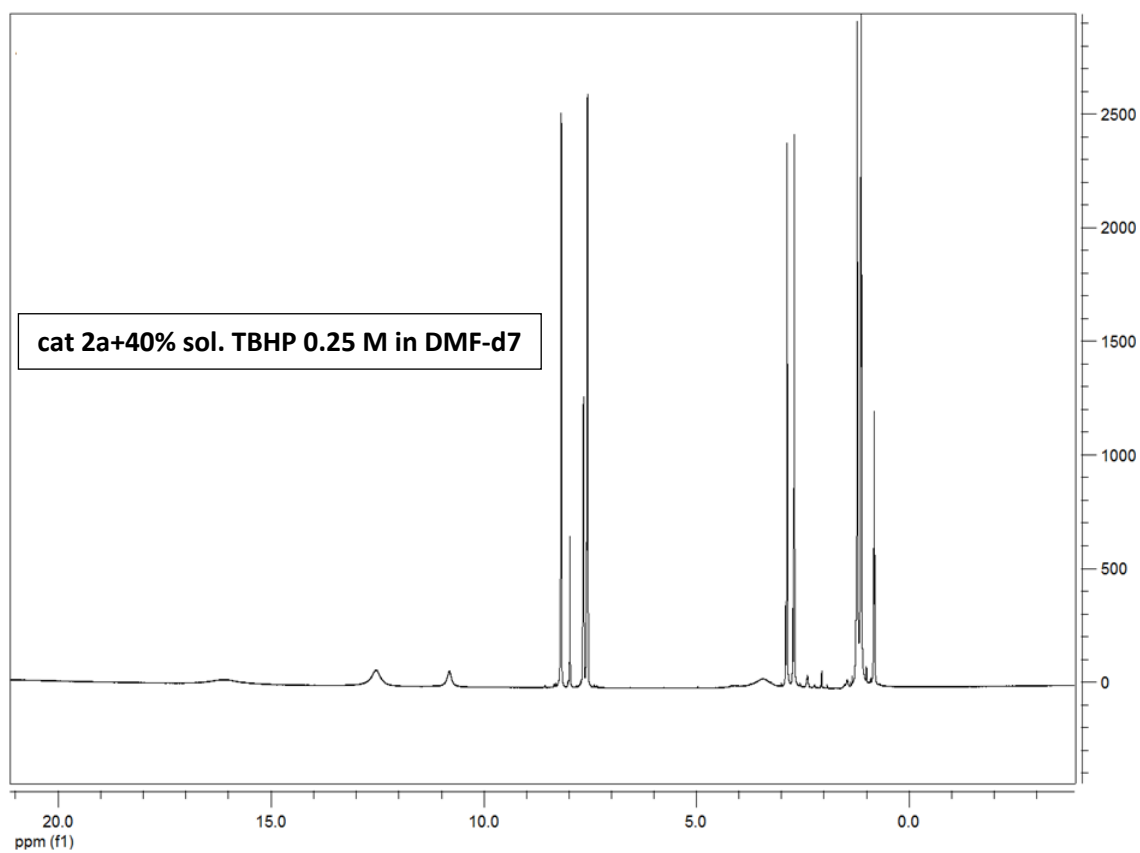

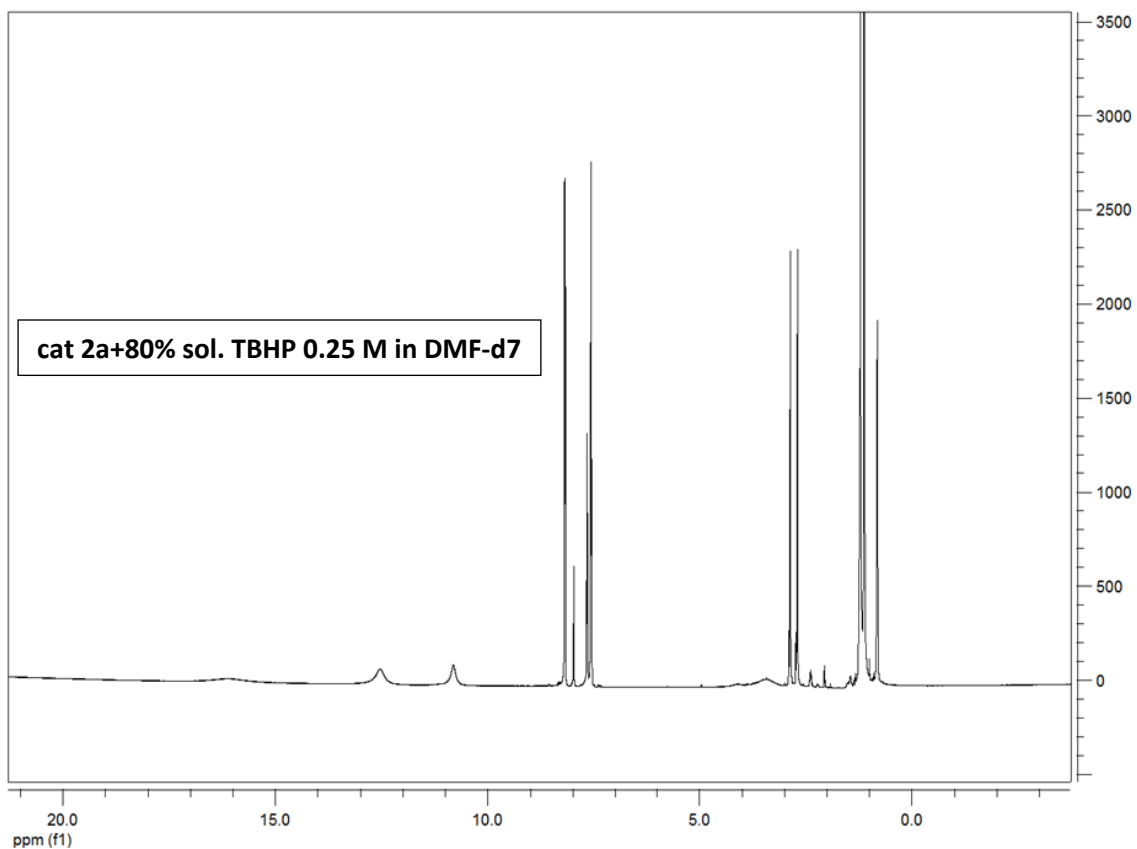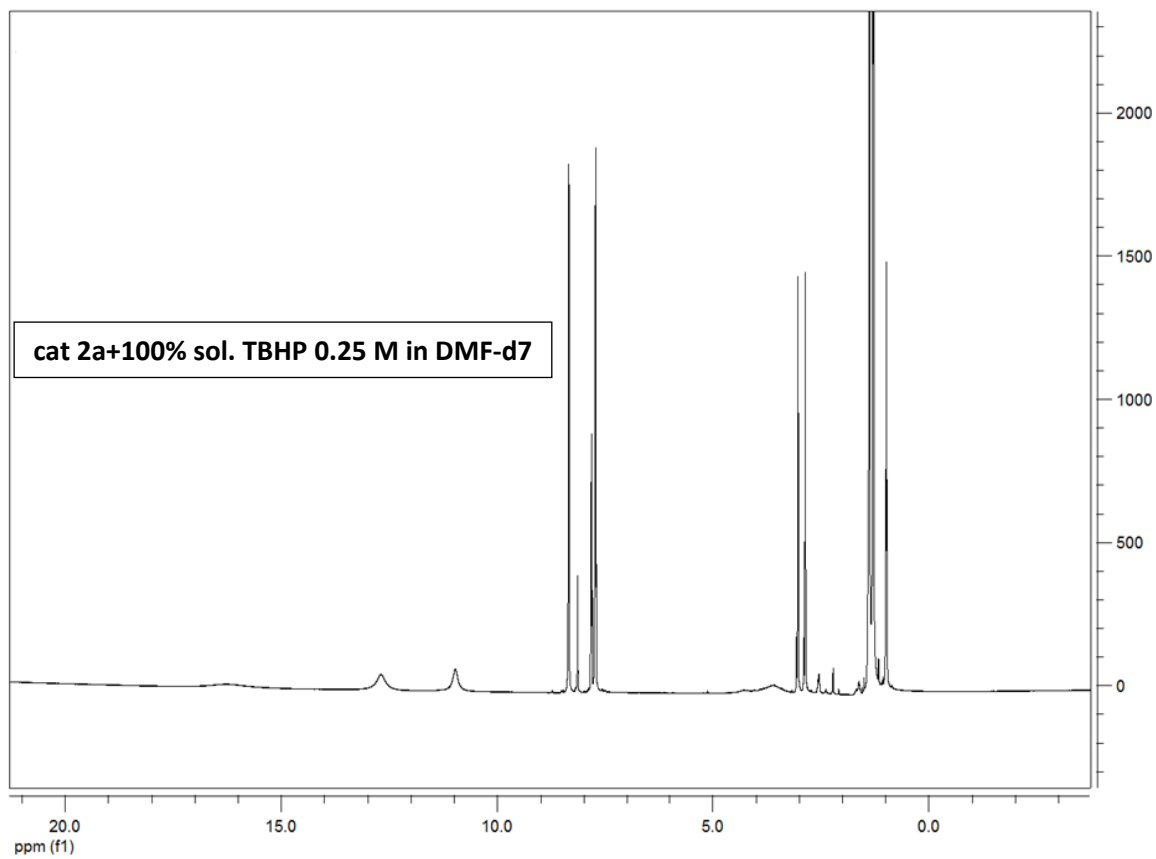

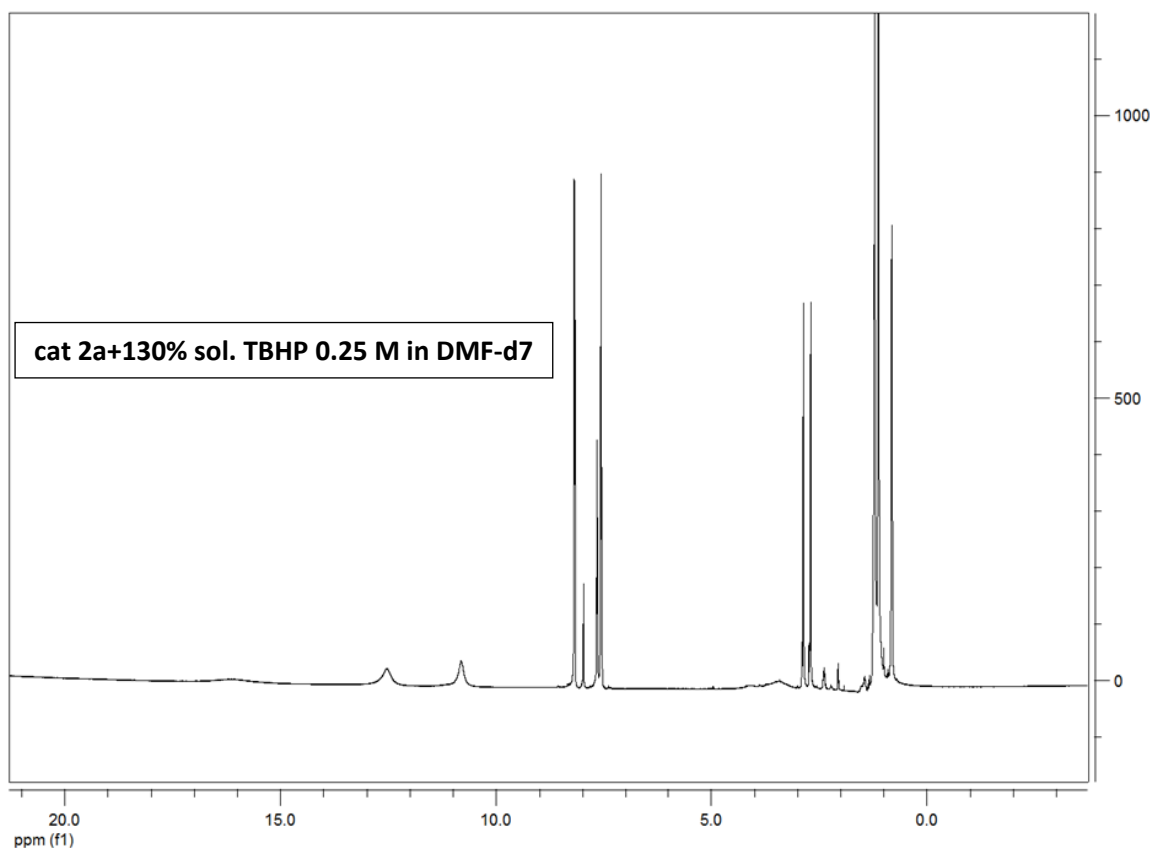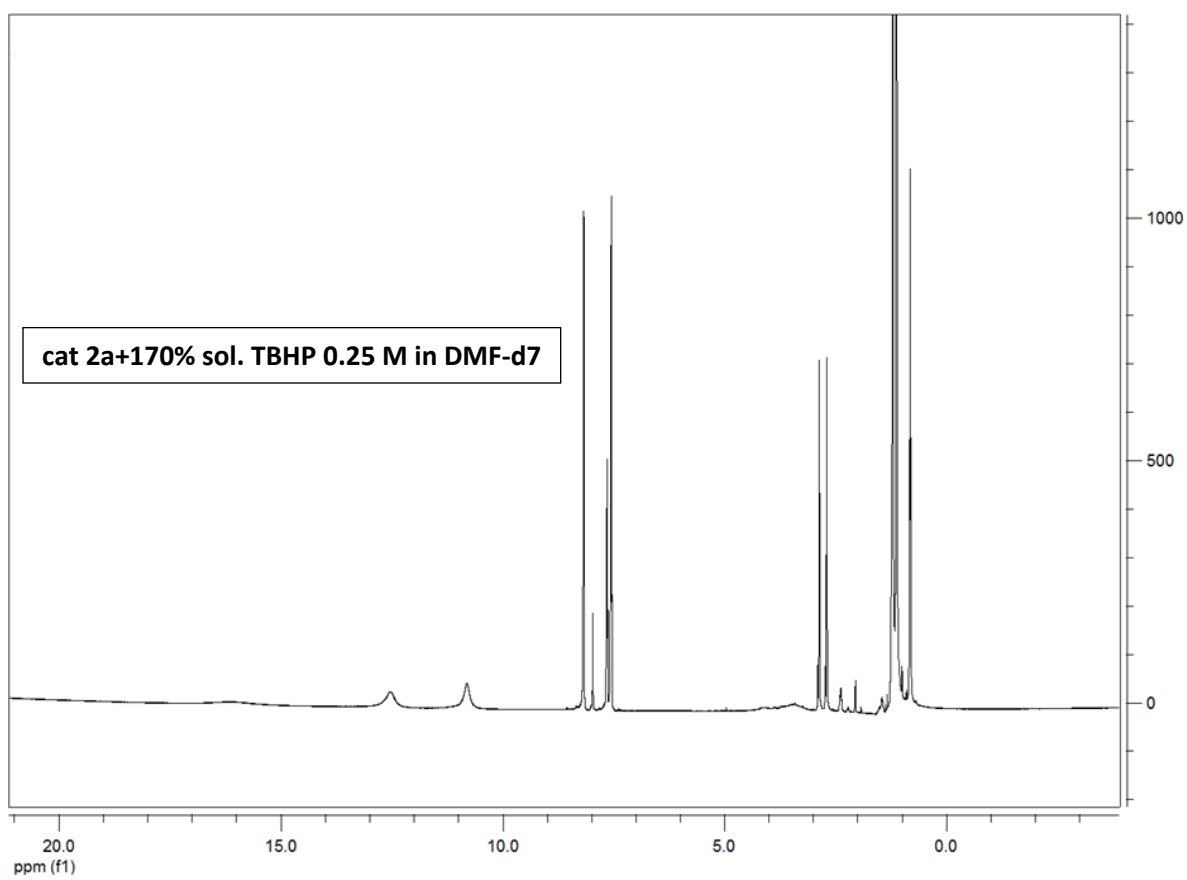

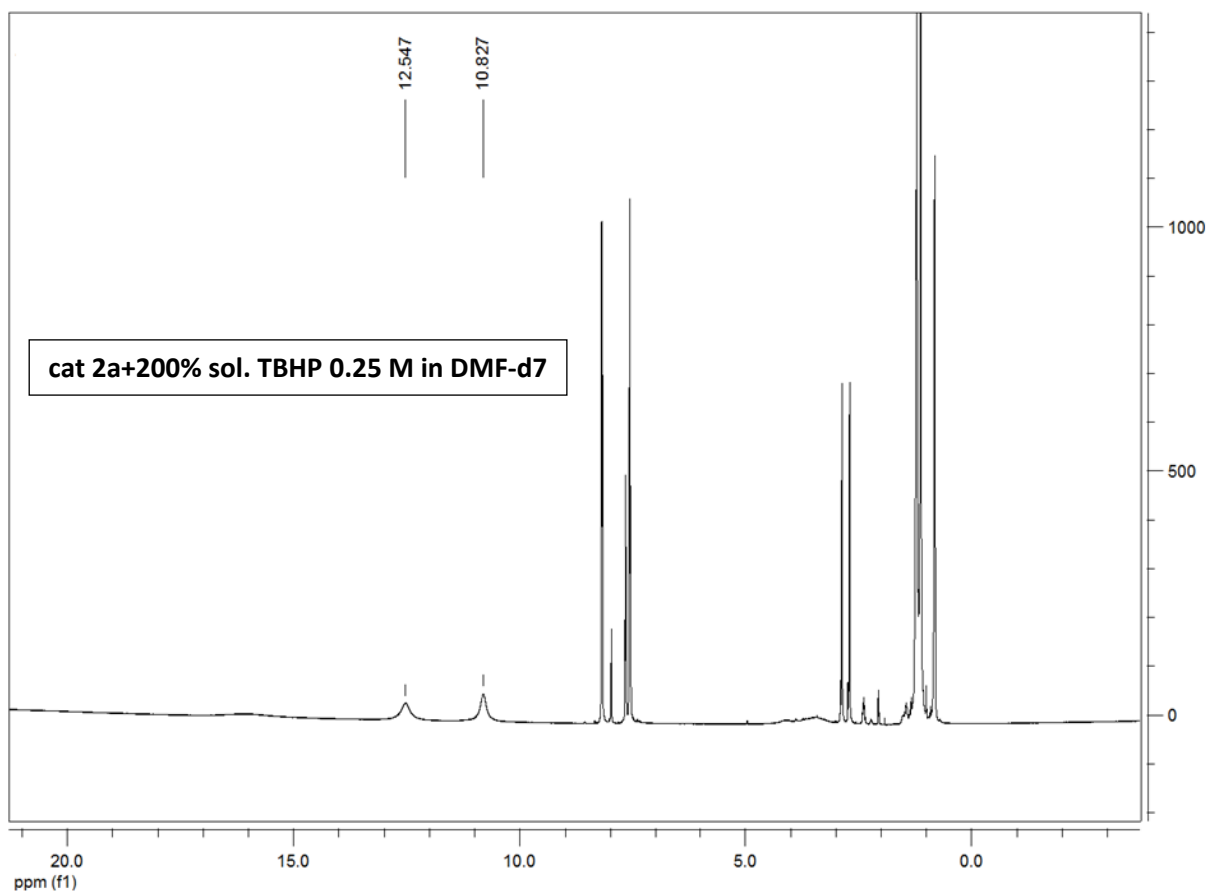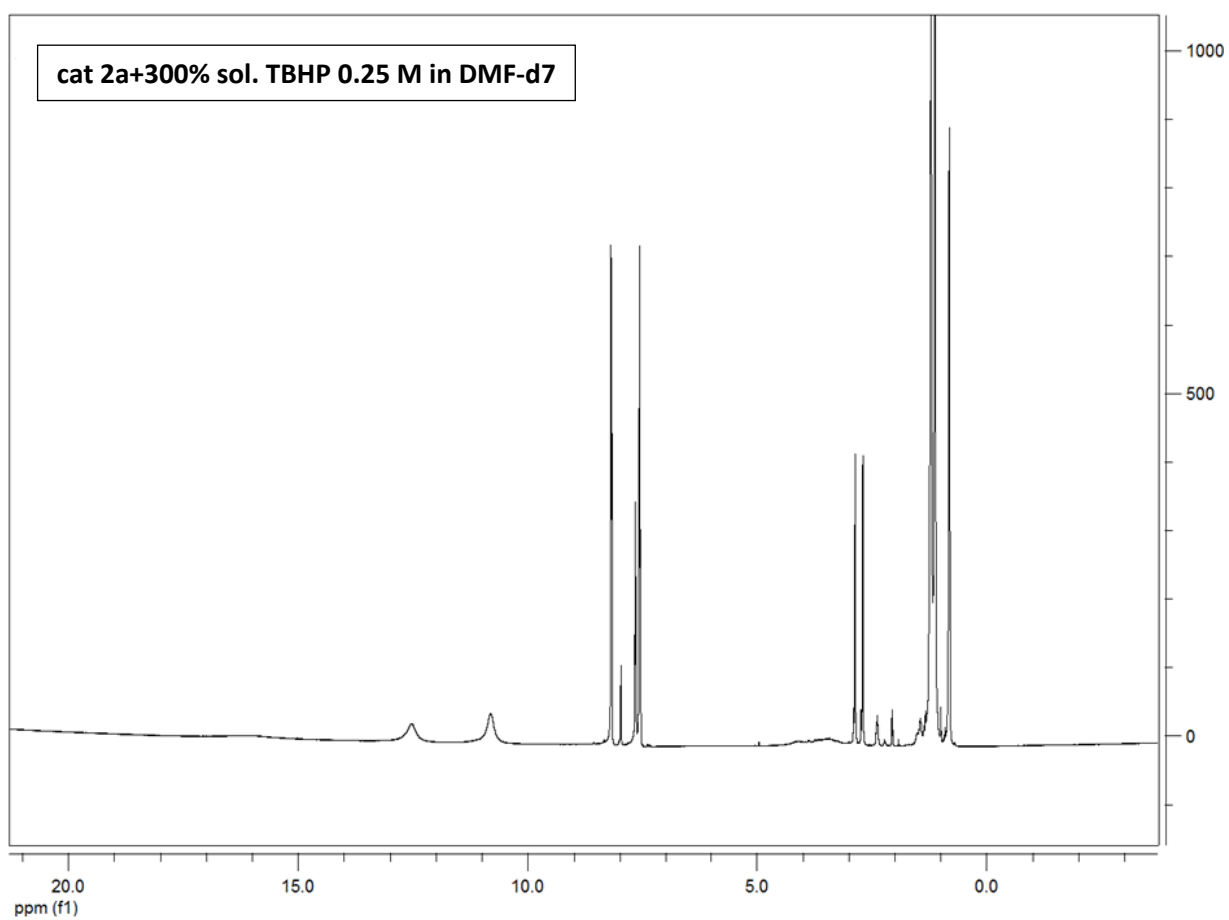

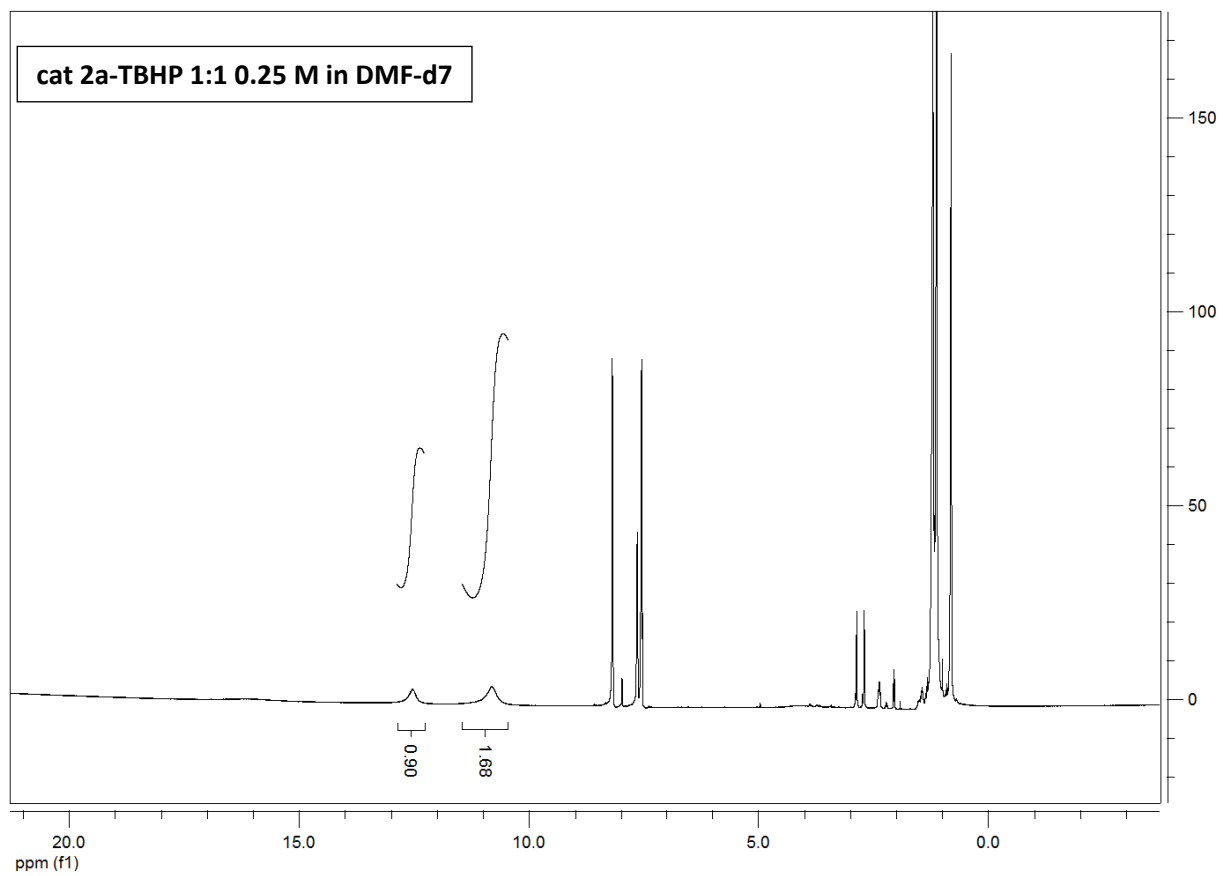

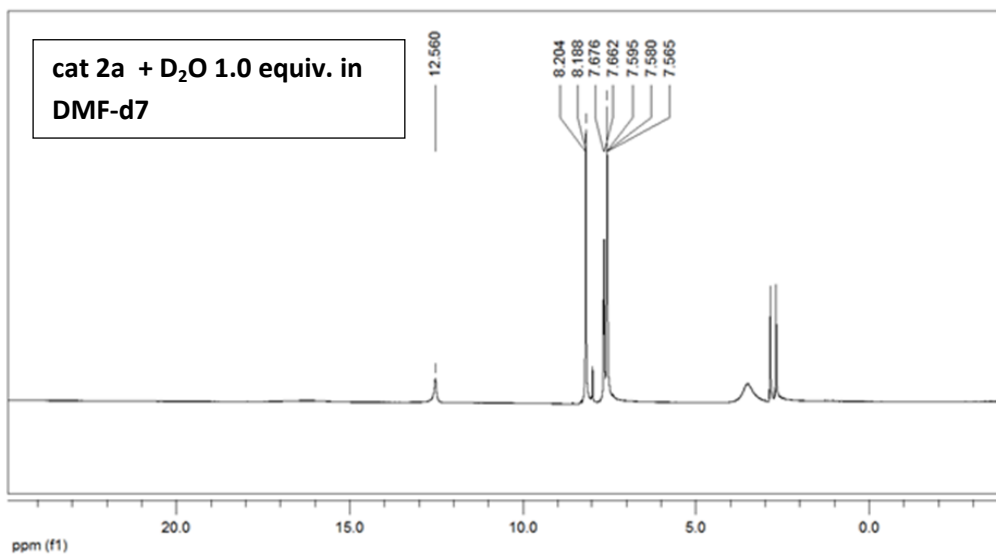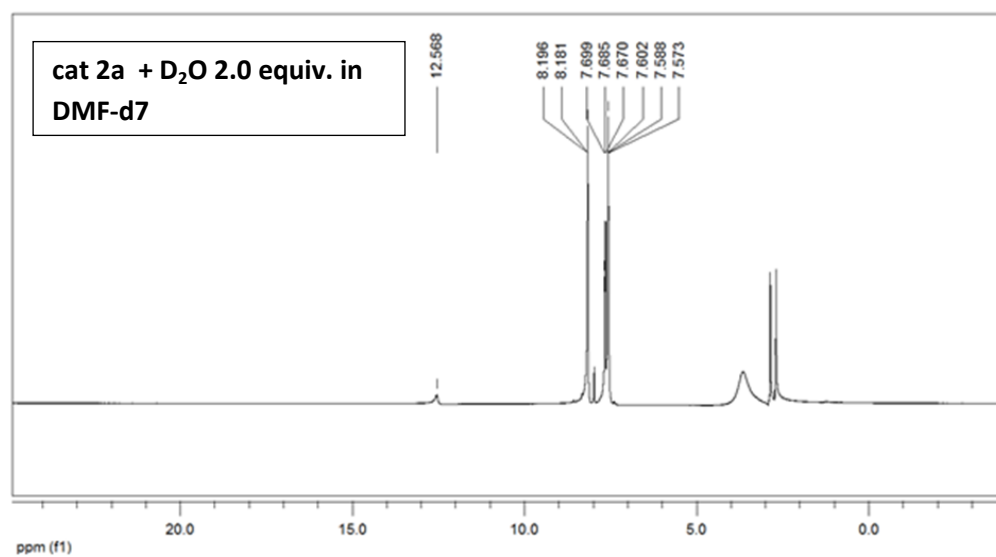

### 3. DFT-Optimized metric parameters

**Table 3.1** DFT-optimized geometry for TBHP in orthogonal Cartesian coordinate format.

| Center<br>Number | Atomic<br>Number | Coordinates (Angstroms) |           |           |
|------------------|------------------|-------------------------|-----------|-----------|
|                  |                  | X                       | Y         | Z         |
| 1                | 6                | 0.054168                | 0.000000  | -0.026033 |
| 2                | 8                | -0.008903               | 0.000000  | 1.398482  |
| 3                | 8                | 1.334236                | 0.000000  | 1.902590  |
| 4                | 1                | 1.135446                | 0.000000  | 2.846543  |
| 5                | 6                | -1.420626               | 0.000000  | -0.412339 |
| 6                | 6                | 0.752808                | 1.262920  | -0.523533 |
| 7                | 6                | 0.752808                | -1.262920 | -0.523533 |
| 8                | 1                | -1.523810               | 0.000000  | -1.505824 |
| 9                | 1                | -1.924593               | -0.891056 | -0.013706 |
| 10               | 1                | -1.924593               | 0.891056  | -0.013706 |
| 11               | 1                | 0.750337                | -1.299216 | -1.621937 |
| 12               | 1                | 1.793200                | -1.291593 | -0.176548 |
| 13               | 1                | 0.238350                | -2.156719 | -0.143653 |
| 14               | 1                | 0.750337                | 1.299216  | -1.621937 |
| 15               | 1                | 0.238350                | 2.156719  | -0.143653 |
| 16               | 1                | 1.793200                | 1.291593  | -0.176548 |

**Table 3.2.** DFT-optimized geometry for **2a** in orthogonal Cartesian coordinate format.

| Center<br>Number | Atomic<br>Number | Coordinates (Angstroms) |           |           |
|------------------|------------------|-------------------------|-----------|-----------|
|                  |                  | X                       | Y         | Z         |
| 1                | 7                | 0.039523                | 0.147031  | -0.003513 |
| 2                | 6                | 0.030625                | 0.166088  | 1.321863  |
| 3                | 7                | 1.244213                | 0.036604  | 1.859853  |
| 4                | 7                | 2.042801                | -0.070705 | 0.801622  |
| 5                | 7                | 1.334787                | -0.006860 | -0.295386 |
| 6                | 7                | -1.058616               | 0.326153  | 2.187958  |
| 7                | 6                | -2.391990               | 0.333819  | 1.952867  |
| 8                | 8                | -2.934459               | 0.170419  | 0.875642  |
| 9                | 6                | -3.233856               | 0.555760  | 3.194339  |
| 10               | 6                | -4.574778               | 0.162004  | 3.122180  |
| 11               | 6                | -5.427555               | 0.332933  | 4.207874  |
| 12               | 6                | -4.956266               | 0.919659  | 5.383319  |
| 13               | 6                | -3.628586               | 1.337310  | 5.458792  |
| 14               | 6                | -2.773988               | 1.157688  | 4.371816  |
| 15               | 1                | -6.468961               | 0.010796  | 4.137935  |
| 16               | 1                | -4.916429               | -0.273433 | 2.181916  |
| 17               | 1                | -1.745695               | 1.518792  | 4.440666  |
| 18               | 1                | -3.255034               | 1.814693  | 6.367241  |
| 19               | 1                | -5.624665               | 1.059121  | 6.235748  |
| 20               | 1                | -0.750466               | 0.344560  | 3.150527  |



**Table 3.3.** DFT-optimized geometry for the complex **2a**-TBHP in orthogonal Cartesian coordinate format.

| Center<br>Number | Atomic<br>Number | Coordinates (Angstroms) |           |           |
|------------------|------------------|-------------------------|-----------|-----------|
|                  |                  | X                       | Y         | Z         |
| 1                | 6                | 0.086930                | 0.028138  | -0.079202 |
| 2                | 6                | 0.007469                | 0.035760  | 1.318983  |
| 3                | 6                | 1.174135                | -0.138913 | 2.071344  |
| 4                | 6                | 2.394977                | -0.347329 | 1.438938  |
| 5                | 6                | 2.466338                | -0.366135 | 0.045694  |
| 6                | 6                | 1.312664                | -0.171143 | -0.711691 |
| 7                | 6                | -1.264138               | 0.263554  | 2.085655  |
| 8                | 8                | -1.267085               | 0.626830  | 3.234351  |
| 9                | 7                | -2.417006               | -0.007074 | 1.362892  |
| 10               | 6                | -3.709982               | 0.159815  | 1.798926  |
| 11               | 7                | -4.741110               | -0.447205 | 1.179122  |
| 12               | 7                | -5.871761               | -0.070047 | 1.786123  |
| 13               | 7                | -5.525743               | 0.717810  | 2.731766  |
| 14               | 7                | -4.193328               | 0.892808  | 2.776438  |
| 15               | 1                | 3.298065                | -0.490646 | 2.034548  |
| 16               | 1                | 1.094272                | -0.102679 | 3.158533  |
| 17               | 1                | -0.800510               | 0.209738  | -0.689040 |
| 18               | 1                | 1.368827                | -0.161315 | -1.801659 |
| 19               | 1                | 3.425400                | -0.523062 | -0.451201 |
| 20               | 1                | -2.325730               | -0.486304 | 0.471143  |
| 21               | 1                | -4.732551               | -1.082148 | 0.375455  |
| 22               | 8                | -2.847037               | -1.553607 | -1.258808 |
| 23               | 8                | -4.195118               | -1.993244 | -1.166271 |
| 24               | 1                | -2.367371               | -2.394123 | -1.308207 |
| 25               | 6                | -4.911802               | -1.730603 | -2.403578 |
| 26               | 6                | -6.306705               | -2.236718 | -2.059867 |
| 27               | 6                | -4.908976               | -0.237185 | -2.697317 |
| 28               | 6                | -4.279904               | -2.537856 | -3.528192 |
| 29               | 1                | -6.968539               | -2.106457 | -2.926231 |
| 30               | 1                | -6.283328               | -3.303173 | -1.798240 |
| 31               | 1                | -6.735601               | -1.677686 | -1.216549 |
| 32               | 1                | -5.496562               | -0.030775 | -3.602075 |
| 33               | 1                | -5.353656               | 0.327118  | -1.866153 |
| 34               | 1                | -3.887602               | 0.128462  | -2.863709 |
| 35               | 1                | -4.857748               | -2.415321 | -4.454033 |
| 36               | 1                | -3.254656               | -2.198873 | -3.728922 |
| 37               | 1                | -4.261764               | -3.607872 | -3.276616 |

### 3.2 Energy Surface Investigation for 2a

**Figure S1.** Potential energy surface obtained on varying the torsion angle  $\theta$  of the tetrazole ring with respect to the benzene plane (dihedral N2–C1–N1–C2 in Figure 5).

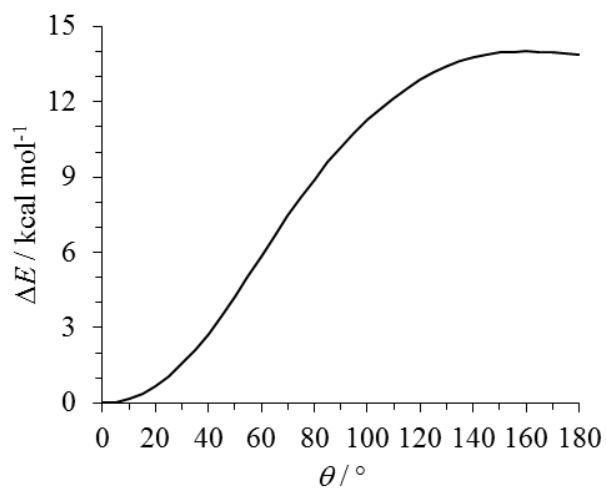

## 4 Catalyst recovery and scaling-up experiments

### 4.1 Scaling-up

#### Oxidation of sulphide **5a**

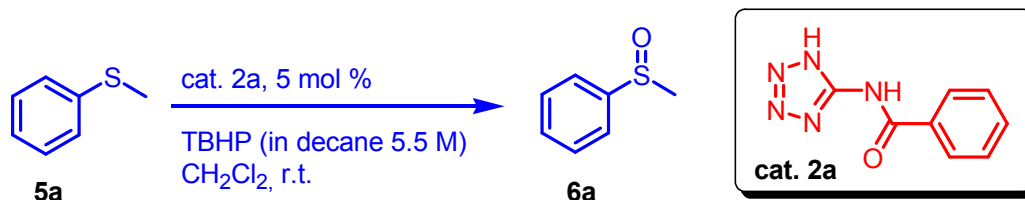

To a solution of sulphide **5a** (10 g, 0.080 mol) and tetrazole **2a** (750 mg, 0.0040 mol) in  $\text{CH}_2\text{Cl}_2$  (250 mL), *t*BuOOH (16 mL, 5.5 M in decane 1.1 eq.) was added dropwise over 10 min. The resulting mixture was stirred at room temperature and followed by Gc-Ms until completion. after 50h, the reaction mixture was filtered and the white solid was washed with  $\text{CH}_2\text{Cl}_2$  3X70 mL. The organic phase was concentrated under reduced pressure and the resulting yellow oil was purified by flash chromatography (silica gel, 80:20 hexane/ether). 92 % yield. Conversion >99%, ratio **6a/7a** = 99:1.

#### Oxidation of sulphide **5m**

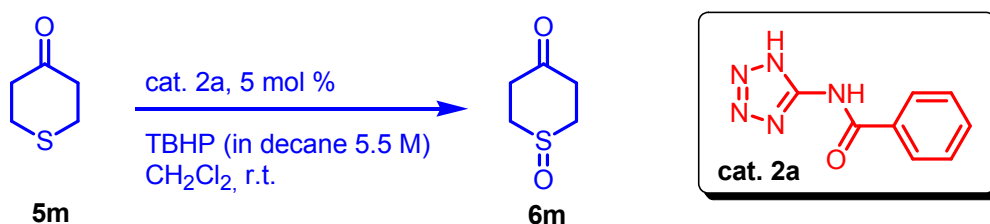

To a solution of sulphide **5m** (10 g, 0.086 mol) and tetrazole **2a** (814 mg, 0.0043 mol) in  $\text{CH}_2\text{Cl}_2$  (250 mL), *t*BuOOH (16 mL, 5.5 M in decane 1.1 eq.) was added dropwise over 10 min. The resulting mixture was stirred at room temperature and followed by Gc-Ms until completion. after 90h, the reaction mixture was filtered and the white solid was washed with  $\text{CH}_2\text{Cl}_2$  3X70 mL. The organic phase was concentrated under reduced pressure and the resulting yellow oil was purified by flash chromatography (silica gel, 80:20 hexane/ether). 90 % yield. Conversion >95%, ratio **6a/7a** = 99:1.

### 4.3 Catalyst recovery. Oxidation of sulphide **5a**

To value the catalyst recovery, we carried out a set of experiments as reported in table 4.1.

- 1) 150 mg of **cat. 2a** were loaded for the oxidation of 2 g of sulphide **5a**. At completion, the reaction mixture was filtered and washed with  $\text{CH}_2\text{Cl}_2$  (2 x 20 mL). **Cat. 2a** was collected and dried under reduced pressure for 12h at room temperature. The catalyst recovery % was determined by weighting of the dried white solid. (126 mg of catalyst, 84% recovered).

- 2) 120 mg of cat. **2a** were loaded for the oxidation of 1.60 g of sulphide **5a**. After filtration and drying, the catalyst recovery % was determined by weighting of the dried white solid. (100 mg of catalyst, 83% recovered).
- 3) 100 mg of cat. **2a** were loaded for the oxidation of 1.33 g of sulphide **5a**. After filtration and drying, the catalyst recovery % was determined by weighting of the dried white solid. (86 mg of catalyst, 84% recovered).
- 4) 82.5 mg of cat. **2a** were loaded for the oxidation of 1.10 g of sulphide **5a**. After filtration and drying, the catalyst recovery % was determined by weighting of the dried white solid. (60 mg of catalyst, 80% recovered).
- 5) 60 mg of cat. **2a** were loaded for the oxidation of 0.80 g of sulphide **5a**. After filtration and drying, the catalyst recovery % was determined by weighting of the dried white solid. (43 mg of catalyst, 72% recovered).
- 6) 37.5 mg of cat. **2a** were loaded for the oxidation of 0.50 g of sulphide **5a**. After filtration and drying, the catalyst recovery % was determined by weighting of the dried white solid. (21 mg of catalyst, 56% recovered).

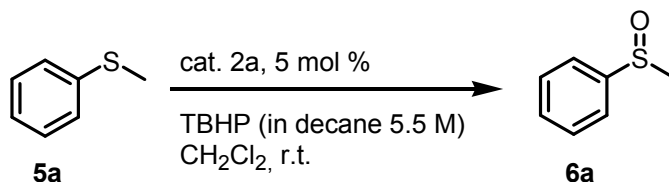

**Table 4.1.** Catalyst recovery.

| Reaction number | Reaction scale/g | cat. 2a 5 mol % (mg) | cat. 2a recovery g/(%) | 5a yield % | Time/h | 6a/7a ratio |
|-----------------|------------------|----------------------|------------------------|------------|--------|-------------|
| 1               | 2.0 g            | 150.0 mg             | 126 mg (84%)           | 90 %       | 60h    | 99:1        |
| 2               | 1.60 g           | 120.0 mg             | 100 mg (83%)           | 87 %       | 60h    | 99:1        |
| 3               | 1.33 g           | 100.0 mg             | 84 mg (84%)            | 88 %       | 74h    | 99:1        |
| 4               | 1.10 g           | 82.5 mg              | 75 mg (90%)            | 86 %       | 70h    | 99:1        |
| 5               | 1.00 g           | 75.0 mg              | 60 mg (80%)            | 89 %       | 80h    | 98:2        |
| 6               | 0.80 g           | 60.0 mg              | 43 mg (72%)            | 78 %       | 80h    | 98:2        |
| 7               | 0.50 g           | 37.5 mg              | 21 mg (56%)            | 85%        | 70h    | 99:1        |

TBHP (1.1 equiv. in decane), **2a** 5 mol %, in CH<sub>2</sub>Cl<sub>2</sub> (3 M), r.t. a) Yields calculated after flash chromatography. The reaction were followed by GC-MS until completion.

## 5. References

- 1) L. Changqing; K. Kazuaki; H. Yukihiro; S. Kazuhiko. *J. Org. Chem.* **1996**, *61*, 494-502
- 2) D. N. Hall; A. A. Oswald; K. Griesbaum. *J. Org. Chem.*, **1965**, *30*, 3829-3834
- 3) Q. Su; Z.-J. Zhao; F. Xu; P.-C. Lou; K. Zhang; D.-X. Xie; L. Shi; Q.-Y. Cai; Z.-H. Peng; D.-L. *Eur. J. Org. Chem.* **2013**, *8*, 1551-1557
- 4) U. Luhmann; F. G. Wentz; W. Lüttke; P. Süsse. *Chem. Berichte*, **1977**, *110*, 1421 – 1431
- 5) E. A. Mercier; C. D. Smith; M. Parvez; T. G. Back. *J. Org. Chem.* **2012**, *77*, 3508-3517
- 6) V. Mojr; V. Herzig; M. Budesinsky; R. Cibulka; T. Kraus. *Chem. Commun.* **2010**, *46*, 7599-7601
- 7) G. de Gonzalo; D. E. Torres Pazmiño; G. Ottolina; M. W. Fraaije; G. Carrera. *Tetrahedron: Asymm.* **2006**, *17*, 130-135
- 8) Q. Zeng; Y. Gao; J. Dong; W. Weng; Y. Zhao. *Tetrahedron: Asymm.* **2011**, *22*, 717-721
- 9) a) D. Ramkumar; S. Sankararaman. *Synthesis*, **1993**, *11*, 1057-1058, b) H. S. D. Soysa; W. P. Weber. *Tetrahedron: Lett.* **1978**, *19*, 235-238
- 10) N. Furukawa; S. Ogawa; K. Matsumura; F. Hisashi. *J. Org. Chem.* **1991**, *56*, 6341-6348
- 11) T. Jia; A. Bellomo; K. E. Baina; S. D. Dreher; P. J. Walsh. *J. Am. Chem. Soc.* **2013**, *135*, 3740-3743
- 12) S. Selvaraj; A. Dhanabalan; S. Renuga; S. Sivasubramanian; N. Arumugam. *Ind. J. Chem. Sect. B.* **1991**, *30*, 1060 -1061
- 13) P. Renaud, *Helv. Chim. Acta.* **1991**, *74*, 1305-1313
- 14) J. Fujisaki; K. Matsumoto; K., Matsumoto; T. Katsuki. *J. Am. Chem. Soc.* **2011**, *133*, 56-61
